# Supplementary material for: In Silico Genome-Wide Characterisation of the Lipid Transfer Protein Multigenic Family in Sunflower (H. annuus L.)
Source: MDPI journal article supplement (doi:10.3390/plants11050664), 2022-02-28
Supplement: s1 [file s1]

**Supplementary Figure S1:** Possible pseudogene belonging to Lipid Transfer Proteins (LTP) family in *Helianthus annuus*

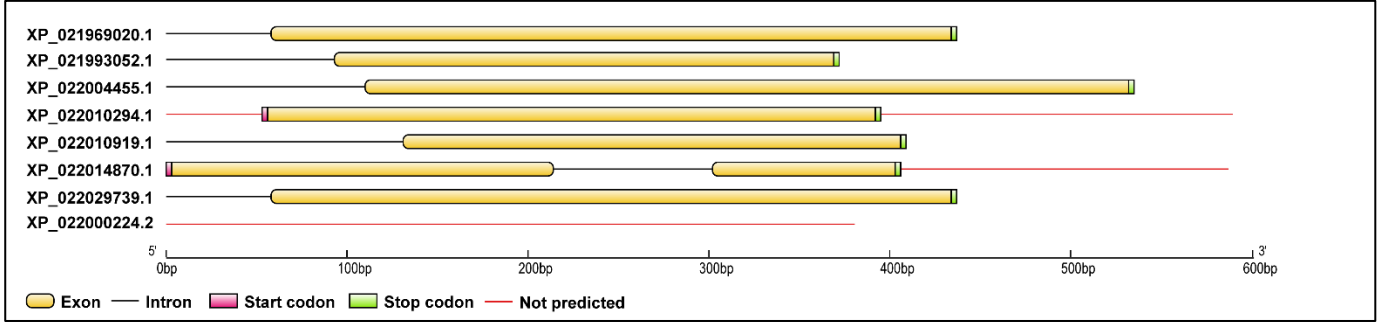

**Supplementary Table S1:** List of lipid transfer proteins in *H. annuus* genome

| NCBI protein id | NCBI locus id | Chromosome number | Locus Start | Locus Stop | Strand | Length | Number of exons |
|-----------------|---------------|-------------------|-------------|------------|--------|--------|-----------------|
| XP_022039085.1  | LOC110941729  | chromosome 1      | 581436      | 582257     | +      | 118    | 2               |
| XP_022033162.1  | LOC110934348  | chromosome 1      | 585234      | 586422     | -      | 119    | 2               |
| XP_022039074.2  | LOC110941719  | chromosome 1      | 624730      | 625499     | -      | 119    | 2               |
| XP_022014870.1  | LOC110914383  | chromosome 1      | 7597209     | 7598579    | -      | 195    | 4               |
| XP_022013182.1  | LOC110912707  | chromosome 1      | 7610565     | 7612215    | -      | 182    | 3               |
| XP_022013183.1  | LOC110912707  | chromosome 1      | 7610654     | 7612215    | -      | 160    | 3               |
| XP_021992525.1  | LOC110889321  | chromosome 1      | 7885930     | 7887022    | -      | 183    | 3               |
| XP_021993283.1  | LOC110890000  | chromosome 1      | 61013979    | 61014542   | -      | 187    | 1               |
| XP_021978807.1  | LOC110874493  | chromosome 1      | 108232434   | 108233698  | +      | 120    | 2               |
| XP_021981388.1  | LOC110877546  | chromosome 1      | 128458943   | 128459702  | +      | 162    | 2               |
| XP_021981395.1  | LOC110877546  | chromosome 1      | 128458943   | 128459702  | +      | 137    | 3               |
| XP_021981407.1  | LOC110877557  | chromosome 1      | 128462583   | 128463572  | +      | 166    | 2               |
| XP_022022835.1  | LOC110922945  | chromosome 2      | 138203574   | 138207310  | +      | 174    | 3               |
| XP_022026963.1  | LOC110928012  | chromosome 3      | 133526330   | 133526785  | +      | 151    | 1               |
| XP_022026964.1  | LOC110928013  | chromosome 3      | 133536088   | 133536504  | -      | 138    | 1               |
| XP_022029740.1  | LOC110930697  | chromosome 3      | 169779341   | 169780063  | -      | 114    | 2               |
| XP_022029738.1  | LOC110930696  | chromosome 3      | 169826692   | 169846789  | -      | 118    | 2               |
| XP_022029739.1  | LOC110930696  | chromosome 3      | 169826692   | 169827534  | -      | 117    | 2               |
| XP_022035551.1  | LOC110937439  | chromosome 4      | 179020078   | 179021301  | -      | 195    | 3               |
| XP_022035552.1  | LOC110937439  | chromosome 4      | 179020078   | 179021301  | -      | 193    | 3               |
| XP_022035384.1  | LOC110937295  | chromosome 4      | 183245545   | 183246245  | -      | 198    | 2               |
| XP_022021911.1  | LOC110921897  | chromosome 5      | 106564244   | 106565720  | +      | 189    | 3               |
| XP_022021912.1  | LOC110921897  | chromosome 5      | 106564244   | 106565720  | +      | 165    | 2               |
| XP_022021913.1  | LOC110921897  | chromosome 5      | 106564244   | 106565625  | +      | 164    | 3               |
| XP_022021914.1  | LOC110921897  | chromosome 5      | 106564244   | 106565638  | +      | 163    | 3               |
| XP_021969020.1  | LOC110864286  | chromosome 6      | 896081      | 896470     | +      | 129    | 1               |
| XP_021968895.1  | LOC110864082  | chromosome 6      | 81669868    | 81670637   | +      | 123    | 2               |
| XP_022037775.1  | LOC110940540  | chromosome 7      | 57654493    | 57654786   | -      | 97     | 1               |
| XP_021972810.1  | LOC110868035  | chromosome 7      | 94502385    | 94502877   | +      | 116    | 2               |
| XP_021973011.1  | LOC110868209  | chromosome 7      | 97575975    | 97576268   | -      | 97     | 1               |
| XP_021973316.1  | LOC110868466  | chromosome 7      | 125394885   | 125396628  | +      | 182    | 3               |
| XP_021973854.1  | LOC110868899  | chromosome 7      | 141936595   | 141937647  | -      | 118    | 2               |
| XP_021973855.1  | LOC110868900  | chromosome 7      | 141940297   | 141940718  | -      | 112    | 2               |
| XP_021976022.1  | LOC110871621  | chromosome 8      | 2652007     | 2655412    | +      | 189    | 2               |
| XP_021981626.1  | LOC110877736  | chromosome 9      | 56193955    | 56195123   | +      | 231    | 3               |
| XP_021978842.1  | LOC110874594  | chromosome 9      | 120415585   | 120416034  | -      | 149    | 1               |
| XP_035833070.1  | LOC110876985  | chromosome 9      | 187701647   | 187702501  | -      | 184    | 3               |
| XP_021984981.2  | LOC110880848  | chromosome 10     | 17259866    | 17260560   | +      | 165    | 3               |
| XP_021987457.1  | LOC110884099  | chromosome 10     | 18149573    | 18150784   | -      | 238    | 4               |
| XP_021987458.1  | LOC110884099  | chromosome 10     | 18149573    | 18150784   | -      | 234    | 4               |
| XP_021985239.1  | LOC110881217  | chromosome 10     | 36339358    | 36339804   | -      | 119    | 2               |
| XP_021988953.1  | LOC110885559  | chromosome 10     | 55844623    | 55846066   | -      | 218    | 3               |
| XP_021986500.1  | LOC110882920  | chromosome 10     | 154153690   | 154154007  | -      | 105    | 1               |
| XP_021993222.1  | LOC110889963  | chromosome 11     | 31344829    | 31346383   | -      | 324    | 2               |
| XP_021993221.1  | LOC110889962  | chromosome 11     | 31365864    | 31366954   | -      | 299    | 2               |
| XP_021993220.1  | LOC110889960  | chromosome 11     | 31457171    | 31458250   | -      | 290    | 2               |
| XP_021995117.1  | LOC110892047  | chromosome 11     | 50026964    | 50027691   | +      | 141    | 2               |
| XP_021993622.1  | LOC110890334  | chromosome 11     | 50482291    | 50483656   | -      | 285    | 2               |
| XP_021995116.1  | LOC110892046  | chromosome 11     | 50538364    | 50538849   | -      | 161    | 1               |
| XP_021993620.1  | LOC110890331  | chromosome 11     | 50546644    | 50547165   | -      | 173    | 1               |
| XP_021993621.2  | LOC110890332  | chromosome 11     | 50572849    | 50573340   | -      | 163    | 1               |
| XP_021993551.1  | LOC110890261  | chromosome 11     | 52380677    | 52384009   | +      | 181    | 3               |
| XP_035835830.1  | LOC110863966  | chromosome 11     | 108158307   | 108158677  | -      | 94     | 2               |
| XP_021988229.1  | LOC110884826  | chromosome 11     | 113298018   | 113298768  | -      | 118    | 2               |
| XP_021993052.1  | LOC110889796  | chromosome 11     | 125753126   | 125753678  | -      | 115    | 2               |
| XP_021989733.1  | LOC110886266  | chromosome 11     | 144490130   | 144491111  | +      | 173    | 2               |
| XP_021989734.1  | LOC110886267  | chromosome 11     | 144569037   | 144570202  | +      | 173    | 2               |
| XP_021989735.1  | LOC110886269  | chromosome 11     | 144702358   | 144703486  | +      | 173    | 2               |
| XP_021989736.1  | LOC110886270  | chromosome 11     | 144721120   | 144722287  | +      | 173    | 3               |
| XP_021989737.1  | LOC110886271  | chromosome 11     | 144767805   | 144769027  | +      | 173    | 2               |
| XP_021999258.1  | LOC110896126  | chromosome 12     | 160209484   | 160211308  | +      | 179    | 2               |
| XP_022000224.2  | LOC110897803  | chromosome 13     | 50218842    | 50219201   | +      | 119    | 1               |
| XP_022000196.1  | LOC110897772  | chromosome 13     | 56847763    | 56852051   | -      | 147    | 3               |
| XP_022001254.1  | LOC110898730  | chromosome 13     | 93772080    | 93773587   | -      | 209    | 3               |
| XP_022004979.1  | LOC110903125  | chromosome 13     | 108695467   | 108695979  | +      | 170    | 1               |
| XP_022004980.1  | LOC110903127  | chromosome 13     | 108820267   | 108820719  | +      | 150    | 1               |
| XP_022002421.1  | LOC110899840  | chromosome 13     | 152431601   | 152432072  | -      | 116    | 2               |
| XP_022002420.1  | LOC110899839  | chromosome 13     | 152438050   | 152445045  | -      | 116    | 2               |
| XP_022002419.1  | LOC110899837  | chromosome 13     | 152481868   | 152482341  | +      | 116    | 2               |
| XP_022002418.1  | LOC110899836  | chromosome 13     | 152491525   | 152492008  | -      | 116    | 2               |
| XP_022004455.1  | LOC110902020  | chromosome 13     | 152522835   | 152530074  | +      | 152    | 3               |
| XP_022002417.1  | LOC110899835  | chromosome 13     | 152577385   | 152577868  | -      | 116    | 2               |
| XP_022002416.1  | LOC110899834  | chromosome 13     | 152600693   | 152601176  | -      | 116    | 2               |

|                |              |               |           |             |     |   |
|----------------|--------------|---------------|-----------|-------------|-----|---|
| XP_022002415.1 | LOC110899830 | chromosome 13 | 152696656 | 152697139 - | 116 | 2 |
| XP_021984766.1 | LOC110880578 | chromosome 14 | 79297053  | 79298729 -  | 147 | 3 |
| XP_022009213.1 | LOC110908581 | chromosome 14 | 81531614  | 81532253 -  | 173 | 2 |
| XP_035838717.1 | LOC110908581 | chromosome 14 | 81531614  | 81532253 -  | 169 | 2 |
| XP_022008275.1 | LOC110907631 | chromosome 14 | 155413680 | 155414231 - | 143 | 2 |
| XP_022008276.2 | LOC110907632 | chromosome 14 | 155425541 | 155426767 - | 408 | 1 |
| XP_022006327.1 | LOC110904777 | chromosome 14 | 165399587 | 165400713 - | 135 | 2 |
| XP_022006668.1 | LOC110905097 | chromosome 14 | 171383331 | 171383698 + | 88  | 2 |
| XP_022010291.1 | LOC110909857 | chromosome 15 | 1698198   | 1699659 +   | 117 | 2 |
| XP_022010292.1 | LOC110909858 | chromosome 15 | 1705435   | 1706092 +   | 133 | 2 |
| XP_022013558.1 | LOC110913007 | chromosome 15 | 1712070   | 1712680 +   | 116 | 2 |
| XP_022010296.1 | LOC110909863 | chromosome 15 | 1717089   | 1717690 +   | 116 | 2 |
| XP_022010294.1 | LOC110909860 | chromosome 15 | 1719527   | 1720412 +   | 113 | 2 |
| XP_022010295.2 | LOC110909861 | chromosome 15 | 1744980   | 1745644 +   | 117 | 2 |
| XP_022013560.1 | LOC110913009 | chromosome 15 | 1747245   | 1748158 +   | 115 | 2 |
| XP_022010919.1 | LOC110910600 | chromosome 15 | 11013390  | 11035335 -  | 121 | 3 |
| XP_022010101.1 | LOC110909475 | chromosome 15 | 27816228  | 27817692 +  | 115 | 2 |
| XP_022006926.1 | LOC110905651 | chromosome 15 | 27857052  | 27857940 +  | 116 | 2 |
| XP_022006927.1 | LOC110905652 | chromosome 15 | 27859102  | 27859845 +  | 116 | 2 |
| XP_022010616.1 | LOC110910229 | chromosome 15 | 120041266 | 120041773 + | 128 | 2 |
| XP_022015084.1 | LOC110914604 | chromosome 15 | 158011912 | 158012277 - | 121 | 1 |
| XP_022013239.1 | LOC110912748 | chromosome 15 | 158153608 | 158154982 + | 276 | 2 |
| XP_022018622.1 | LOC110918654 | chromosome 16 | 153809761 | 153810196 - | 110 | 2 |
| XP_022029622.1 | LOC110930599 | chromosome 16 | 155393196 | 155393558 - | 120 | 1 |
| XP_022034230.1 | LOC110936193 | chromosome 17 | 42192992  | 42193416 +  | 117 | 2 |
| XP_022005608.1 | LOC110904098 | chromosome 17 | 119157650 | 119157937 - | 95  | 1 |
| XP_035842399.1 | LOC110922502 | chromosome 17 | 157630148 | 157663971 - | 135 | 7 |
| XP_022022487.2 | LOC110922502 | chromosome 17 | 157657306 | 157661254 - | 117 | 2 |

**Supplementary Table S2:** amino acid motifs discovered by MEME amongst HaLTPs

| <b>MEME motifs</b> | <b>Consensus sequences</b>               |
|--------------------|------------------------------------------|
| Red motif          | CCNGVKGLNAAAKTTADRQAACGCLKSAYSSJSGI      |
| Grey motif         | YAEASTCGQVLSSLSPCLNYLTGGGSVPP            |
| Green motif        | AGNAASLPGKCGVNIPYKISPSTDCSKVQ            |
| Purple motif       | NGGGSSLGLNINQTLALELPKACNVQTPP            |
| Yellow motif       | QKEZQLLQCCQZLQNVEEQCQCEAVKQVFRZAQQQVQQQQ |

Supplementary Table S3: Blastp Similarity of Group 2, Group 3 and Group 4 HalTPs on wetspot database.

| NCBI protein id | UniprotKB id            | Similarity Percentage | UniprotKB description                                                                                               | Pham id | Pham Description                           | HalTPs Group |
|-----------------|-------------------------|-----------------------|---------------------------------------------------------------------------------------------------------------------|---------|--------------------------------------------|--------------|
| XP_021993220.1  | sp P15461 2SS5_HELAN    | 84.25                 | 2SS5_HELAN 2S seed storage protein OS=Helianthus annuus OX=4232 GN=HAG5 PE=1 SV=1                                   | PF00234 | Protease inhibitor/seed storage/LTP family | Group 2      |
| XP_021993221.1  | sp P15461 2SS5_HELAN    | 96.63                 | 2SS5_HELAN 2S seed storage protein OS=Helianthus annuus OX=4232 GN=HAG5 PE=1 SV=1                                   | PF00234 | Protease inhibitor/seed storage/LTP family |              |
| XP_021993222.1  | sp P15461 2SS5_HELAN    | 58.15                 | 2SS5_HELAN 2S seed storage protein OS=Helianthus annuus OX=4232 GN=HAG5 PE=1 SV=1                                   | PF00234 | Protease inhibitor/seed storage/LTP family |              |
| XP_021993253.1  | sp P01045 KN02_BOVIN    | 47.5                  | KN02_BOVIN Kruppel-2 OS=Bos taurus OX=9913 GN=KN02 PE=1 SV=1                                                        | NA      | NA                                         |              |
| XP_021993620.1  | sp P15461 2SS5_HELAN    | 60.67                 | 2SS5_HELAN 2S seed storage protein OS=Helianthus annuus OX=4232 GN=HAG5 PE=1 SV=1                                   | PF00234 | Protease inhibitor/seed storage/LTP family |              |
| XP_021993621.2  | sp P15461 2SS5_HELAN    | 61.9                  | 2SS5_HELAN 2S seed storage protein OS=Helianthus annuus OX=4232 GN=HAG5 PE=1 SV=1                                   | PF00234 | Protease inhibitor/seed storage/LTP family |              |
| XP_021993622.1  | sp P15461 2SS5_HELAN    | 76.73                 | 2SS5_HELAN 2S seed storage protein OS=Helianthus annuus OX=4232 GN=HAG5 PE=1 SV=1                                   | PF00234 | Protease inhibitor/seed storage/LTP family |              |
| XP_021995116.1  | sp P15461 2SS5_HELAN    | 64.19                 | 2SS5_HELAN 2S seed storage protein OS=Helianthus annuus OX=4232 GN=HAG5 PE=1 SV=1                                   | PF00234 | Protease inhibitor/seed storage/LTP family |              |
| XP_022004979.1  | sp Q36492 SS5_CUCMA     | 26.51                 | SS5_CUCMA 2S albumin OS=Cucurbita maxima OX=3661 PE=1 SV=1                                                          | PF00234 | Protease inhibitor/seed storage/LTP family |              |
| XP_022004980.1  | sp Q36492 SS5_CUCMA     | 28.95                 | SS5_CUCMA 2S albumin OS=Cucurbita maxima OX=3661 PE=1 SV=1                                                          | PF00234 | Protease inhibitor/seed storage/LTP family |              |
| XP_022008275.1  | sp Q36492 SS5_CUCMA     | 29.85                 | SS5_CUCMA 2S albumin OS=Cucurbita maxima OX=3661 PE=1 SV=1                                                          | PF00234 | Protease inhibitor/seed storage/LTP family |              |
| XP_022008276.2  | sp Q36492 SS5_CUCMA     | 28.06                 | SS5_CUCMA 2S albumin OS=Cucurbita maxima OX=3661 PE=1 SV=1                                                          | PF00234 | Protease inhibitor/seed storage/LTP family |              |
| XP_022013239.1  | sp P15461 2SS5_HELAN    | 39.85                 | 2SS5_HELAN 2S seed storage protein OS=Helianthus annuus OX=4232 GN=HAG5 PE=1 SV=1                                   | PF00234 | Protease inhibitor/seed storage/LTP family |              |
| XP_022015084.1  | sp P0C8Y8 B2SS2_BEREX   | 29.91                 | B2SS2_BEREX 2S sulfur-rich seed storage protein 2 OS=Bertholletia excelsa OX=3645 GN=B2SS2 PE=3 SV=1                | PF00234 | Protease inhibitor/seed storage/LTP family |              |
| XP_022026963.1  | sp Q40VUS SFT11_HELAN   | 100                   | SFT11_HELAN Trypsin inhibitor 1 OS=Helianthus annuus OX=4232 GN=sft11 PE=1 SV=1                                     | PF00234 | Protease inhibitor/seed storage/LTP family |              |
| XP_022026964.1  | sp Q0F031 2SS5_HELAN    | 29.75                 | 2SS5_ARATH 2S seed storage protein 5 OS=Arabidopsis thaliana OX=3702 GN=SESA5 PE=1 SV=1                             | PF00234 | Protease inhibitor/seed storage/LTP family |              |
| XP_022033070.1  | sp P15461 2SS5_HELAN    | 85.93                 | 2SS5_HELAN 2S seed storage protein OS=Helianthus annuus OX=4232 GN=HAG5 PE=1 SV=1                                   | PF00234 | Protease inhibitor/seed storage/LTP family |              |
| XP_021973011.1  | sp P82353 NLT2_PRUAR    | 58.82                 | NLT2_PRUAR Non-specific lipid-transfer protein 2 OS=Prunus americana OX=36596 PE=1 SV=1                             | PF14368 | Probable lipid transfer                    |              |
| XP_021973854.1  | sp Q36492 DIRL1_ARATH   | 36.11                 | DIRL1_ARATH Putative lipid-transfer protein DIR1 OS=Arabidopsis thaliana OX=3702 GN=DIR1 PE=1 SV=1                  | PF14368 | Probable lipid transfer                    |              |
| XP_021973855.1  | sp Q36492 DIRL1_ARATH   | 31.94                 | DIRL1_ARATH Putative lipid-transfer protein DIR1 OS=Arabidopsis thaliana OX=3702 GN=DIR1 PE=1 SV=1                  | PF14368 | Probable lipid transfer                    |              |
| XP_021978442.1  | sp Q0FF73 TG30_ARATH    | 53.47                 | LTG30_ARATH Non-specific lipid transfer protein GPI-anchored 30 OS=Arabidopsis thaliana OX=3702 GN=LTGP30 PE=2 SV=1 | PF14368 | Probable lipid transfer                    |              |
| XP_021986500.1  | sp Q36492 DIRL1_ARATH   | 44.29                 | DIRL1_ARATH Putative lipid-transfer protein DIR1 OS=Arabidopsis thaliana OX=3702 GN=DIR1 PE=1 SV=1                  | PF14368 | Probable lipid transfer                    |              |
| XP_021993052.1  | sp Q36492 DIRL1_ARATH   | 35.38                 | DIRL1_ARATH Putative lipid-transfer protein DIR1 OS=Arabidopsis thaliana OX=3702 GN=DIR1 PE=1 SV=1                  | PF14368 | Probable lipid transfer                    |              |
| XP_021995117.1  | sp P23110 2SS5_HELAN    | 98.58                 | 2SS5_HELAN Albumin-8 OS=Helianthus annuus OX=4232 PE=1 SV=1                                                         | PF00234 | Protease inhibitor/seed storage/LTP family | Group 3      |
| XP_022009196.1  | sp Q36492 F7LTPG7_ARATH | 42.76                 | LTPG7_ARATH Non-specific lipid transfer protein GPI-anchored 7 OS=Arabidopsis thaliana OX=3702 GN=LTPG7 PE=2 SV=1   | PF14368 | Probable lipid transfer                    |              |
| XP_022005608.1  | sp P82353 NLT2_PRUAR    | 60.29                 | NLT2_PRUAR Non-specific lipid-transfer protein 2 OS=Prunus americana OX=36596 PE=1 SV=1                             | PF14368 | Probable lipid transfer                    |              |
| XP_022006327.1  | sp Q36492 DIRL1_ARATH   | 36.11                 | DIRL1_ARATH Putative lipid-transfer protein DIR1 OS=Arabidopsis thaliana OX=3702 GN=DIR1 PE=1 SV=1                  | PF14368 | Probable lipid transfer                    |              |
| XP_022010919.1  | sp Q7EB72 TG15_ARATH    | 32.89                 | LTG15_ARATH Non-specific lipid transfer protein GPI-anchored 15 OS=Arabidopsis thaliana OX=3702 GN=LTGP15 PE=2 SV=1 | PF14368 | Probable lipid transfer                    |              |
| XP_022016223.1  | sp Q0M4X7 NLT2_PRUAR    | 34.69                 | NLT2_PRUAR Non-specific lipid transfer protein GPI-anchored 7 OS=Arabidopsis thaliana OX=3702 GN=LTPG7 PE=2 SV=1    | PF14368 | Probable lipid transfer                    |              |
| XP_022022835.1  | sp Q36492 DIRL1_ARATH   | 39.16                 | LTPG7_ARATH Non-specific lipid transfer protein GPI-anchored 7 OS=Arabidopsis thaliana OX=3702 GN=LTPG7 PE=2 SV=1   | PF14368 | Probable lipid transfer                    |              |
| XP_022033775.1  | sp Q36492 DIRL1_ARATH   | 49.33                 | DIRL1_ARATH Putative lipid-transfer protein DIR1 OS=Arabidopsis thaliana OX=3702 GN=DIR1 PE=1 SV=1                  | PF14368 | Probable lipid transfer                    |              |
| XP_021969020.1  | sp P140091 4KD_DAUCA    | 54.41                 | 14KD_DAUCA 14 kDa proline-rich protein DC2.15 OS=Daucus carota OX=4039 PE=2 SV=1                                    | PF14547 | Hydrophobic seed protein                   |              |
| XP_021973116.1  | sp Q064658 TG14_ARATH   | 35.75                 | LTG14_ARATH Non-specific lipid transfer protein GPI-anchored 14 OS=Arabidopsis thaliana OX=3702 GN=LTGP14 PE=2 SV=1 | PF14368 | Probable lipid transfer                    |              |
| XP_021976022.1  | sp Q0C7F7 LTPG1_ARATH   | 44.59                 | LTPG1_ARATH Non-specific lipid transfer protein GPI-anchored 1 OS=Arabidopsis thaliana OX=3702 GN=LTPG1 PE=2 SV=1   | PF14368 | Probable lipid transfer                    |              |
| XP_021981388.1  | sp Q36492 LTPG5_ARATH   | 49.69                 | LTPG5_ARATH Non-specific lipid transfer protein GPI-anchored 5 OS=Arabidopsis thaliana OX=3702 GN=LTPG5 PE=2 SV=1   | PF14368 | Probable lipid transfer                    |              |
| XP_021981395.1  | sp Q36492 LTPG5_ARATH   | 52.1                  | LTPG5_ARATH Non-specific lipid transfer protein GPI-anchored 5 OS=Arabidopsis thaliana OX=3702 GN=LTPG5 PE=2 SV=1   | PF14368 | Probable lipid transfer                    |              |
| XP_021981407.1  | sp Q36492 LTPG5_ARATH   | 51.79                 | LTPG5_ARATH Non-specific lipid transfer protein GPI-anchored 5 OS=Arabidopsis thaliana OX=3702 GN=LTPG5 PE=2 SV=1   | PF14368 | Probable lipid transfer                    |              |
| XP_021981626.1  | sp Q1G2Y5 LTG21_ARATH   | 55.63                 | LTG21_ARATH Non-specific lipid transfer protein GPI-anchored 21 OS=Arabidopsis thaliana OX=3702 GN=LTGP21 PE=2 SV=1 | PF14368 | Probable lipid transfer                    |              |
| XP_021984766.1  | sp Q36492 LTPG5_ARATH   | 48.57                 | LTPG5_ARATH Non-specific lipid transfer protein GPI-anchored 5 OS=Arabidopsis thaliana OX=3702 GN=LTPG5 PE=2 SV=1   | PF14368 | Probable lipid transfer                    |              |
| XP_021984981.2  | sp Q36492 LTPG5_ARATH   | 49.64                 | LTPG5_ARATH Non-specific lipid transfer protein GPI-anchored 5 OS=Arabidopsis thaliana OX=3702 GN=LTPG5 PE=2 SV=1   | PF14368 | Probable lipid transfer                    |              |
| XP_021987457.1  | sp Q04A3X LTG16_ARATH   | 38.16                 | LTG16_ARATH Non-specific lipid transfer protein GPI-anchored 16 OS=Arabidopsis thaliana OX=3702 GN=LTGP16 PE=2 SV=1 | PF14368 | Probable lipid transfer                    |              |
| XP_021987458.1  | sp Q04A3X LTG16_ARATH   | 39.29                 | LTG16_ARATH Non-specific lipid transfer protein GPI-anchored 16 OS=Arabidopsis thaliana OX=3702 GN=LTGP16 PE=2 SV=1 | PF14368 | Probable lipid transfer                    |              |
| XP_021988953.1  | sp Q36492 LTPG5_ARATH   | 33.14                 | LTG31_ARATH Non-specific lipid transfer protein GPI-anchored 31 OS=Arabidopsis thaliana OX=3702 GN=LTGP31 PE=2 SV=1 | PF14368 | Probable lipid transfer                    | Group 4      |
| XP_021989733.1  | sp Q36492 LTPG5_ARATH   | 49.12                 | LTPG5_ARATH Non-specific lipid transfer protein GPI-anchored 5 OS=Arabidopsis thaliana OX=3702 GN=LTPG5 PE=2 SV=1   | PF14368 | Probable lipid transfer                    |              |
| XP_021989734.1  | sp Q36492 LTPG5_ARATH   | 47.37                 | LTPG5_ARATH Non-specific lipid transfer protein GPI-anchored 5 OS=Arabidopsis thaliana OX=3702 GN=LTPG5 PE=2 SV=1   | PF14368 | Probable lipid transfer                    |              |
| XP_021989735.1  | sp Q36492 LTPG5_ARATH   | 47.37                 | LTPG5_ARATH Non-specific lipid transfer protein GPI-anchored 5 OS=Arabidopsis thaliana OX=3702 GN=LTPG5 PE=2 SV=1   | PF14368 | Probable lipid transfer                    |              |
| XP_021989736.1  | sp Q36492 LTPG5_ARATH   | 47.95                 | LTPG5_ARATH Non-specific lipid transfer protein GPI-anchored 5 OS=Arabidopsis thaliana OX=3702 GN=LTPG5 PE=2 SV=1   | PF14368 | Probable lipid transfer                    |              |
| XP_021989737.1  | sp Q36492 LTPG5_ARATH   | 48.54                 | LTPG5_ARATH Non-specific lipid transfer protein GPI-anchored 5 OS=Arabidopsis thaliana OX=3702 GN=LTPG5 PE=2 SV=1   | PF14368 | Probable lipid transfer                    |              |
| XP_021992525.1  | sp Q7EB72 TG15_ARATH    | 42.13                 | LTG15_ARATH Non-specific lipid transfer protein GPI-anchored 15 OS=Arabidopsis thaliana OX=3702 GN=LTGP15 PE=2 SV=1 | PF14368 | Probable lipid transfer                    |              |
| XP_021993551.1  | sp Q36492 LTPG5_ARATH   | 50.55                 | LTG31_ARATH Non-specific lipid transfer protein GPI-anchored 31 OS=Arabidopsis thaliana OX=3702 GN=LTGP31 PE=2 SV=1 | PF14368 | Probable lipid transfer                    |              |
| XP_021999258.1  | sp Q7EB72 TG15_ARATH    | 40.27                 | LTPG1_ARATH Non-specific lipid transfer protein GPI-anchored 1 OS=Arabidopsis thaliana OX=3702 GN=LTPG1 PE=2 SV=1   | PF14368 | Probable lipid transfer                    |              |
| XP_022000242.2  | sp Q9F7T2 NLTPE_ARATH   | 56.36                 | NLTPE_ARATH Putative non-specific lipid transfer protein 14 OS=Arabidopsis thaliana OX=3702 GN=LTP14 PE=3 SV=2      | NA      | NA                                         |              |
| XP_022001254.1  | sp Q64644 TG13_ARATH    | 38.69                 | LTG13_ARATH Non-specific lipid transfer protein GPI-anchored 13 OS=Arabidopsis thaliana OX=3702 GN=LTGP13 PE=2 SV=1 | PF14368 | Probable lipid transfer                    |              |
| XP_022006658.1  | sp Q38737 FIL1_ANTMA    | 50                    | FIL1_ANTMA Stamen-specific protein FIL1 OS=Antennaria majus OX=4151 GN=FIL1 PE=2 SV=1                               | PF00234 | Protease inhibitor/seed storage/LTP family |              |
| XP_022009213.1  | sp Q36492 LTPG5_ARATH   | 59.26                 | LTPG5_ARATH Non-specific lipid transfer protein GPI-anchored 5 OS=Arabidopsis thaliana OX=3702 GN=LTPG5 PE=2 SV=1   | PF14368 | Probable lipid transfer                    |              |
| XP_022013182.1  | sp Q7EB72 TG15_ARATH    | 41.11                 | LTG15_ARATH Non-specific lipid transfer protein GPI-anchored 15 OS=Arabidopsis thaliana OX=3702 GN=LTGP15 PE=2 SV=1 | PF14368 | Probable lipid transfer                    |              |
| XP_022013183.1  | sp Q36492 LTPG5_ARATH   | 51.64                 | LTPG5_ARATH Non-specific lipid transfer protein GPI-anchored 5 OS=Arabidopsis thaliana OX=3702 GN=LTPG5 PE=2 SV=1   | PF14368 | Probable lipid transfer                    |              |
| XP_022014870.1  | sp Q36492 LTPG5_ARATH   | 41.82                 | LTPG5_ARATH Non-specific lipid transfer protein GPI-anchored 5 OS=Arabidopsis thaliana OX=3702 GN=LTPG5 PE=2 SV=1   | PF14368 | Probable lipid transfer                    |              |
| XP_022021911.1  | sp Q0C0B1 LTG10_ARATH   | 40.82                 | LTG10_ARATH Non-specific lipid transfer protein GPI-anchored 10 OS=Arabidopsis thaliana OX=3702 GN=LTGP10 PE=3 SV=1 | PF14368 | Probable lipid transfer                    |              |
| XP_022021912.1  | sp Q0C0B1 LTG10_ARATH   | 51.85                 | LTG10_ARATH Non-specific lipid transfer protein GPI-anchored 10 OS=Arabidopsis thaliana OX=3702 GN=LTGP10 PE=3 SV=1 | PF14368 | Probable lipid transfer                    |              |
| XP_022021913.1  | sp Q0C0B1 LTG10_ARATH   | 51.9                  | LTG10_ARATH Non-specific lipid transfer protein GPI-anchored 10 OS=Arabidopsis thaliana OX=3702 GN=LTGP10 PE=3 SV=1 | PF14368 | Probable lipid transfer                    |              |
| XP_022021914.1  | sp Q0C0B1 LTG10_ARATH   | 51.9                  | LTG10_ARATH Non-specific lipid transfer protein GPI-anchored 10 OS=Arabidopsis thaliana OX=3702 GN=LTGP10 PE=3 SV=1 | PF14368 | Probable lipid transfer                    |              |
| XP_022029622.1  | sp Q08RV93 LBPE5_ARATH  | 70                    | LBPE5_ARATH Putative lipid-binding protein At4g00165 OS=Arabidopsis thaliana OX=3702 GN=At4g00165 PE=2 SV=1         | PF14547 | Hydrophobic seed protein                   |              |
| XP_022035384.1  | sp Q36492 LTPG5_ARATH   | 51.79                 | LTG13_ARATH Non-specific lipid transfer protein GPI-anchored 13 OS=Arabidopsis thaliana OX=3702 GN=LTGP13 PE=2 SV=1 | PF14368 | Probable lipid transfer                    |              |
| XP_022035551.1  | sp Q7EB72 TG15_ARATH    | 40.44                 | LTG15_ARATH Non-specific lipid transfer protein GPI-anchored 15 OS=Arabidopsis thaliana OX=3702 GN=LTGP15 PE=2 SV=1 | PF14368 | Probable lipid transfer                    |              |
| XP_022035552.1  | sp Q7EB72 TG15_ARATH    | 39.34                 | LTG15_ARATH Non-specific lipid transfer protein GPI-anchored 15 OS=Arabidopsis thaliana OX=3702 GN=LTGP15 PE=2 SV=1 | PF14368 | Probable lipid transfer                    |              |
| XP_035838717.1  | sp Q36492 LTPG5_ARATH   | 57.04                 | LTPG5_ARATH Non-specific lipid transfer protein GPI-anchored 5 OS=Arabidopsis thaliana OX=3702 GN=LTPG5 PE=2 SV=1   | PF14368 | Probable lipid transfer                    |              |

**Supplementary Table S4:** Ratio between neutral mutation and purifying selection for each HaLTPs combination. In case of impossibility to estimate Kn/Ks, HaLTPs combination was not showed

| HaLTPs comparison             | Kn     | Ks      | Kn/Ks   | Duplication events |
|-------------------------------|--------|---------|---------|--------------------|
| XP_022002416.1 XP_022002417.1 | 0.0026 | 0.0105  | 0.24762 | TANDEM             |
| XP_022010295.2 XP_022013560.1 | 0.3241 | 0.6307  | 0.51387 | TANDEM             |
| XP_022010294.1 XP_022010296.1 | 0.3114 | 0.5356  | 0.5814  | TANDEM             |
| XP_022008275.1 XP_022008276.2 | 0.5533 | 0.9201  | 0.60135 | TANDEM             |
| XP_022002417.1 XP_022004455.1 | 0.2292 | 0.3775  | 0.60715 | TANDEM             |
| XP_022010296.1 XP_022013558.1 | 0.1424 | 0.2061  | 0.69093 | TANDEM             |
| XP_022002420.1 XP_022002421.1 | 0.2139 | 0.3074  | 0.69584 | TANDEM             |
| XP_021981395.1 XP_021981407.1 | 0.3141 | 0.4156  | 0.75577 | TANDEM             |
| XP_021993620.1 XP_021995116.1 | 0.8869 | 1.0795  | 0.82158 | TANDEM             |
| XP_022010292.1 XP_022013558.1 | 0.0748 | 0.0843  | 0.88731 | TANDEM             |
| XP_022033162.1 XP_022039074.2 | 0.3668 | 0.3914  | 0.93715 | TANDEM             |
| XP_022006926.1 XP_022006927.1 | 0.5174 | 0.5227  | 0.98986 | TANDEM             |
| XP_022009213.1 XP_035838717.1 | 0.0211 | 0.0202  | 1.04455 | TANDEM             |
| XP_021973854.1 XP_021973855.1 | 1.0329 | 0.9546  | 1.08202 | TANDEM             |
| XP_021989736.1 XP_021989737.1 | 0.3229 | 0.2972  | 1.08647 | TANDEM             |
| XP_021993220.1 XP_021993221.1 | 0.5966 | 0.4756  | 1.25442 | TANDEM             |
| XP_021989735.1 XP_021989736.1 | 0.1227 | 0.094   | 1.30532 | TANDEM             |
| XP_021987457.1 XP_021987458.1 | 0.017  | 0.0124  | 1.37097 | TANDEM             |
| XP_022013182.1 XP_022013183.1 | 0.0157 | 0.0114  | 1.37719 | TANDEM             |
| XP_022002415.1 XP_022002416.1 | 0.0286 | 0.0054  | 5.2963  | TANDEM             |
| XP_022010101.1 XP_022034230.1 | 0.7672 | 1.4877  | 0.5157  | WGD                |
| XP_022000196.1 XP_022022835.1 | 1.1307 | 1.6389  | 0.68991 | WGD                |
| XP_021984981.2 XP_021992525.1 | 0.8619 | 1.248   | 0.69063 | WGD                |
| XP_022002419.1 XP_022029738.1 | 0.4368 | 0.511   | 0.85479 | WGD                |
| XP_021981388.1 XP_022009213.1 | 0.6646 | 0.7521  | 0.88366 | WGD                |
| XP_022002421.1 XP_022029740.1 | 0.3881 | 0.401   | 0.96783 | WGD                |
| XP_021993622.1 XP_022013239.1 | 1.4256 | 1.462   | 0.9751  | WGD                |
| XP_021992525.1 XP_022035551.1 | 0.8803 | 0.8803  | 1       | WGD                |
| XP_021973854.1 XP_022006327.1 | 0.6847 | 0.6605  | 1.03664 | WGD                |
| XP_021989735.1 XP_022021914.1 | 1.2851 | 27.5526 | 0.04664 |                    |
| XP_021993052.1 XP_021993620.1 | 1.4095 | 27.5526 | 0.05116 |                    |
| XP_022029622.1 XP_035833070.1 | 1.6523 | 27.5526 | 0.05997 |                    |
| XP_021993222.1 XP_022004980.1 | 1.6539 | 27.5526 | 0.06003 |                    |
| XP_021981395.1 XP_022006327.1 | 1.6855 | 27.5526 | 0.06117 |                    |
| XP_021968895.1 XP_022010616.1 | 0.8625 | 4.7228  | 0.18262 |                    |
| XP_021989734.1 XP_022004979.1 | 1.0399 | 5.2195  | 0.19923 |                    |
| XP_022010616.1 XP_022013182.1 | 1.0742 | 5.2692  | 0.20386 |                    |
| XP_022006668.1 XP_022010101.1 | 1.0795 | 5.2195  | 0.20682 |                    |
| XP_022022835.1 XP_022026964.1 | 1.1104 | 5.3452  | 0.20774 |                    |
| XP_022010292.1 XP_035842399.1 | 0.9588 | 4.4973  | 0.21319 |                    |
| XP_022010296.1 XP_022018622.1 | 1.0349 | 4.8235  | 0.21455 |                    |
| XP_021984981.2 XP_022010294.1 | 1.1562 | 5.3524  | 0.21602 |                    |
| XP_021981395.1 XP_021987457.1 | 1.2002 | 5.5412  | 0.2166  |                    |
| XP_022010295.2 XP_022037775.1 | 1.0446 | 4.771   | 0.21895 |                    |
| XP_022010292.1 XP_022035551.1 | 1.0569 | 4.6319  | 0.22818 |                    |
| XP_022015084.1 XP_022029740.1 | 0.9477 | 4.072   | 0.23274 |                    |
| XP_021981388.1 XP_022002416.1 | 0.9409 | 4.0088  | 0.23471 |                    |
| XP_022002419.1 XP_022034230.1 | 0.8964 | 3.7903  | 0.2365  |                    |
| XP_022002417.1 XP_035838717.1 | 0.9211 | 3.8821  | 0.23727 |                    |
| XP_021984981.2 XP_022002420.1 | 1.0846 | 4.5461  | 0.23858 |                    |
| XP_021986500.1 XP_022026963.1 | 1.1893 | 4.956   | 0.23997 |                    |
| XP_021981388.1 XP_022002415.1 | 0.9477 | 3.8947  | 0.24333 |                    |
| XP_022002420.1 XP_022009213.1 | 0.8848 | 3.6091  | 0.24516 |                    |
| XP_021973011.1 XP_022034230.1 | 1.0431 | 4.2519  | 0.24533 |                    |
| XP_022033162.1 XP_035835830.1 | 0.6355 | 2.5851  | 0.24583 |                    |
| XP_021989736.1 XP_022010616.1 | 1.162  | 4.6889  | 0.24782 |                    |
| XP_021986500.1 XP_022013558.1 | 0.9019 | 3.5843  | 0.25163 |                    |
| XP_022002416.1 XP_035838717.1 | 0.8935 | 3.5353  | 0.25274 |                    |
| XP_021989733.1 XP_021995117.1 | 0.9905 | 3.9106  | 0.25329 |                    |
| XP_021981395.1 XP_022018622.1 | 1.1964 | 4.5869  | 0.26083 |                    |
| XP_022008276.2 XP_022029738.1 | 1.0526 | 4.021   | 0.26178 |                    |
| XP_022000196.1 XP_022010292.1 | 1.2054 | 4.5803  | 0.26317 |                    |
| XP_021988229.1 XP_021989734.1 | 1.133  | 4.2951  | 0.26379 |                    |
| XP_021986500.1 XP_021995117.1 | 1.0081 | 3.7845  | 0.26638 |                    |
| XP_021993620.1 XP_022037775.1 | 1.3846 | 5.1846  | 0.26706 |                    |
| XP_021981407.1 XP_022002416.1 | 0.9008 | 3.3704  | 0.26727 |                    |
| XP_021993621.2 XP_022010294.1 | 1.0663 | 3.9547  | 0.26963 |                    |
| XP_021993620.1 XP_022013560.1 | 0.9764 | 3.6212  | 0.26963 |                    |
| XP_022004455.1 XP_022039074.2 | 0.6076 | 2.2342  | 0.27195 |                    |
| XP_021987458.1 XP_022013560.1 | 1.028  | 3.7428  | 0.27466 |                    |
| XP_022002415.1 XP_022037775.1 | 0.9996 | 3.6308  | 0.27531 |                    |
| XP_021981407.1 XP_022002417.1 | 0.932  | 3.3665  | 0.27685 |                    |
| XP_022008275.1 XP_022021911.1 | 1.096  | 3.9392  | 0.27823 |                    |
| XP_021976022.1 XP_022006327.1 | 1.5694 | 5.6402  | 0.27825 |                    |
| XP_021986500.1 XP_022013560.1 | 0.973  | 3.4905  | 0.27876 |                    |
| XP_022002419.1 XP_022013183.1 | 1.1655 | 4.1618  | 0.28005 |                    |
| XP_021981388.1 XP_022010292.1 | 1.0306 | 3.6636  | 0.28131 |                    |
| XP_021973854.1 XP_022010101.1 | 1.1759 | 4.1381  | 0.28416 |                    |
| XP_022002420.1 XP_022008275.1 | 1.0073 | 3.5321  | 0.28518 |                    |
| XP_021969020.1 XP_022013183.1 | 1.2765 | 4.4727  | 0.2854  |                    |
| XP_021981388.1 XP_022033162.1 | 1.1695 | 4.0947  | 0.28561 |                    |
| XP_021992525.1 XP_022010616.1 | 1.1554 | 4.0377  | 0.28615 |                    |
| XP_022004979.1 XP_022010295.2 | 0.8176 | 2.8444  | 0.28744 |                    |

|                               |        |        |         |
|-------------------------------|--------|--------|---------|
| XP_022004455.1 XP_022033162.1 | 0.6581 | 2.2834 | 0.28821 |
| XP_021992525.1 XP_022002416.1 | 1.2388 | 4.2883 | 0.28888 |
| XP_021981407.1 XP_022002415.1 | 0.9164 | 3.1576 | 0.29022 |
| XP_021993222.1 XP_021995117.1 | 1.1244 | 3.8496 | 0.29208 |
| XP_022000224.2 XP_022010294.1 | 0.7496 | 2.5637 | 0.29239 |
| XP_022008275.1 XP_022021914.1 | 1.0652 | 3.6371 | 0.29287 |
| XP_021989735.1 XP_035833070.1 | 1.3893 | 4.7365 | 0.29332 |
| XP_021988953.1 XP_021993283.1 | 1.468  | 4.9973 | 0.29376 |
| XP_021981388.1 XP_021986500.1 | 0.8435 | 2.8667 | 0.29424 |
| XP_022029622.1 XP_022033162.1 | 1.312  | 4.4412 | 0.29542 |
| XP_021981407.1 XP_022002418.1 | 0.9106 | 3.0812 | 0.29553 |
| XP_021973316.1 XP_021981388.1 | 1.1336 | 3.8295 | 0.29602 |
| XP_021981407.1 XP_022004455.1 | 0.9822 | 3.3105 | 0.29669 |
| XP_022010294.1 XP_022037775.1 | 1.1753 | 3.9547 | 0.29719 |
| XP_022002421.1 XP_022013183.1 | 1.2969 | 4.3615 | 0.29735 |
| XP_021984981.2 XP_022002419.1 | 1.0133 | 3.4063 | 0.29748 |
| XP_021989736.1 XP_022004455.1 | 0.8849 | 2.9678 | 0.29817 |
| XP_021995117.1 XP_022033162.1 | 1.0367 | 3.4539 | 0.30015 |
| XP_021981407.1 XP_022010919.1 | 1.1952 | 3.9719 | 0.30091 |
| XP_021981395.1 XP_021985239.1 | 1.0094 | 3.3529 | 0.30105 |
| XP_021995117.1 XP_022018622.1 | 1.167  | 3.8748 | 0.30118 |
| XP_022010292.1 XP_035835830.1 | 0.6228 | 2.0637 | 0.30179 |
| XP_022026964.1 XP_022035551.1 | 1.3869 | 4.5935 | 0.30193 |
| XP_022026964.1 XP_022035552.1 | 1.3869 | 4.5935 | 0.30193 |
| XP_021993222.1 XP_022001254.1 | 1.3304 | 4.3956 | 0.30267 |
| XP_022004980.1 XP_022021912.1 | 1.302  | 4.2942 | 0.3032  |
| XP_022013558.1 XP_035842399.1 | 0.9428 | 3.1014 | 0.30399 |
| XP_021981395.1 XP_022002420.1 | 0.9782 | 3.2178 | 0.304   |
| XP_021989736.1 XP_022000224.2 | 1.1209 | 3.6837 | 0.30429 |
| XP_022005608.1 XP_022015084.1 | 1.1839 | 3.8821 | 0.30496 |
| XP_021986500.1 XP_022010101.1 | 1.0835 | 3.5493 | 0.30527 |
| XP_021993621.2 XP_022006927.1 | 0.9456 | 3.0971 | 0.30532 |
| XP_021989734.1 XP_022002418.1 | 0.9704 | 3.1693 | 0.30619 |
| XP_021969020.1 XP_022013182.1 | 1.2542 | 4.0857 | 0.30697 |
| XP_022008275.1 XP_022029622.1 | 1.0918 | 3.5521 | 0.30737 |
| XP_021984766.1 XP_022004455.1 | 1.035  | 3.3634 | 0.30772 |
| XP_022002418.1 XP_022029622.1 | 0.8627 | 2.8033 | 0.30774 |
| XP_022010616.1 XP_022013183.1 | 1.1746 | 3.8137 | 0.30799 |
| XP_022002417.1 XP_022009213.1 | 0.9743 | 3.1436 | 0.30993 |
| XP_022010616.1 XP_022013558.1 | 0.8364 | 2.6965 | 0.31018 |
| XP_021973316.1 XP_021981626.1 | 1.4026 | 4.5161 | 0.31058 |
| XP_022000224.2 XP_022013560.1 | 0.8184 | 2.6321 | 0.31093 |
| XP_022002416.1 XP_022029622.1 | 0.8555 | 2.7444 | 0.31173 |
| XP_022008275.1 XP_022021913.1 | 1.0733 | 3.4387 | 0.31212 |
| XP_021981395.1 XP_022029622.1 | 1.1705 | 3.7462 | 0.31245 |
| XP_021989735.1 XP_022021911.1 | 1.2581 | 4.0163 | 0.31325 |
| XP_021981407.1 XP_021995117.1 | 1.0313 | 3.2893 | 0.31353 |
| XP_021986500.1 XP_022002420.1 | 0.782  | 2.4902 | 0.31403 |
| XP_021989733.1 XP_022010616.1 | 1.254  | 3.9864 | 0.31457 |
| XP_021981407.1 XP_022015084.1 | 1.0642 | 3.3816 | 0.3147  |
| XP_021993620.1 XP_022010294.1 | 1.066  | 3.3831 | 0.3151  |
| XP_021989734.1 XP_021993620.1 | 1.1196 | 3.5431 | 0.31599 |
| XP_022008276.2 XP_022010295.2 | 0.9891 | 3.1288 | 0.31613 |
| XP_022010292.1 XP_022026963.1 | 1.0193 | 3.2178 | 0.31677 |
| XP_022010292.1 XP_022034230.1 | 0.7774 | 2.4524 | 0.317   |
| XP_022039074.2 XP_035835830.1 | 0.5955 | 1.868  | 0.31879 |
| XP_022006927.1 XP_022033162.1 | 1.0171 | 3.1885 | 0.31899 |
| XP_021972810.1 XP_022015084.1 | 1.0093 | 3.149  | 0.32051 |
| XP_021981626.1 XP_021993621.2 | 1.5034 | 4.6802 | 0.32123 |
| XP_021978807.1 XP_022013558.1 | 0.7649 | 2.378  | 0.32166 |
| XP_021978807.1 XP_022010292.1 | 0.8266 | 2.5672 | 0.32199 |
| XP_022014870.1 XP_022034230.1 | 1.1899 | 3.688  | 0.32264 |
| XP_022000224.2 XP_035835830.1 | 0.8622 | 2.6704 | 0.32287 |
| XP_021989737.1 XP_022015084.1 | 1.2016 | 3.7206 | 0.32296 |
| XP_021993052.1 XP_022015084.1 | 1.0691 | 3.3069 | 0.32329 |
| XP_022013558.1 XP_035838717.1 | 0.9983 | 3.0856 | 0.32354 |
| XP_021989735.1 XP_022002416.1 | 0.9266 | 2.861  | 0.32387 |
| XP_021981388.1 XP_022002418.1 | 0.9728 | 3.0025 | 0.324   |
| XP_022001254.1 XP_022035384.1 | 1.1941 | 3.679  | 0.32457 |
| XP_021976022.1 XP_021993551.1 | 1.6058 | 4.9438 | 0.32481 |
| XP_022010616.1 XP_022033162.1 | 1.0831 | 3.332  | 0.32506 |
| XP_022004979.1 XP_022010292.1 | 1.0267 | 3.1567 | 0.32524 |
| XP_022013560.1 XP_022015084.1 | 0.9473 | 2.9059 | 0.32599 |
| XP_021992525.1 XP_022002420.1 | 1.141  | 3.4966 | 0.32632 |
| XP_022004979.1 XP_022006927.1 | 1.0649 | 3.2579 | 0.32687 |
| XP_021984981.2 XP_021988229.1 | 0.9411 | 2.8719 | 0.32769 |
| XP_021984981.2 XP_022002415.1 | 1.0407 | 3.1683 | 0.32847 |
| XP_022018622.1 XP_022026963.1 | 1.2146 | 3.6972 | 0.32852 |
| XP_022004455.1 XP_022006668.1 | 1.0009 | 3.0421 | 0.32902 |
| XP_022002416.1 XP_022008275.1 | 1.0083 | 3.0531 | 0.33025 |
| XP_022002417.1 XP_022008275.1 | 1.0083 | 3.0531 | 0.33025 |
| XP_021981407.1 XP_035833070.1 | 1.3359 | 4.0447 | 0.33028 |
| XP_022010292.1 XP_022033162.1 | 0.7216 | 2.1839 | 0.33042 |
| XP_021968895.1 XP_022034230.1 | 1.0182 | 3.0708 | 0.33157 |
| XP_021986500.1 XP_022008275.1 | 0.8572 | 2.5851 | 0.33159 |
| XP_022013558.1 XP_035835830.1 | 0.6259 | 1.8873 | 0.33164 |
| XP_021981407.1 XP_022013560.1 | 0.9615 | 2.8975 | 0.33184 |
| XP_022001254.1 XP_022021913.1 | 1.2268 | 3.6856 | 0.33286 |

|                               |        |        |         |
|-------------------------------|--------|--------|---------|
| XP_022001254.1 XP_022021914.1 | 1.2268 | 3.6856 | 0.33286 |
| XP_022010294.1 XP_022029622.1 | 1.1147 | 3.342  | 0.33354 |
| XP_022010292.1 XP_022010616.1 | 0.8426 | 2.5255 | 0.33364 |
| XP_022005608.1 XP_022033162.1 | 1.7246 | 5.1479 | 0.33501 |
| XP_021986500.1 XP_022004455.1 | 0.8958 | 2.6726 | 0.33518 |
| XP_022029739.1 XP_022039074.2 | 0.7767 | 2.3143 | 0.33561 |
| XP_022002416.1 XP_022010101.1 | 0.7805 | 2.3177 | 0.33676 |
| XP_022002418.1 XP_022010101.1 | 0.7691 | 2.2703 | 0.33877 |
| XP_021981407.1 XP_021985239.1 | 0.9568 | 2.8236 | 0.33886 |
| XP_022002420.1 XP_022039074.2 | 0.6159 | 1.8171 | 0.33895 |
| XP_022001254.1 XP_022021912.1 | 1.2295 | 3.6164 | 0.33998 |
| XP_021993621.2 XP_022039074.2 | 1.05   | 3.0832 | 0.34056 |
| XP_021989733.1 XP_021993621.2 | 1.1161 | 3.2771 | 0.34058 |
| XP_021989735.1 XP_022002418.1 | 0.9528 | 2.7913 | 0.34135 |
| XP_022004455.1 XP_022026963.1 | 0.9207 | 2.6965 | 0.34144 |
| XP_022010291.1 XP_022033162.1 | 0.7699 | 2.2457 | 0.34283 |
| XP_021989734.1 XP_022000224.2 | 1.1629 | 3.3798 | 0.34407 |
| XP_021984981.2 XP_022006668.1 | 1.4743 | 4.2778 | 0.34464 |
| XP_021981388.1 XP_022004455.1 | 0.9642 | 2.7827 | 0.3465  |
| XP_022004455.1 XP_022029622.1 | 0.8721 | 2.5076 | 0.34778 |
| XP_022008276.2 XP_022013560.1 | 1.0824 | 3.1102 | 0.34802 |
| XP_021988229.1 XP_022026964.1 | 1.1017 | 3.1609 | 0.34854 |
| XP_021988229.1 XP_022035384.1 | 1.577  | 4.5205 | 0.34886 |
| XP_021973011.1 XP_022004980.1 | 1.0457 | 2.9955 | 0.34909 |
| XP_021973011.1 XP_021988953.1 | 1.3374 | 3.824  | 0.34974 |
| XP_021978807.1 XP_022010296.1 | 0.8353 | 2.387  | 0.34994 |
| XP_021988229.1 XP_022010296.1 | 0.8284 | 2.3575 | 0.35139 |
| XP_022029622.1 XP_035835830.1 | 0.9195 | 2.6114 | 0.35211 |
| XP_021995117.1 XP_022010292.1 | 0.773  | 2.1865 | 0.35353 |
| XP_021981407.1 XP_022002420.1 | 0.9178 | 2.5875 | 0.35471 |
| XP_022013239.1 XP_022015084.1 | 1.1658 | 3.2785 | 0.35559 |
| XP_022013558.1 XP_022033162.1 | 0.7605 | 2.1322 | 0.35667 |
| XP_021989736.1 XP_022021914.1 | 1.2542 | 3.5139 | 0.35693 |
| XP_022010296.1 XP_022029739.1 | 0.5905 | 1.6541 | 0.35699 |
| XP_021981395.1 XP_022022835.1 | 1.371  | 3.8393 | 0.3571  |
| XP_022000196.1 XP_022006927.1 | 1.3827 | 3.865  | 0.35775 |
| XP_021986500.1 XP_022015084.1 | 0.9886 | 2.762  | 0.35793 |
| XP_021968895.1 XP_021993621.2 | 1.2435 | 3.4712 | 0.35823 |
| XP_021973011.1 XP_021978842.1 | 1.0839 | 3.0254 | 0.35827 |
| XP_022008276.2 XP_022033162.1 | 1.1367 | 3.1636 | 0.35931 |
| XP_021978807.1 XP_022010294.1 | 0.8692 | 2.4096 | 0.36072 |
| XP_021992525.1 XP_022008275.1 | 1.0576 | 2.9244 | 0.36165 |
| XP_021981388.1 XP_022015084.1 | 1.0107 | 2.7943 | 0.3617  |
| XP_021981395.1 XP_021993620.1 | 0.9817 | 2.711  | 0.36212 |
| XP_021981395.1 XP_022008275.1 | 1.0128 | 2.7915 | 0.36282 |
| XP_021988229.1 XP_022035551.1 | 1.1035 | 3.0413 | 0.36284 |
| XP_021989735.1 XP_022002415.1 | 0.9549 | 2.6287 | 0.36326 |
| XP_021981395.1 XP_021993220.1 | 1.242  | 3.4154 | 0.36365 |
| XP_022029622.1 XP_022029738.1 | 1.0038 | 2.7527 | 0.36466 |
| XP_022010296.1 XP_022029738.1 | 0.5383 | 1.4751 | 0.36492 |
| XP_021989734.1 XP_021993551.1 | 1.2581 | 3.4463 | 0.36506 |
| XP_021993621.2 XP_022010291.1 | 0.997  | 2.7222 | 0.36625 |
| XP_021968895.1 XP_022010291.1 | 0.9139 | 2.4953 | 0.36625 |
| XP_022008276.2 XP_022029739.1 | 1.1783 | 3.2143 | 0.36658 |
| XP_022002415.1 XP_035838717.1 | 0.9103 | 2.4816 | 0.36682 |
| XP_022008276.2 XP_022010292.1 | 1.0008 | 2.7267 | 0.36704 |
| XP_021989735.1 XP_022004455.1 | 0.9235 | 2.5153 | 0.36715 |
| XP_021973855.1 XP_035838717.1 | 1.6206 | 4.4133 | 0.36721 |
| XP_021973854.1 XP_022026964.1 | 1.2857 | 3.4982 | 0.36753 |
| XP_022006668.1 XP_035835830.1 | 0.8616 | 2.3322 | 0.36944 |
| XP_022010295.2 XP_022026963.1 | 1.04   | 2.8074 | 0.37045 |
| XP_022010292.1 XP_022029738.1 | 0.5436 | 1.4656 | 0.37091 |
| XP_021995117.1 XP_022010296.1 | 0.8116 | 2.186  | 0.37127 |
| XP_021993052.1 XP_035838717.1 | 1.1119 | 2.9917 | 0.37166 |
| XP_022008275.1 XP_022010919.1 | 1.0101 | 2.7171 | 0.37176 |
| XP_021973854.1 XP_022001254.1 | 1.4504 | 3.9004 | 0.37186 |
| XP_022010292.1 XP_022029739.1 | 0.5699 | 1.5305 | 0.37236 |
| XP_021981407.1 XP_021993222.1 | 1.2179 | 3.2701 | 0.37244 |
| XP_021978807.1 XP_021995116.1 | 1.4153 | 3.7991 | 0.37254 |
| XP_021978807.1 XP_021984981.2 | 0.9607 | 2.5777 | 0.3727  |
| XP_021973316.1 XP_021986500.1 | 1.1645 | 3.1237 | 0.3728  |
| XP_021981395.1 XP_022029740.1 | 1.1209 | 3.0066 | 0.37281 |
| XP_021968895.1 XP_022006927.1 | 1.075  | 2.8782 | 0.3735  |
| XP_021988229.1 XP_022010616.1 | 0.9389 | 2.5124 | 0.37371 |
| XP_022006926.1 XP_022029622.1 | 1.2483 | 3.339  | 0.37385 |
| XP_021989735.1 XP_021993621.2 | 1.1179 | 2.9871 | 0.37424 |
| XP_022013182.1 XP_022022487.2 | 1.1656 | 3.1138 | 0.37433 |
| XP_021981388.1 XP_022004980.1 | 1.0495 | 2.8017 | 0.37459 |
| XP_021989737.1 XP_022006926.1 | 1.3133 | 3.4966 | 0.37559 |
| XP_021981395.1 XP_022021914.1 | 1.1448 | 3.0431 | 0.3762  |
| XP_021981626.1 XP_022026963.1 | 1.3222 | 3.5146 | 0.3762  |
| XP_021989735.1 XP_022021912.1 | 1.2241 | 3.253  | 0.3763  |
| XP_021988229.1 XP_021995116.1 | 1.2853 | 3.4138 | 0.3765  |
| XP_021984981.2 XP_022000224.2 | 0.9487 | 2.5188 | 0.37665 |
| XP_022008276.2 XP_022010294.1 | 0.9901 | 2.6284 | 0.37669 |
| XP_022034230.1 XP_022035551.1 | 1.2509 | 3.3207 | 0.3767  |
| XP_022034230.1 XP_022035552.1 | 1.2509 | 3.3207 | 0.3767  |
| XP_021973854.1 XP_021985239.1 | 1.6373 | 4.3452 | 0.37681 |



|                               |        |        |         |
|-------------------------------|--------|--------|---------|
| XP_021989734.1 XP_022002417.1 | 0.9685 | 2.5658 | 0.37747 |
| XP_022008275.1 XP_022034230.1 | 1.092  | 2.8905 | 0.37779 |
| XP_022013558.1 XP_022029738.1 | 0.545  | 1.4418 | 0.378   |
| XP_021988229.1 XP_022035552.1 | 1.1023 | 2.9159 | 0.37803 |
| XP_021986500.1 XP_022018622.1 | 1.0749 | 2.8431 | 0.37807 |
| XP_021981626.1 XP_022002419.1 | 0.9029 | 2.3876 | 0.37816 |
| XP_021993052.1 XP_021995116.1 | 1.534  | 4.0554 | 0.37826 |
| XP_022004455.1 XP_022006927.1 | 0.8304 | 2.1937 | 0.37854 |
| XP_022034230.1 XP_035835830.1 | 0.8797 | 2.3214 | 0.37895 |
| XP_022004979.1 XP_035833070.1 | 1.3726 | 3.6212 | 0.37905 |
| XP_021989737.1 XP_022004455.1 | 0.972  | 2.5642 | 0.37907 |
| XP_022004455.1 XP_022006327.1 | 1.2333 | 3.2486 | 0.37964 |
| XP_021978842.1 XP_022026964.1 | 1.2124 | 3.1917 | 0.37986 |
| XP_022015084.1 XP_022022835.1 | 1.129  | 2.9717 | 0.37992 |
| XP_022008276.2 XP_022039085.1 | 1.306  | 3.4362 | 0.38007 |
| XP_021992525.1 XP_021993621.2 | 1.2819 | 3.3634 | 0.38113 |
| XP_021995116.1 XP_022002421.1 | 1.1709 | 3.072  | 0.38115 |
| XP_021989733.1 XP_022010296.1 | 1.0658 | 2.7873 | 0.38238 |
| XP_022010101.1 XP_022029738.1 | 0.8637 | 2.2587 | 0.38239 |
| XP_021989734.1 XP_022002415.1 | 0.97   | 2.5364 | 0.38243 |
| XP_022006927.1 XP_035835830.1 | 0.9885 | 2.5846 | 0.38246 |
| XP_021973011.1 XP_021981388.1 | 0.895  | 2.3394 | 0.38258 |
| XP_021999258.1 XP_022002415.1 | 1.0728 | 2.8001 | 0.38313 |
| XP_021989736.1 XP_022021911.1 | 1.2276 | 3.1947 | 0.38426 |
| XP_022002416.1 XP_022009213.1 | 0.9477 | 2.4659 | 0.38432 |
| XP_021989735.1 XP_022029739.1 | 1.0828 | 2.8162 | 0.38449 |
| XP_021981407.1 XP_022004980.1 | 1.0429 | 2.7122 | 0.38452 |
| XP_021968895.1 XP_022037775.1 | 1.1432 | 2.9647 | 0.3856  |
| XP_021989737.1 XP_022004980.1 | 1.0333 | 2.6774 | 0.38593 |
| XP_022002415.1 XP_022010101.1 | 0.8047 | 2.0846 | 0.38602 |
| XP_021978842.1 XP_022021913.1 | 1.3104 | 3.3941 | 0.38608 |
| XP_021978842.1 XP_022021914.1 | 1.3104 | 3.3941 | 0.38608 |
| XP_021985239.1 XP_035835830.1 | 0.7755 | 2.0083 | 0.38615 |
| XP_022021911.1 XP_022029622.1 | 1.3916 | 3.603  | 0.38623 |
| XP_021993620.1 XP_021995117.1 | 1.0691 | 2.7629 | 0.38695 |
| XP_022008275.1 XP_022029738.1 | 1.0196 | 2.6341 | 0.38708 |
| XP_022002421.1 XP_035833070.1 | 1.1299 | 2.9101 | 0.38827 |
| XP_021993220.1 XP_022029740.1 | 0.9737 | 2.5077 | 0.38828 |
| XP_021978807.1 XP_021993220.1 | 1.2031 | 3.0978 | 0.38837 |
| XP_022013558.1 XP_022029739.1 | 0.5694 | 1.4627 | 0.38928 |
| XP_021988953.1 XP_035842399.1 | 1.5051 | 3.865  | 0.38942 |
| XP_022010101.1 XP_022010295.2 | 1.0246 | 2.6292 | 0.3897  |
| XP_022002419.1 XP_022029622.1 | 0.9286 | 2.382  | 0.38984 |
| XP_021989736.1 XP_021993620.1 | 1.1162 | 2.8619 | 0.39002 |
| XP_021989734.1 XP_022010296.1 | 1.0359 | 2.6557 | 0.39007 |
| XP_022000224.2 XP_022039085.1 | 0.772  | 1.9778 | 0.39033 |
| XP_021969020.1 XP_022014870.1 | 1.3027 | 3.332  | 0.39097 |
| XP_022010101.1 XP_022010296.1 | 0.9122 | 2.3318 | 0.3912  |
| XP_022002420.1 XP_022008276.2 | 1.0712 | 2.731  | 0.39224 |
| XP_022013560.1 XP_035838717.1 | 1.0779 | 2.7412 | 0.39322 |
| XP_021985239.1 XP_022029739.1 | 0.8695 | 2.2105 | 0.39335 |
| XP_022002420.1 XP_035835830.1 | 0.4514 | 1.1475 | 0.39338 |
| XP_021981395.1 XP_021993621.2 | 0.8845 | 2.2478 | 0.3935  |
| XP_022002419.1 XP_022039074.2 | 0.6185 | 1.5716 | 0.39355 |
| XP_021989734.1 XP_021993621.2 | 1.1252 | 2.855  | 0.39412 |
| XP_021993621.2 XP_022013560.1 | 1.0857 | 2.7531 | 0.39436 |
| XP_021984981.2 XP_022006927.1 | 1.3301 | 3.3686 | 0.39485 |
| XP_021986500.1 XP_022021911.1 | 0.809  | 2.0485 | 0.39492 |
| XP_021986500.1 XP_022021913.1 | 0.809  | 2.0485 | 0.39492 |
| XP_021986500.1 XP_022021914.1 | 0.809  | 2.0485 | 0.39492 |
| XP_021988953.1 XP_022000196.1 | 1.178  | 2.9818 | 0.39506 |
| XP_021981395.1 XP_022021913.1 | 1.1476 | 2.9047 | 0.39508 |
| XP_021988229.1 XP_022037775.1 | 1.3791 | 3.4905 | 0.3951  |
| XP_022002421.1 XP_022039074.2 | 0.7149 | 1.8061 | 0.39583 |
| XP_021969020.1 XP_022002420.1 | 0.8828 | 2.2301 | 0.39586 |
| XP_021987457.1 XP_022004455.1 | 0.9986 | 2.518  | 0.39658 |
| XP_021988229.1 XP_021989735.1 | 1.1218 | 2.8284 | 0.39662 |
| XP_021981626.1 XP_022021912.1 | 1.3849 | 3.4905 | 0.39676 |
| XP_021987458.1 XP_022004455.1 | 1.016  | 2.5584 | 0.39712 |
| XP_021989733.1 XP_021993620.1 | 1.0633 | 2.675  | 0.3975  |
| XP_022014870.1 XP_022029740.1 | 1.0735 | 2.6965 | 0.39811 |
| XP_021973011.1 XP_022037775.1 | 1.3992 | 3.5135 | 0.39824 |
| XP_021973855.1 XP_022008275.1 | 1.3354 | 3.3494 | 0.3987  |
| XP_022010101.1 XP_022035552.1 | 1.2566 | 3.1515 | 0.39873 |
| XP_022010296.1 XP_022033162.1 | 0.8619 | 2.1604 | 0.39895 |
| XP_022013558.1 XP_022018622.1 | 0.9628 | 2.4115 | 0.39925 |
| XP_021989735.1 XP_022010292.1 | 0.9895 | 2.475  | 0.3998  |
| XP_021981407.1 XP_021986500.1 | 0.9185 | 2.2952 | 0.40018 |
| XP_021993621.2 XP_021995117.1 | 1.1952 | 2.9843 | 0.4005  |
| XP_022010101.1 XP_022039074.2 | 0.925  | 2.3093 | 0.40055 |
| XP_021973011.1 XP_022026963.1 | 1.2888 | 3.213  | 0.40112 |
| XP_022010101.1 XP_035835830.1 | 0.8089 | 2.0146 | 0.40152 |
| XP_021981388.1 XP_021988229.1 | 1.2339 | 3.0708 | 0.40182 |
| XP_021989734.1 XP_022021912.1 | 1.3709 | 3.4096 | 0.40207 |
| XP_022002415.1 XP_022008275.1 | 1.0203 | 2.5357 | 0.40237 |
| XP_021969020.1 XP_021993622.1 | 1.5322 | 3.8057 | 0.40261 |
| XP_022013182.1 XP_022029740.1 | 1.3223 | 3.279  | 0.40326 |
| XP_021981626.1 XP_021985239.1 | 1.1181 | 2.7714 | 0.40344 |

|                               |        |        |         |
|-------------------------------|--------|--------|---------|
| XP_021973854.1 XP_022004455.1 | 1.1945 | 2.9594 | 0.40363 |
| XP_021981395.1 XP_022004979.1 | 0.9386 | 2.3251 | 0.40368 |
| XP_021972810.1 XP_021993220.1 | 1.112  | 2.7505 | 0.40429 |
| XP_021969020.1 XP_022002415.1 | 0.9161 | 2.2657 | 0.40433 |
| XP_021993620.1 XP_022013558.1 | 0.9895 | 2.4451 | 0.40469 |
| XP_022002417.1 XP_022039074.2 | 0.6401 | 1.5816 | 0.40472 |
| XP_021969020.1 XP_022002416.1 | 0.9509 | 2.3473 | 0.4051  |
| XP_022013183.1 XP_022022487.2 | 1.2389 | 3.0518 | 0.40596 |
| XP_021989737.1 XP_022010294.1 | 0.9222 | 2.271  | 0.40608 |
| XP_022015084.1 XP_022021912.1 | 1.2996 | 3.194  | 0.40689 |
| XP_022000196.1 XP_022004980.1 | 1.234  | 3.0323 | 0.40695 |
| XP_021993620.1 XP_022010296.1 | 0.9882 | 2.4267 | 0.40722 |
| XP_021993221.1 XP_022002419.1 | 0.9664 | 2.3712 | 0.40756 |
| XP_021989733.1 XP_022006926.1 | 1.378  | 3.3811 | 0.40756 |
| XP_021987458.1 XP_021988953.1 | 1.0741 | 2.6349 | 0.40764 |
| XP_022015084.1 XP_035838717.1 | 1.0738 | 2.6328 | 0.40785 |
| XP_021989735.1 XP_022002417.1 | 0.9608 | 2.3554 | 0.40791 |
| XP_022004979.1 XP_022029740.1 | 0.8622 | 2.1128 | 0.40808 |
| XP_021978807.1 XP_021981395.1 | 1.1355 | 2.7785 | 0.40867 |
| XP_022033162.1 XP_022037775.1 | 1.2305 | 3.0104 | 0.40875 |
| XP_022008276.2 XP_022018622.1 | 1.4422 | 3.5263 | 0.40898 |
| XP_021989734.1 XP_022010101.1 | 1.0278 | 2.5117 | 0.4092  |
| XP_021995117.1 XP_022013560.1 | 0.878  | 2.1445 | 0.40942 |
| XP_022010295.2 XP_022014870.1 | 0.8367 | 2.0421 | 0.40973 |
| XP_022013182.1 XP_022026963.1 | 1.2235 | 2.984  | 0.41002 |
| XP_021972810.1 XP_021973854.1 | 1.074  | 2.6163 | 0.4105  |
| XP_021989733.1 XP_022010101.1 | 1.1357 | 2.7657 | 0.41064 |
| XP_022013560.1 XP_022021911.1 | 1.3616 | 3.3152 | 0.41071 |
| XP_022013560.1 XP_022021913.1 | 1.3616 | 3.3152 | 0.41071 |
| XP_022013560.1 XP_022021914.1 | 1.3616 | 3.3152 | 0.41071 |
| XP_022002415.1 XP_022029622.1 | 0.9012 | 2.1937 | 0.41081 |
| XP_021993222.1 XP_022010296.1 | 1.3449 | 3.2721 | 0.41102 |
| XP_022035551.1 XP_035833070.1 | 1.5942 | 3.8764 | 0.41126 |
| XP_022009213.1 XP_022013560.1 | 1.1238 | 2.7292 | 0.41177 |
| XP_021985239.1 XP_022002417.1 | 0.7633 | 1.8537 | 0.41177 |
| XP_022006327.1 XP_022006926.1 | 1.2261 | 2.9714 | 0.41263 |
| XP_021992525.1 XP_022002418.1 | 1.2827 | 3.1074 | 0.41279 |
| XP_021984981.2 XP_022002418.1 | 1.0891 | 2.6366 | 0.41307 |
| XP_022002421.1 XP_022014870.1 | 1.043  | 2.5233 | 0.41335 |
| XP_021993620.1 XP_035833070.1 | 0.8715 | 2.1061 | 0.4138  |
| XP_022010294.1 XP_022034230.1 | 0.9485 | 2.2899 | 0.41421 |
| XP_021978807.1 XP_022010291.1 | 0.9366 | 2.2611 | 0.41422 |
| XP_022029739.1 XP_035838717.1 | 1.0187 | 2.4576 | 0.41451 |
| XP_022002421.1 XP_035838717.1 | 1.0236 | 2.469  | 0.41458 |
| XP_021989735.1 XP_022002420.1 | 0.8934 | 2.1541 | 0.41474 |
| XP_021989735.1 XP_022002419.1 | 0.877  | 2.1107 | 0.4155  |
| XP_021981388.1 XP_022018622.1 | 1.1556 | 2.7812 | 0.4155  |
| XP_022010101.1 XP_022035551.1 | 1.2627 | 3.0383 | 0.41559 |
| XP_021986500.1 XP_022021912.1 | 0.75   | 1.802  | 0.4162  |
| XP_022000196.1 XP_022013558.1 | 1.1684 | 2.8068 | 0.41627 |
| XP_022004980.1 XP_022006926.1 | 1.5274 | 3.6655 | 0.4167  |
| XP_022000196.1 XP_022010295.2 | 1.0041 | 2.4096 | 0.41671 |
| XP_021981407.1 XP_022013558.1 | 0.9154 | 2.1963 | 0.41679 |
| XP_022004979.1 XP_022008276.2 | 1.2189 | 2.9232 | 0.41697 |
| XP_022008276.2 XP_022010291.1 | 1.0618 | 2.544  | 0.41737 |
| XP_022029740.1 XP_022037775.1 | 1.0835 | 2.5953 | 0.41749 |
| XP_021981407.1 XP_022000224.2 | 1.1165 | 2.6713 | 0.41796 |
| XP_021973855.1 XP_022026964.1 | 1.606  | 3.8372 | 0.41853 |
| XP_022001254.1 XP_022021911.1 | 1.2133 | 2.8967 | 0.41886 |
| XP_021984981.2 XP_021993621.2 | 1.0925 | 2.6026 | 0.41977 |
| XP_022035552.1 XP_035833070.1 | 1.6241 | 3.865  | 0.42021 |
| XP_021989735.1 XP_022004980.1 | 0.9454 | 2.2478 | 0.42059 |
| XP_021989736.1 XP_022021912.1 | 1.1943 | 2.8357 | 0.42117 |
| XP_021993620.1 XP_022010292.1 | 1.0191 | 2.4197 | 0.42117 |
| XP_021989736.1 XP_022018622.1 | 1.2445 | 2.9517 | 0.42162 |
| XP_021988953.1 XP_022002419.1 | 1.0973 | 2.6014 | 0.42181 |
| XP_022021913.1 XP_022029622.1 | 1.399  | 3.3141 | 0.42214 |
| XP_022021914.1 XP_022029622.1 | 1.399  | 3.3141 | 0.42214 |
| XP_022002419.1 XP_035838717.1 | 0.9371 | 2.2195 | 0.42221 |
| XP_021988229.1 XP_022002421.1 | 0.766  | 1.8116 | 0.42283 |
| XP_022002417.1 XP_022035551.1 | 0.9446 | 2.2322 | 0.42317 |
| XP_022002417.1 XP_022035552.1 | 0.9446 | 2.2322 | 0.42317 |
| XP_021972810.1 XP_021984766.1 | 1.2482 | 2.9489 | 0.42328 |
| XP_021989736.1 XP_022002416.1 | 0.8636 | 2.0401 | 0.42331 |
| XP_022002419.1 XP_022004980.1 | 1.1478 | 2.7105 | 0.42346 |
| XP_021992525.1 XP_022004455.1 | 1.0392 | 2.4531 | 0.42363 |
| XP_021993620.1 XP_022034230.1 | 1.4138 | 3.332  | 0.42431 |
| XP_022002420.1 XP_022014870.1 | 1.1201 | 2.637  | 0.42476 |
| XP_021973316.1 XP_022029622.1 | 1.1889 | 2.7984 | 0.42485 |
| XP_021986500.1 XP_035835830.1 | 0.8199 | 1.9237 | 0.42621 |
| XP_021993620.1 XP_022033162.1 | 1.144  | 2.684  | 0.42623 |
| XP_022002416.1 XP_022039074.2 | 0.6391 | 1.4988 | 0.42641 |
| XP_021993620.1 XP_022029739.1 | 1.1393 | 2.6718 | 0.42642 |
| XP_022010294.1 XP_035835830.1 | 0.7413 | 1.7384 | 0.42643 |
| XP_022010295.2 XP_022033162.1 | 0.8451 | 1.9817 | 0.42645 |
| XP_021987457.1 XP_022026963.1 | 1.3813 | 3.2381 | 0.42658 |
| XP_021968895.1 XP_022006926.1 | 0.961  | 2.2526 | 0.42662 |
| XP_021985239.1 XP_022035384.1 | 1.4762 | 3.4596 | 0.4267  |

|                               |        |        |         |
|-------------------------------|--------|--------|---------|
| XP_021978807.1 XP_022029622.1 | 1.2054 | 2.8241 | 0.42683 |
| XP_021986500.1 XP_021993620.1 | 1.3661 | 3.1954 | 0.42752 |
| XP_021989737.1 XP_022029739.1 | 1.1036 | 2.5783 | 0.42803 |
| XP_021978842.1 XP_021987458.1 | 1.2468 | 2.9127 | 0.42806 |
| XP_022002415.1 XP_022039074.2 | 0.6295 | 1.4706 | 0.42806 |
| XP_022002417.1 XP_022034230.1 | 0.9308 | 2.1737 | 0.42821 |
| XP_021989736.1 XP_022002418.1 | 0.8832 | 2.0617 | 0.42838 |
| XP_022010101.1 XP_022029740.1 | 0.8926 | 2.0773 | 0.42969 |
| XP_022002420.1 XP_022033162.1 | 0.6632 | 1.5432 | 0.42976 |
| XP_022029739.1 XP_035833070.1 | 1.3004 | 3.0257 | 0.42978 |
| XP_021973011.1 XP_021993620.1 | 1.2135 | 2.817  | 0.43078 |
| XP_022002418.1 XP_022008275.1 | 1.0257 | 2.381  | 0.43079 |
| XP_021981388.1 XP_021985239.1 | 0.954  | 2.2144 | 0.43082 |
| XP_021989736.1 XP_022033162.1 | 1.1328 | 2.6288 | 0.43092 |
| XP_021968895.1 XP_022035384.1 | 1.3394 | 3.1045 | 0.43144 |
| XP_021993620.1 XP_022014870.1 | 1.2953 | 3      | 0.43177 |
| XP_022013558.1 XP_022034230.1 | 0.8106 | 1.8774 | 0.43177 |
| XP_021989736.1 XP_022002415.1 | 0.8812 | 2.0405 | 0.43185 |
| XP_022002419.1 XP_022006668.1 | 1.0056 | 2.328  | 0.43196 |
| XP_022006668.1 XP_022008276.2 | 1.1922 | 2.7597 | 0.432   |
| XP_022035551.1 XP_035842399.1 | 1.4644 | 3.3894 | 0.43205 |
| XP_022002420.1 XP_022006668.1 | 0.9442 | 2.1798 | 0.43316 |
| XP_022002421.1 XP_022010101.1 | 0.926  | 2.1351 | 0.4337  |
| XP_021968895.1 XP_022015084.1 | 1.0937 | 2.5194 | 0.43411 |
| XP_021984981.2 XP_022002416.1 | 1.0799 | 2.4862 | 0.43436 |
| XP_021984981.2 XP_022010296.1 | 1.2186 | 2.8015 | 0.43498 |
| XP_022005608.1 XP_022010616.1 | 1.1625 | 2.6704 | 0.43533 |
| XP_022004979.1 XP_035835830.1 | 1.0391 | 2.3835 | 0.43596 |
| XP_022015084.1 XP_022033162.1 | 1.0695 | 2.4531 | 0.43598 |
| XP_021986500.1 XP_022010292.1 | 0.9114 | 2.0888 | 0.43633 |
| XP_021981407.1 XP_022029739.1 | 1.1699 | 2.6794 | 0.43663 |
| XP_021989733.1 XP_021993551.1 | 1.1937 | 2.7334 | 0.43671 |
| XP_022010919.1 XP_035842399.1 | 1.8284 | 4.1832 | 0.43708 |
| XP_021989736.1 XP_022002419.1 | 0.9224 | 2.1101 | 0.43714 |
| XP_021989737.1 XP_021995117.1 | 0.999  | 2.2834 | 0.43751 |
| XP_021993052.1 XP_022035384.1 | 1.1796 | 2.6939 | 0.43788 |
| XP_021981626.1 XP_022021913.1 | 1.4592 | 3.3306 | 0.43812 |
| XP_021987457.1 XP_022014870.1 | 1.2124 | 2.7657 | 0.43837 |
| XP_021987458.1 XP_022014870.1 | 1.2124 | 2.7657 | 0.43837 |
| XP_022010294.1 XP_022010616.1 | 0.8852 | 2.0183 | 0.43859 |
| XP_021968895.1 XP_022018622.1 | 1.0811 | 2.4646 | 0.43865 |
| XP_022002417.1 XP_022035384.1 | 1.278  | 2.9133 | 0.43868 |
| XP_021978807.1 XP_022010616.1 | 0.8179 | 1.8637 | 0.43886 |
| XP_022002420.1 XP_022004455.1 | 0.1885 | 0.4294 | 0.43898 |
| XP_022009213.1 XP_035835830.1 | 0.9456 | 2.1538 | 0.43904 |
| XP_021969020.1 XP_021978807.1 | 1.1676 | 2.6591 | 0.4391  |
| XP_021984981.2 XP_022029740.1 | 1.1288 | 2.5698 | 0.43926 |
| XP_021972810.1 XP_022004979.1 | 1.0807 | 2.4589 | 0.43951 |
| XP_021981626.1 XP_022002420.1 | 0.9404 | 2.1384 | 0.43977 |
| XP_022035384.1 XP_035842399.1 | 1.6526 | 3.7563 | 0.43995 |
| XP_022013558.1 XP_022014870.1 | 0.7876 | 1.7891 | 0.44022 |
| XP_021968895.1 XP_021973854.1 | 1.2816 | 2.9082 | 0.44068 |
| XP_021993222.1 XP_022029738.1 | 1.1218 | 2.5454 | 0.44072 |
| XP_021972810.1 XP_022013183.1 | 1.4105 | 3.2    | 0.44078 |
| XP_021986500.1 XP_022009213.1 | 0.8648 | 1.9612 | 0.44095 |
| XP_021986500.1 XP_035838717.1 | 0.8648 | 1.9612 | 0.44095 |
| XP_022009213.1 XP_022013558.1 | 1.0392 | 2.3563 | 0.44103 |
| XP_022008276.2 XP_022021912.1 | 1.2916 | 2.9282 | 0.44109 |
| XP_022002418.1 XP_022039074.2 | 0.6198 | 1.4048 | 0.4412  |
| XP_022006927.1 XP_035833070.1 | 1.3315 | 3.0085 | 0.44258 |
| XP_021978807.1 XP_021986500.1 | 0.9726 | 2.1947 | 0.44316 |
| XP_021989734.1 XP_021995117.1 | 0.9685 | 2.1854 | 0.44317 |
| XP_022010295.2 XP_022029738.1 | 0.5897 | 1.3306 | 0.44318 |
| XP_021973011.1 XP_021995116.1 | 1.2702 | 2.866  | 0.4432  |
| XP_022037775.1 XP_022039085.1 | 1.3049 | 2.9421 | 0.44353 |
| XP_022018622.1 XP_022039074.2 | 1.1264 | 2.5383 | 0.44376 |
| XP_021989736.1 XP_022029739.1 | 1.0622 | 2.3936 | 0.44377 |
| XP_022000224.2 XP_022010291.1 | 0.8655 | 1.9486 | 0.44417 |
| XP_022010296.1 XP_022034230.1 | 0.9408 | 2.1181 | 0.44417 |
| XP_021989735.1 XP_022013558.1 | 0.962  | 2.1644 | 0.44446 |
| XP_021995116.1 XP_022021912.1 | 1.7453 | 3.9265 | 0.44449 |
| XP_021978807.1 XP_022005608.1 | 0.9828 | 2.2098 | 0.44475 |
| XP_022002419.1 XP_022009213.1 | 0.9857 | 2.2162 | 0.44477 |
| XP_021987457.1 XP_021988953.1 | 1.0903 | 2.4495 | 0.44511 |
| XP_022002419.1 XP_022033162.1 | 0.6161 | 1.3822 | 0.44574 |
| XP_022000196.1 XP_022021912.1 | 1.1796 | 2.6443 | 0.44609 |
| XP_021973011.1 XP_035838717.1 | 1.03   | 2.3089 | 0.4461  |
| XP_021969020.1 XP_035835830.1 | 1.0033 | 2.2488 | 0.44615 |
| XP_021993621.2 XP_022004979.1 | 1.2634 | 2.8296 | 0.44649 |
| XP_021989733.1 XP_022002419.1 | 0.9144 | 2.0463 | 0.44686 |
| XP_021968895.1 XP_021986500.1 | 0.9285 | 2.0776 | 0.44691 |
| XP_021981388.1 XP_021987458.1 | 1.1336 | 2.5357 | 0.44706 |
| XP_021989733.1 XP_022010294.1 | 0.9904 | 2.2149 | 0.44715 |
| XP_021978842.1 XP_022010616.1 | 1.0055 | 2.2483 | 0.44723 |
| XP_021993620.1 XP_022010616.1 | 1.3251 | 2.9627 | 0.44726 |
| XP_021989737.1 XP_022008275.1 | 1.0799 | 2.4142 | 0.44731 |
| XP_021981388.1 XP_021987457.1 | 1.0868 | 2.4296 | 0.44732 |
| XP_021981407.1 XP_022010295.2 | 1.0515 | 2.3466 | 0.4481  |

|                               |        |        |         |
|-------------------------------|--------|--------|---------|
| XP_022004455.1 XP_022022835.1 | 1.0364 | 2.3129 | 0.4481  |
| XP_021999258.1 XP_022000196.1 | 1.2098 | 2.6986 | 0.44831 |
| XP_022000224.2 XP_022013183.1 | 1.1232 | 2.5045 | 0.44847 |
| XP_022022487.2 XP_035838717.1 | 1.2299 | 2.7412 | 0.44867 |
| XP_022002420.1 XP_022035551.1 | 0.9228 | 2.0524 | 0.44962 |
| XP_022002420.1 XP_022035552.1 | 0.9228 | 2.0524 | 0.44962 |
| XP_021995117.1 XP_022013558.1 | 0.752  | 1.6712 | 0.44998 |
| XP_022033162.1 XP_035838717.1 | 1.1046 | 2.4547 | 0.44999 |
| XP_022004980.1 XP_022026963.1 | 1.332  | 2.9586 | 0.45021 |
| XP_022002421.1 XP_022029622.1 | 0.9602 | 2.1326 | 0.45025 |
| XP_021978842.1 XP_022021911.1 | 1.288  | 2.8605 | 0.45027 |
| XP_022008275.1 XP_022013239.1 | 1.1396 | 2.5305 | 0.45035 |
| XP_021993551.1 XP_022008275.1 | 1.6091 | 3.5716 | 0.45053 |
| XP_022006926.1 XP_035835830.1 | 0.9817 | 2.1773 | 0.45088 |
| XP_022026964.1 XP_035833070.1 | 1.397  | 3.0971 | 0.45107 |
| XP_022004455.1 XP_022039085.1 | 0.5914 | 1.3095 | 0.45162 |
| XP_021981388.1 XP_022002420.1 | 0.9557 | 2.1148 | 0.45191 |
| XP_021973011.1 XP_022006926.1 | 1.1474 | 2.538  | 0.45209 |
| XP_021972810.1 XP_022010101.1 | 0.8325 | 1.8397 | 0.45252 |
| XP_021989735.1 XP_021995117.1 | 1.0272 | 2.2699 | 0.45253 |
| XP_021972810.1 XP_022008276.2 | 1.1138 | 2.4607 | 0.45264 |
| XP_022002418.1 XP_035838717.1 | 0.9518 | 2.1025 | 0.4527  |
| XP_021988229.1 XP_022015084.1 | 1.1385 | 2.5136 | 0.45294 |
| XP_021988953.1 XP_022022835.1 | 1.2815 | 2.829  | 0.45299 |
| XP_021972810.1 XP_022006927.1 | 0.9679 | 2.1348 | 0.45339 |
| XP_021993221.1 XP_022002417.1 | 0.9958 | 2.1955 | 0.45356 |
| XP_021995116.1 XP_022010296.1 | 1.0246 | 2.2588 | 0.4536  |
| XP_021981626.1 XP_021993551.1 | 1.6635 | 3.664  | 0.45401 |
| XP_021969020.1 XP_022037775.1 | 1.2693 | 2.7956 | 0.45403 |
| XP_022013183.1 XP_022026963.1 | 1.2492 | 2.7508 | 0.45412 |
| XP_022002416.1 XP_022035384.1 | 1.2679 | 2.7908 | 0.45431 |
| XP_022035551.1 XP_035835830.1 | 1.0779 | 2.37   | 0.45481 |
| XP_022035552.1 XP_035835830.1 | 1.0779 | 2.37   | 0.45481 |
| XP_021993052.1 XP_022004980.1 | 1.2993 | 2.855  | 0.4551  |
| XP_021972810.1 XP_022001254.1 | 1.0996 | 2.4161 | 0.45511 |
| XP_021968895.1 XP_022010101.1 | 0.9807 | 2.1516 | 0.4558  |
| XP_022000224.2 XP_022013182.1 | 1.0167 | 2.2301 | 0.4559  |
| XP_021989734.1 XP_022033162.1 | 1.1747 | 2.5766 | 0.45591 |
| XP_021989734.1 XP_022010294.1 | 0.972  | 2.1314 | 0.45604 |
| XP_021985239.1 XP_021999258.1 | 1.1172 | 2.4477 | 0.45643 |
| XP_021985239.1 XP_022002416.1 | 0.7614 | 1.6681 | 0.45645 |
| XP_021993620.1 XP_022039085.1 | 1.1941 | 2.6143 | 0.45676 |
| XP_022002416.1 XP_022006668.1 | 1.0163 | 2.224  | 0.45697 |
| XP_022010919.1 XP_022035551.1 | 1.0966 | 2.396  | 0.45768 |
| XP_022010919.1 XP_022035552.1 | 1.0966 | 2.396  | 0.45768 |
| XP_022004980.1 XP_022014870.1 | 1.2627 | 2.7512 | 0.45896 |
| XP_022002416.1 XP_022035551.1 | 0.9463 | 2.0578 | 0.45986 |
| XP_022002416.1 XP_022035552.1 | 0.9463 | 2.0578 | 0.45986 |
| XP_021976022.1 XP_022010296.1 | 0.9586 | 2.084  | 0.45998 |
| XP_021988229.1 XP_021989736.1 | 1.1441 | 2.4869 | 0.46005 |
| XP_021993622.1 XP_022033162.1 | 1.2661 | 2.7512 | 0.4602  |
| XP_022002419.1 XP_022014870.1 | 1.0202 | 2.2165 | 0.46028 |
| XP_021973316.1 XP_022035552.1 | 1.351  | 2.9329 | 0.46064 |
| XP_022010296.1 XP_022014870.1 | 0.9361 | 2.031  | 0.46091 |
| XP_021989736.1 XP_021993551.1 | 1.2717 | 2.7553 | 0.46155 |
| XP_021987458.1 XP_022039074.2 | 1.1784 | 2.5523 | 0.4617  |
| XP_022018622.1 XP_022037775.1 | 1.1222 | 2.429  | 0.462   |
| XP_022015084.1 XP_022039074.2 | 1.055  | 2.2834 | 0.46203 |
| XP_021978842.1 XP_022001254.1 | 1.1224 | 2.429  | 0.46208 |
| XP_022029622.1 XP_022039085.1 | 1.0178 | 2.2    | 0.46264 |
| XP_021972810.1 XP_022010294.1 | 0.7966 | 1.7207 | 0.46295 |
| XP_021985239.1 XP_022002419.1 | 0.7687 | 1.6595 | 0.46321 |
| XP_021993620.1 XP_022006927.1 | 1.2891 | 2.7827 | 0.46326 |
| XP_021973854.1 XP_022039074.2 | 1.3836 | 2.985  | 0.46352 |
| XP_021993622.1 XP_021995116.1 | 1.3334 | 2.8758 | 0.46366 |
| XP_022002418.1 XP_022035551.1 | 1.0011 | 2.159  | 0.46369 |
| XP_022002418.1 XP_022035552.1 | 1.0011 | 2.159  | 0.46369 |
| XP_021978842.1 XP_022015084.1 | 1.0678 | 2.3026 | 0.46374 |
| XP_021981407.1 XP_022039085.1 | 1.291  | 2.7834 | 0.46382 |
| XP_022006927.1 XP_022010292.1 | 0.9188 | 1.9808 | 0.46385 |
| XP_022010292.1 XP_022018622.1 | 0.974  | 2.0996 | 0.4639  |
| XP_021989733.1 XP_022000224.2 | 1.212  | 2.6126 | 0.46391 |
| XP_022002415.1 XP_035833070.1 | 1.2071 | 2.6011 | 0.46407 |
| XP_021988229.1 XP_022004455.1 | 0.6951 | 1.4971 | 0.4643  |
| XP_021989736.1 XP_022002417.1 | 0.8734 | 1.8811 | 0.4643  |
| XP_022002417.1 XP_022006668.1 | 1.0146 | 2.1815 | 0.46509 |
| XP_021969020.1 XP_022010291.1 | 1.2198 | 2.6224 | 0.46515 |
| XP_022002417.1 XP_022006927.1 | 0.9173 | 1.9719 | 0.46519 |
| XP_021988229.1 XP_022010295.2 | 0.834  | 1.7927 | 0.46522 |
| XP_021989733.1 XP_035842399.1 | 1.3899 | 2.9858 | 0.4655  |
| XP_022010616.1 XP_022013560.1 | 0.8844 | 1.8995 | 0.4656  |
| XP_021981626.1 XP_022010101.1 | 1.2589 | 2.7024 | 0.46585 |
| XP_022004980.1 XP_022005608.1 | 1.2424 | 2.6651 | 0.46617 |
| XP_022002419.1 XP_022021912.1 | 1.057  | 2.2667 | 0.46632 |
| XP_022010101.1 XP_022035384.1 | 1.2925 | 2.7716 | 0.46634 |
| XP_022035552.1 XP_035842399.1 | 1.4577 | 3.1229 | 0.46678 |
| XP_021989736.1 XP_035835830.1 | 0.9978 | 2.137  | 0.46692 |
| XP_021981388.1 XP_022008275.1 | 0.9857 | 2.1103 | 0.46709 |

|                               |        |        |         |
|-------------------------------|--------|--------|---------|
| XP_022006927.1 XP_022013558.1 | 0.8752 | 1.8683 | 0.46845 |
| XP_021995117.1 XP_022010616.1 | 0.9697 | 2.07   | 0.46845 |
| XP_021989737.1 XP_022006668.1 | 1.2977 | 2.7604 | 0.47011 |
| XP_022013560.1 XP_022021912.1 | 1.3926 | 2.9614 | 0.47025 |
| XP_021969020.1 XP_022029622.1 | 1.5716 | 3.342  | 0.47026 |
| XP_021987457.1 XP_022009213.1 | 1.0004 | 2.1265 | 0.47044 |
| XP_021993621.2 XP_022009213.1 | 1.1705 | 2.4869 | 0.47067 |
| XP_021985239.1 XP_022002420.1 | 0.7827 | 1.6615 | 0.47108 |
| XP_022000196.1 XP_022009213.1 | 1.3136 | 2.7852 | 0.47164 |
| XP_022010101.1 XP_022013560.1 | 0.839  | 1.7777 | 0.47196 |
| XP_021973316.1 XP_022035551.1 | 1.3546 | 2.8688 | 0.47218 |
| XP_021988229.1 XP_022010292.1 | 0.8247 | 1.7458 | 0.47239 |
| XP_021999258.1 XP_022006327.1 | 1.2576 | 2.6551 | 0.47365 |
| XP_022008275.1 XP_022035384.1 | 1.3381 | 2.8248 | 0.4737  |
| XP_022001254.1 XP_035838717.1 | 1.3177 | 2.7806 | 0.47389 |
| XP_022010294.1 XP_022014870.1 | 1.0792 | 2.2758 | 0.47421 |
| XP_021968895.1 XP_022004980.1 | 1.3373 | 2.8177 | 0.47461 |
| XP_022010295.2 XP_022029739.1 | 0.6526 | 1.3744 | 0.47483 |
| XP_021989737.1 XP_021993052.1 | 1.0784 | 2.2699 | 0.47509 |
| XP_021981395.1 XP_022029739.1 | 1.1318 | 2.382  | 0.47515 |
| XP_021993620.1 XP_022013183.1 | 1.1059 | 2.3265 | 0.47535 |
| XP_021989736.1 XP_021993621.2 | 1.1179 | 2.3516 | 0.47538 |
| XP_021972810.1 XP_022026963.1 | 1.3587 | 2.855  | 0.4759  |
| XP_021995117.1 XP_022029739.1 | 1.0342 | 2.1713 | 0.4763  |
| XP_021976022.1 XP_022004455.1 | 1.1027 | 2.3134 | 0.47666 |
| XP_022001254.1 XP_022004980.1 | 1.2504 | 2.6224 | 0.47682 |
| XP_021981395.1 XP_022021911.1 | 1.1715 | 2.4556 | 0.47707 |
| XP_021995117.1 XP_022010295.2 | 0.7456 | 1.5627 | 0.47712 |
| XP_022002420.1 XP_022010101.1 | 0.8267 | 1.7319 | 0.47734 |
| XP_021968895.1 XP_021989733.1 | 1.1367 | 2.3803 | 0.47754 |
| XP_021995116.1 XP_021999258.1 | 1.3175 | 2.7586 | 0.4776  |
| XP_021989734.1 XP_022006926.1 | 1.2836 | 2.6876 | 0.4776  |
| XP_021989737.1 XP_022026963.1 | 1.5181 | 3.1756 | 0.47805 |
| XP_021978807.1 XP_021995117.1 | 0.8945 | 1.8709 | 0.47811 |
| XP_021986500.1 XP_022002421.1 | 0.8176 | 1.7094 | 0.4783  |
| XP_021985239.1 XP_022022487.2 | 0.9548 | 1.9961 | 0.47833 |
| XP_022000224.2 XP_022013558.1 | 0.8085 | 1.6897 | 0.47849 |
| XP_021972810.1 XP_022004980.1 | 1.3135 | 2.7442 | 0.47865 |
| XP_021989735.1 XP_021993620.1 | 1.104  | 2.3045 | 0.47906 |
| XP_022013182.1 XP_022039085.1 | 1.5829 | 3.3007 | 0.47956 |
| XP_022000224.2 XP_022006327.1 | 1.3988 | 2.9156 | 0.47976 |
| XP_021986500.1 XP_022002416.1 | 0.7796 | 1.6243 | 0.47996 |
| XP_021987458.1 XP_022006327.1 | 1.4052 | 2.9271 | 0.48007 |
| XP_021989734.1 XP_035842399.1 | 1.4873 | 3.0976 | 0.48015 |
| XP_021989737.1 XP_035833070.1 | 1.313  | 2.7341 | 0.48023 |
| XP_021993222.1 XP_022037775.1 | 1.4212 | 2.9594 | 0.48023 |
| XP_022004455.1 XP_022021912.1 | 0.9441 | 1.9643 | 0.48063 |
| XP_022000196.1 XP_022033162.1 | 1.2142 | 2.5255 | 0.48078 |
| XP_022002416.1 XP_022034230.1 | 0.9342 | 1.9417 | 0.48112 |
| XP_021993222.1 XP_022010291.1 | 1.1651 | 2.4215 | 0.48115 |
| XP_022013183.1 XP_022029740.1 | 1.3898 | 2.8838 | 0.48193 |
| XP_021968895.1 XP_022002420.1 | 0.7277 | 1.508  | 0.48256 |
| XP_021968895.1 XP_035838717.1 | 1.2782 | 2.6485 | 0.48261 |
| XP_021995117.1 XP_022008276.2 | 1.0436 | 2.1623 | 0.48263 |
| XP_022001254.1 XP_022010101.1 | 1.3638 | 2.8209 | 0.48346 |
| XP_022000196.1 XP_022004979.1 | 1.1466 | 2.3715 | 0.48349 |
| XP_022010101.1 XP_022039085.1 | 0.9794 | 2.0256 | 0.48351 |
| XP_022013560.1 XP_035842399.1 | 1.0755 | 2.2218 | 0.48407 |
| XP_021984766.1 XP_022014870.1 | 1.0804 | 2.2306 | 0.48435 |
| XP_021988953.1 XP_022004979.1 | 1.1862 | 2.4485 | 0.48446 |
| XP_022018622.1 XP_022026964.1 | 1.396  | 2.8806 | 0.48462 |
| XP_021993620.1 XP_022008276.2 | 1.2111 | 2.4987 | 0.48469 |
| XP_022013182.1 XP_022034230.1 | 1.1072 | 2.2834 | 0.48489 |
| XP_021978842.1 XP_021987457.1 | 1.2401 | 2.5571 | 0.48496 |
| XP_021981395.1 XP_021995116.1 | 1.3016 | 2.6833 | 0.48507 |
| XP_022008275.1 XP_022039085.1 | 1.2015 | 2.4764 | 0.48518 |
| XP_021984981.2 XP_022029739.1 | 1.0526 | 2.1695 | 0.48518 |
| XP_022002416.1 XP_022010294.1 | 0.5475 | 1.1281 | 0.48533 |
| XP_021989733.1 XP_022033162.1 | 1.1216 | 2.3105 | 0.48544 |
| XP_021984981.2 XP_022002417.1 | 1.112  | 2.2904 | 0.4855  |
| XP_022010101.1 XP_022010291.1 | 0.9106 | 1.8738 | 0.48596 |
| XP_021993621.2 XP_022008276.2 | 1.1863 | 2.4404 | 0.48611 |
| XP_022029738.1 XP_035833070.1 | 1.275  | 2.6224 | 0.4862  |
| XP_022029739.1 XP_035835830.1 | 0.5979 | 1.2297 | 0.48622 |
| XP_022001254.1 XP_022005608.1 | 1.1147 | 2.2905 | 0.48666 |
| XP_021981388.1 XP_022029622.1 | 1.1144 | 2.2894 | 0.48677 |
| XP_022013558.1 XP_022039085.1 | 0.6722 | 1.3809 | 0.48678 |
| XP_021995116.1 XP_022002418.1 | 1.1588 | 2.3793 | 0.48703 |
| XP_022010294.1 XP_022010295.2 | 0.3203 | 0.6575 | 0.48715 |
| XP_021973855.1 XP_021981388.1 | 1.6511 | 3.3886 | 0.48725 |
| XP_021973011.1 XP_022010291.1 | 0.8562 | 1.7572 | 0.48725 |
| XP_021987457.1 XP_022013560.1 | 1.052  | 2.1586 | 0.48735 |
| XP_021978807.1 XP_022008275.1 | 1.0721 | 2.1978 | 0.48781 |
| XP_021993551.1 XP_022029622.1 | 1.378  | 2.8246 | 0.48786 |
| XP_022022487.2 XP_022035551.1 | 1.2342 | 2.5296 | 0.4879  |
| XP_021986500.1 XP_022010294.1 | 0.9475 | 1.9409 | 0.48818 |
| XP_021984766.1 XP_022000196.1 | 1.2233 | 2.5045 | 0.48844 |
| XP_022014870.1 XP_022022487.2 | 1.3878 | 2.84   | 0.48866 |

|                |                |        |        |         |
|----------------|----------------|--------|--------|---------|
| XP_022006927.1 | XP_022026964.1 | 1.1118 | 2.2751 | 0.48868 |
| XP_022002419.1 | XP_022006927.1 | 0.9282 | 1.8964 | 0.48945 |
| XP_021981626.1 | XP_022029740.1 | 1.1977 | 2.4454 | 0.48978 |
| XP_022033162.1 | XP_022035384.1 | 1.4015 | 2.861  | 0.48986 |
| XP_021999258.1 | XP_022010616.1 | 1.4703 | 2.9983 | 0.49038 |
| XP_022010294.1 | XP_022035384.1 | 1.1704 | 2.3866 | 0.4904  |
| XP_021978842.1 | XP_021989736.1 | 0.937  | 1.9098 | 0.49063 |
| XP_021986500.1 | XP_022034230.1 | 1.1765 | 2.3952 | 0.49119 |
| XP_021981407.1 | XP_021981626.1 | 1.0142 | 2.0642 | 0.49133 |
| XP_021989736.1 | XP_022004980.1 | 0.9908 | 2.0163 | 0.4914  |
| XP_022006926.1 | XP_022010101.1 | 0.3421 | 0.6961 | 0.49145 |
| XP_021981395.1 | XP_021984766.1 | 0.9881 | 2.0104 | 0.49149 |
| XP_022010919.1 | XP_035838717.1 | 0.9705 | 1.9744 | 0.49154 |
| XP_022010292.1 | XP_022029740.1 | 0.5998 | 1.2193 | 0.49192 |
| XP_021993220.1 | XP_022004455.1 | 1      | 2.031  | 0.49237 |
| XP_022008275.1 | XP_022014870.1 | 1.2931 | 2.6224 | 0.4931  |
| XP_021973316.1 | XP_021981395.1 | 1.0303 | 2.0888 | 0.49325 |
| XP_022010919.1 | XP_022013182.1 | 1.2882 | 2.6114 | 0.4933  |
| XP_022002418.1 | XP_022006668.1 | 0.9415 | 1.9082 | 0.4934  |
| XP_021985239.1 | XP_022000196.1 | 1.2862 | 2.6062 | 0.49352 |
| XP_022013560.1 | XP_035835830.1 | 0.6696 | 1.3564 | 0.49366 |
| XP_021989734.1 | XP_022034230.1 | 1.2297 | 2.4908 | 0.4937  |
| XP_021989733.1 | XP_022006327.1 | 1.322  | 2.6771 | 0.49382 |
| XP_021988953.1 | XP_022004455.1 | 1.0309 | 2.0837 | 0.49474 |
| XP_021973011.1 | XP_021993222.1 | 1.4926 | 3.0163 | 0.49484 |
| XP_021978807.1 | XP_021989736.1 | 1.1514 | 2.3251 | 0.4952  |
| XP_021981388.1 | XP_022039085.1 | 1.0929 | 2.2056 | 0.49551 |
| XP_022039085.1 | XP_035838717.1 | 1.2302 | 2.4826 | 0.49553 |
| XP_021989736.1 | XP_022013558.1 | 0.9614 | 1.9395 | 0.49569 |
| XP_021992525.1 | XP_022006327.1 | 1.1073 | 2.2331 | 0.49586 |
| XP_021989737.1 | XP_021993620.1 | 1.1224 | 2.2633 | 0.49591 |
| XP_021993221.1 | XP_022015084.1 | 1.3064 | 2.6311 | 0.49652 |
| XP_021989733.1 | XP_021993052.1 | 1.1198 | 2.2552 | 0.49654 |
| XP_021978842.1 | XP_022014870.1 | 1.101  | 2.2171 | 0.49659 |
| XP_021992525.1 | XP_022022487.2 | 1.319  | 2.6557 | 0.49667 |
| XP_021989733.1 | XP_022004455.1 | 0.9521 | 1.916  | 0.49692 |
| XP_022000224.2 | XP_022010295.2 | 0.8738 | 1.7584 | 0.49693 |
| XP_021987457.1 | XP_035838717.1 | 0.9635 | 1.9375 | 0.49729 |
| XP_021969020.1 | XP_022002417.1 | 0.971  | 1.9509 | 0.49772 |
| XP_022010616.1 | XP_022021912.1 | 1.1637 | 2.338  | 0.49773 |
| XP_021987457.1 | XP_022021913.1 | 1.2253 | 2.4596 | 0.49817 |
| XP_022002420.1 | XP_022006927.1 | 0.9942 | 1.9951 | 0.49832 |
| XP_022008275.1 | XP_022026964.1 | 0.7684 | 1.5417 | 0.49841 |
| XP_021989734.1 | XP_022013560.1 | 0.9664 | 1.9387 | 0.49848 |
| XP_021981407.1 | XP_021988229.1 | 1.2604 | 2.5284 | 0.4985  |
| XP_022013182.1 | XP_035835830.1 | 1.2442 | 2.4941 | 0.49886 |
| XP_021993621.2 | XP_022004455.1 | 0.9039 | 1.8117 | 0.49892 |
| XP_022010296.1 | XP_022039074.2 | 0.733  | 1.4672 | 0.49959 |
| XP_021999258.1 | XP_022010291.1 | 1.04   | 2.0815 | 0.49964 |
| XP_021984981.2 | XP_021993622.1 | 1.5881 | 3.1756 | 0.50009 |
| XP_021981626.1 | XP_022021911.1 | 1.4086 | 2.8165 | 0.50012 |
| XP_021978807.1 | XP_022010295.2 | 0.8675 | 1.7337 | 0.50037 |
| XP_022006927.1 | XP_022029738.1 | 0.9414 | 1.8812 | 0.50043 |
| XP_021988229.1 | XP_022002420.1 | 0.7525 | 1.503  | 0.50067 |
| XP_022010295.2 | XP_022034230.1 | 0.9055 | 1.8083 | 0.50075 |
| XP_021989733.1 | XP_022013560.1 | 0.9735 | 1.9432 | 0.50098 |
| XP_021993621.2 | XP_035833070.1 | 0.5565 | 1.1103 | 0.50122 |
| XP_021978807.1 | XP_022026964.1 | 1.3975 | 2.7852 | 0.50176 |
| XP_021988953.1 | XP_022015084.1 | 1.1895 | 2.37   | 0.5019  |
| XP_021981388.1 | XP_022004979.1 | 0.966  | 1.9237 | 0.50216 |
| XP_021989734.1 | XP_022004455.1 | 0.9974 | 1.9858 | 0.50227 |
| XP_021989735.1 | XP_022010296.1 | 1.0218 | 2.0342 | 0.50231 |
| XP_022002421.1 | XP_022006927.1 | 0.8445 | 1.6811 | 0.50235 |
| XP_022006327.1 | XP_022037775.1 | 1.18   | 2.3482 | 0.50251 |
| XP_022010294.1 | XP_022033162.1 | 0.8477 | 1.6849 | 0.50312 |
| XP_021993621.2 | XP_022022487.2 | 1.6889 | 3.3552 | 0.50337 |
| XP_022009213.1 | XP_022029739.1 | 1.0735 | 2.1324 | 0.50342 |
| XP_022008275.1 | XP_022021912.1 | 1.0519 | 2.0871 | 0.504   |
| XP_022029740.1 | XP_035835830.1 | 0.5068 | 1.0054 | 0.50408 |
| XP_022029738.1 | XP_035838717.1 | 1.1309 | 2.2434 | 0.5041  |
| XP_022002418.1 | XP_022009213.1 | 1.0124 | 2.0076 | 0.50428 |
| XP_021993620.1 | XP_022013182.1 | 1.0693 | 2.1203 | 0.50432 |
| XP_022002420.1 | XP_022021912.1 | 1.1244 | 2.2285 | 0.50455 |
| XP_021984981.2 | XP_022010295.2 | 1.1707 | 2.3189 | 0.50485 |
| XP_021981388.1 | XP_022005608.1 | 1.045  | 2.0692 | 0.50503 |
| XP_022002415.1 | XP_022009213.1 | 0.9888 | 1.9574 | 0.50516 |
| XP_021976022.1 | XP_022010101.1 | 1.3025 | 2.5755 | 0.50573 |
| XP_021989734.1 | XP_021993052.1 | 1.159  | 2.2905 | 0.506   |
| XP_021981626.1 | XP_022021914.1 | 1.4108 | 2.7881 | 0.50601 |
| XP_022029738.1 | XP_022039074.2 | 0.6698 | 1.3234 | 0.50612 |
| XP_021969020.1 | XP_022004455.1 | 1.0383 | 2.0508 | 0.50629 |
| XP_021988229.1 | XP_022005608.1 | 1.0248 | 2.0233 | 0.5065  |
| XP_021992525.1 | XP_022010292.1 | 1.2779 | 2.5215 | 0.5068  |
| XP_022002417.1 | XP_022010294.1 | 0.5481 | 1.08   | 0.5075  |
| XP_021972810.1 | XP_022006926.1 | 1.0246 | 2.0189 | 0.5075  |
| XP_021995116.1 | XP_022013560.1 | 1.2234 | 2.4101 | 0.50761 |
| XP_021988229.1 | XP_022013558.1 | 0.8465 | 1.6667 | 0.50789 |
| XP_021985239.1 | XP_022010101.1 | 1.1509 | 2.2648 | 0.50817 |

|                               |        |        |         |
|-------------------------------|--------|--------|---------|
| XP_021978807.1 XP_035835830.1 | 0.8655 | 1.7025 | 0.50837 |
| XP_021989736.1 XP_022010292.1 | 1.0343 | 2.0342 | 0.50846 |
| XP_022009213.1 XP_022039085.1 | 1.2236 | 2.4041 | 0.50896 |
| XP_021988229.1 XP_022009213.1 | 1.255  | 2.4648 | 0.50917 |
| XP_022010292.1 XP_022039074.2 | 0.6989 | 1.3721 | 0.50937 |
| XP_021968895.1 XP_022010296.1 | 0.816  | 1.6016 | 0.50949 |
| XP_021987457.1 XP_022039074.2 | 1.1874 | 2.3302 | 0.50957 |
| XP_021995117.1 XP_022000224.2 | 1.1688 | 2.2927 | 0.50979 |
| XP_022013183.1 XP_022014870.1 | 1.0685 | 2.0957 | 0.50985 |
| XP_021981388.1 XP_022029739.1 | 1.093  | 2.1424 | 0.51018 |
| XP_021993221.1 XP_022004455.1 | 1.0229 | 2.0045 | 0.5103  |
| XP_022002417.1 XP_022022487.2 | 0.9062 | 1.7757 | 0.51033 |
| XP_022004455.1 XP_022008276.2 | 1.0502 | 2.0572 | 0.5105  |
| XP_022034230.1 XP_022037775.1 | 1.2574 | 2.4612 | 0.51089 |
| XP_022005608.1 XP_022029738.1 | 0.9174 | 1.7947 | 0.51117 |
| XP_021981407.1 XP_022010292.1 | 1.019  | 1.9929 | 0.51132 |
| XP_022006927.1 XP_022010295.2 | 0.9167 | 1.79   | 0.51212 |
| XP_021968895.1 XP_021989734.1 | 1.2226 | 2.3868 | 0.51223 |
| XP_022002417.1 XP_022010292.1 | 0.5092 | 0.9937 | 0.51243 |
| XP_021987458.1 XP_022026964.1 | 1.2143 | 2.3694 | 0.51249 |
| XP_022008276.2 XP_022021914.1 | 1.306  | 2.5465 | 0.51286 |
| XP_022022487.2 XP_022035552.1 | 1.2703 | 2.475  | 0.51325 |
| XP_021981626.1 XP_021988229.1 | 1.5229 | 2.9663 | 0.5134  |
| XP_021981395.1 XP_022021912.1 | 1.1753 | 2.2892 | 0.51341 |
| XP_021984981.2 XP_021995117.1 | 1.1492 | 2.2377 | 0.51356 |
| XP_021989733.1 XP_035833070.1 | 1.2476 | 2.429  | 0.51363 |
| XP_021989734.1 XP_022004980.1 | 0.9379 | 1.824  | 0.5142  |
| XP_022010101.1 XP_022010292.1 | 0.881  | 1.7132 | 0.51424 |
| XP_022010101.1 XP_022013183.1 | 1.3728 | 2.669  | 0.51435 |
| XP_022002420.1 XP_022006926.1 | 0.8915 | 1.7332 | 0.51437 |
| XP_021993620.1 XP_021993622.1 | 1.2625 | 2.4531 | 0.51465 |
| XP_021973011.1 XP_022022487.2 | 1.4286 | 2.775  | 0.51481 |
| XP_021978807.1 XP_021981388.1 | 1.0589 | 2.0561 | 0.515   |
| XP_021978842.1 XP_021989734.1 | 0.8833 | 1.7146 | 0.51516 |
| XP_021993221.1 XP_022002416.1 | 0.9415 | 1.8275 | 0.51518 |
| XP_022002415.1 XP_022035551.1 | 0.9697 | 1.8822 | 0.51519 |
| XP_022002415.1 XP_022035552.1 | 0.9697 | 1.8822 | 0.51519 |
| XP_022008276.2 XP_022021911.1 | 1.3312 | 2.5792 | 0.51613 |
| XP_021981407.1 XP_022013239.1 | 1.3724 | 2.6585 | 0.51623 |
| XP_021993222.1 XP_022006327.1 | 1.5406 | 2.9812 | 0.51677 |
| XP_021993222.1 XP_022002420.1 | 1.0544 | 2.0403 | 0.51679 |
| XP_021987458.1 XP_022009213.1 | 1.0051 | 1.9448 | 0.51681 |
| XP_021989736.1 XP_022013560.1 | 0.8777 | 1.6981 | 0.51687 |
| XP_022002419.1 XP_022006926.1 | 0.8521 | 1.6479 | 0.51708 |
| XP_022013560.1 XP_022029739.1 | 0.6647 | 1.2849 | 0.51732 |
| XP_021989737.1 XP_022002417.1 | 0.9765 | 1.8876 | 0.51732 |
| XP_021969020.1 XP_021985239.1 | 1.5735 | 3.0394 | 0.5177  |
| XP_021973011.1 XP_021995117.1 | 1.1824 | 2.2834 | 0.51782 |
| XP_021985239.1 XP_021989735.1 | 1.1406 | 2.2021 | 0.51796 |
| XP_022010616.1 XP_022022487.2 | 1.0795 | 2.0817 | 0.51857 |
| XP_021973854.1 XP_021995117.1 | 1.4101 | 2.7191 | 0.51859 |
| XP_022026963.1 XP_035835830.1 | 1.2524 | 2.4142 | 0.51876 |
| XP_022000196.1 XP_022001254.1 | 1.2725 | 2.4526 | 0.51884 |
| XP_021984981.2 XP_022026963.1 | 1.254  | 2.4167 | 0.51889 |
| XP_021984981.2 XP_022022487.2 | 1.3006 | 2.5045 | 0.51931 |
| XP_021973854.1 XP_022009213.1 | 1.5381 | 2.9614 | 0.51938 |
| XP_022000224.2 XP_022010296.1 | 0.8297 | 1.5972 | 0.51947 |
| XP_021993621.2 XP_022035551.1 | 1.2868 | 2.4764 | 0.51963 |
| XP_021993621.2 XP_022035552.1 | 1.2868 | 2.4764 | 0.51963 |
| XP_022004979.1 XP_022037775.1 | 1.3269 | 2.5509 | 0.52017 |
| XP_022029739.1 XP_022033162.1 | 0.8126 | 1.5613 | 0.52046 |
| XP_021993551.1 XP_022006327.1 | 1.6479 | 3.1636 | 0.52089 |
| XP_022004980.1 XP_022029738.1 | 1.2224 | 2.3454 | 0.52119 |
| XP_021985239.1 XP_022022835.1 | 1.1321 | 2.1717 | 0.5213  |
| XP_021992525.1 XP_021995117.1 | 1.1064 | 2.1204 | 0.52179 |
| XP_021978842.1 XP_021981626.1 | 1.3361 | 2.5604 | 0.52183 |
| XP_021969020.1 XP_021978842.1 | 1.6754 | 3.2096 | 0.522   |
| XP_022010292.1 XP_022039085.1 | 0.6722 | 1.2874 | 0.52214 |
| XP_022002416.1 XP_022006927.1 | 0.9266 | 1.7737 | 0.52241 |
| XP_022014870.1 XP_022015084.1 | 1.1157 | 2.1352 | 0.52253 |
| XP_021993220.1 XP_022002421.1 | 0.9911 | 1.8967 | 0.52254 |
| XP_021988953.1 XP_035835830.1 | 1.2375 | 2.3678 | 0.52264 |
| XP_021989735.1 XP_021993551.1 | 1.3175 | 2.5191 | 0.523   |
| XP_021988953.1 XP_021989733.1 | 0.9921 | 1.8963 | 0.52318 |
| XP_021989735.1 XP_022010294.1 | 0.9536 | 1.8227 | 0.52318 |
| XP_021993221.1 XP_022035552.1 | 1.4253 | 2.7235 | 0.52333 |
| XP_021986500.1 XP_022006927.1 | 1.003  | 1.9162 | 0.52343 |
| XP_022000224.2 XP_022002421.1 | 0.8826 | 1.6861 | 0.52346 |
| XP_021989736.1 XP_035833070.1 | 1.3375 | 2.555  | 0.52348 |
| XP_022000196.1 XP_022010919.1 | 1.3634 | 2.6044 | 0.5235  |
| XP_021972810.1 XP_022033162.1 | 0.7017 | 1.3403 | 0.52354 |
| XP_022029622.1 XP_022039074.2 | 1.2813 | 2.4458 | 0.52388 |
| XP_022008276.2 XP_022010296.1 | 1.0518 | 2.0061 | 0.5243  |
| XP_022010294.1 XP_022021911.1 | 1.1553 | 2.2029 | 0.52445 |
| XP_022010294.1 XP_022021913.1 | 1.1553 | 2.2029 | 0.52445 |
| XP_022010294.1 XP_022021914.1 | 1.1553 | 2.2029 | 0.52445 |
| XP_021989737.1 XP_022035552.1 | 0.8223 | 1.5668 | 0.52483 |
| XP_035835830.1 XP_035838717.1 | 0.8931 | 1.7004 | 0.52523 |

|                               |        |        |         |
|-------------------------------|--------|--------|---------|
| XP_021993221.1 XP_022002415.1 | 0.936  | 1.782  | 0.52525 |
| XP_022013182.1 XP_022014870.1 | 1.053  | 2.0042 | 0.5254  |
| XP_021981407.1 XP_022029740.1 | 1.1011 | 2.0955 | 0.52546 |
| XP_021995116.1 XP_022010295.2 | 1.0422 | 1.9834 | 0.52546 |
| XP_022010294.1 XP_022029739.1 | 0.6885 | 1.31   | 0.52557 |
| XP_022001254.1 XP_022002420.1 | 0.9291 | 1.7664 | 0.52599 |
| XP_022004979.1 XP_022039085.1 | 1.0589 | 2.0126 | 0.52614 |
| XP_021973855.1 XP_022022487.2 | 1.6152 | 3.069  | 0.5263  |
| XP_022002419.1 XP_022002420.1 | 0.1377 | 0.2616 | 0.52638 |
| XP_021978842.1 XP_022010296.1 | 0.983  | 1.8672 | 0.52646 |
| XP_022006926.1 XP_035842399.1 | 1.3703 | 2.6011 | 0.52682 |
| XP_022006668.1 XP_022013560.1 | 0.9319 | 1.7685 | 0.52694 |
| XP_021981388.1 XP_021993620.1 | 1.0236 | 1.9425 | 0.52695 |
| XP_022006926.1 XP_022008275.1 | 1.1181 | 2.1218 | 0.52696 |
| XP_022010294.1 XP_022029740.1 | 0.6149 | 1.166  | 0.52736 |
| XP_021993222.1 XP_022002415.1 | 1.0041 | 1.9028 | 0.5277  |
| XP_021993620.1 XP_022004455.1 | 0.9469 | 1.794  | 0.52781 |
| XP_021973854.1 XP_021988953.1 | 1.7248 | 3.2665 | 0.52803 |
| XP_022002421.1 XP_022022835.1 | 1.2712 | 2.4057 | 0.52841 |
| XP_022004980.1 XP_022034230.1 | 1.1451 | 2.1663 | 0.5286  |
| XP_021978842.1 XP_021995117.1 | 1.1046 | 2.0888 | 0.52882 |
| XP_022002416.1 XP_022010292.1 | 0.5067 | 0.9579 | 0.52897 |
| XP_021972810.1 XP_022013558.1 | 0.6349 | 1.2002 | 0.529   |
| XP_022004455.1 XP_022021911.1 | 0.9388 | 1.7745 | 0.52905 |
| XP_022004455.1 XP_022021913.1 | 0.9388 | 1.7745 | 0.52905 |
| XP_022004455.1 XP_022021914.1 | 0.9388 | 1.7745 | 0.52905 |
| XP_022022835.1 XP_022034230.1 | 1.2031 | 2.2734 | 0.52921 |
| XP_021969020.1 XP_022001254.1 | 1.2681 | 2.395  | 0.52948 |
| XP_022010101.1 XP_022013558.1 | 0.8806 | 1.6626 | 0.52965 |
| XP_021968895.1 XP_022029740.1 | 0.7809 | 1.4743 | 0.52968 |
| XP_022002419.1 XP_022010294.1 | 0.6243 | 1.1782 | 0.52988 |
| XP_021969020.1 XP_022002418.1 | 0.961  | 1.8131 | 0.53003 |
| XP_021987457.1 XP_022029740.1 | 1.14   | 2.1505 | 0.53011 |
| XP_022035384.1 XP_035835830.1 | 1.5986 | 3.0155 | 0.53013 |
| XP_022002420.1 XP_022018622.1 | 0.9323 | 1.758  | 0.53032 |
| XP_021993621.2 XP_035842399.1 | 1.4208 | 2.6777 | 0.5306  |
| XP_022008275.1 XP_022022835.1 | 1.1283 | 2.1249 | 0.53099 |
| XP_022034230.1 XP_022039085.1 | 1.154  | 2.1732 | 0.53101 |
| XP_021993622.1 XP_022039074.2 | 1.37   | 2.5792 | 0.53117 |
| XP_021993622.1 XP_022013183.1 | 1.4626 | 2.7533 | 0.53122 |
| XP_022001254.1 XP_022039085.1 | 1.1499 | 2.1639 | 0.5314  |
| XP_021973855.1 XP_021981407.1 | 1.645  | 3.0949 | 0.53152 |
| XP_021993622.1 XP_022010101.1 | 1.8554 | 3.4905 | 0.53156 |
| XP_021987457.1 XP_022002421.1 | 1.1763 | 2.2102 | 0.53221 |
| XP_021986500.1 XP_022002419.1 | 0.8839 | 1.66   | 0.53247 |
| XP_021973854.1 XP_021976022.1 | 1.5389 | 2.8901 | 0.53247 |
| XP_021984766.1 XP_022010616.1 | 1.3683 | 2.5694 | 0.53254 |
| XP_021987458.1 XP_022029740.1 | 1.156  | 2.1707 | 0.53255 |
| XP_021995117.1 XP_022029740.1 | 0.9891 | 1.8567 | 0.53272 |
| XP_022006327.1 XP_022008276.2 | 1.3298 | 2.496  | 0.53277 |
| XP_022002419.1 XP_022021911.1 | 1.0314 | 1.9355 | 0.53289 |
| XP_022002419.1 XP_022021913.1 | 1.0314 | 1.9355 | 0.53289 |
| XP_022002419.1 XP_022021914.1 | 1.0314 | 1.9355 | 0.53289 |
| XP_021999258.1 XP_022013239.1 | 1.8351 | 3.4422 | 0.53312 |
| XP_022010919.1 XP_022026964.1 | 1.2805 | 2.4004 | 0.53345 |
| XP_022026963.1 XP_022029739.1 | 1.2036 | 2.2557 | 0.53358 |
| XP_022002420.1 XP_022006327.1 | 1.1747 | 2.2006 | 0.53381 |
| XP_021984766.1 XP_021993620.1 | 1.0409 | 1.9499 | 0.53382 |
| XP_022004455.1 XP_035835830.1 | 0.5148 | 0.9638 | 0.53414 |
| XP_021978842.1 XP_021988229.1 | 1.0923 | 2.0449 | 0.53416 |
| XP_021987458.1 XP_022002421.1 | 1.1922 | 2.2306 | 0.53448 |
| XP_021989733.1 XP_022002416.1 | 0.9608 | 1.7974 | 0.53455 |
| XP_021988229.1 XP_022013182.1 | 1.2989 | 2.4284 | 0.53488 |
| XP_022006926.1 XP_022029739.1 | 0.981  | 1.8338 | 0.53495 |
| XP_021973854.1 XP_022010292.1 | 1.07   | 1.9998 | 0.53505 |
| XP_021989735.1 XP_035835830.1 | 1.0004 | 1.8682 | 0.53549 |
| XP_021968895.1 XP_022029738.1 | 0.8463 | 1.5785 | 0.53614 |
| XP_022002418.1 XP_022034230.1 | 0.989  | 1.8432 | 0.53657 |
| XP_021989736.1 XP_022002420.1 | 0.8592 | 1.601  | 0.53666 |
| XP_021976022.1 XP_022002420.1 | 1.0041 | 1.871  | 0.53666 |
| XP_021981388.1 XP_021993621.2 | 0.9808 | 1.8271 | 0.53681 |
| XP_021989736.1 XP_022010296.1 | 1.0185 | 1.8972 | 0.53684 |
| XP_021987458.1 XP_022010919.1 | 1.4386 | 2.6794 | 0.53691 |
| XP_021973855.1 XP_021993220.1 | 2.0705 | 3.8562 | 0.53693 |
| XP_022035551.1 XP_022039074.2 | 1.294  | 2.4087 | 0.53722 |
| XP_022035552.1 XP_022039074.2 | 1.294  | 2.4087 | 0.53722 |
| XP_021993621.2 XP_022002419.1 | 0.9223 | 1.7161 | 0.53744 |
| XP_021973854.1 XP_022029622.1 | 1.7074 | 3.1756 | 0.53766 |
| XP_022004979.1 XP_022021912.1 | 1.2665 | 2.3541 | 0.538   |
| XP_021973011.1 XP_022008276.2 | 1.2735 | 2.3668 | 0.53807 |
| XP_022021911.1 XP_035835830.1 | 1.1504 | 2.137  | 0.53832 |
| XP_022021913.1 XP_035835830.1 | 1.1504 | 2.137  | 0.53832 |
| XP_022021914.1 XP_035835830.1 | 1.1504 | 2.137  | 0.53832 |
| XP_021972810.1 XP_022004455.1 | 0.5559 | 1.0314 | 0.53898 |
| XP_021984766.1 XP_022018622.1 | 1.4017 | 2.5983 | 0.53947 |
| XP_022008276.2 XP_022026963.1 | 1.4825 | 2.7477 | 0.53954 |
| XP_021989733.1 XP_022029738.1 | 1.1583 | 2.1463 | 0.53967 |
| XP_022013239.1 XP_022037775.1 | 1.677  | 3.1074 | 0.53968 |



|                               |        |        |         |
|-------------------------------|--------|--------|---------|
| XP_021989737.1 XP_022035551.1 | 0.8196 | 1.5183 | 0.53981 |
| XP_021973854.1 XP_022034230.1 | 1.4577 | 2.7    | 0.53989 |
| XP_021989733.1 XP_022026963.1 | 1.3213 | 2.4447 | 0.54048 |
| XP_021988229.1 XP_021993222.1 | 1.466  | 2.7115 | 0.54066 |
| XP_021988229.1 XP_022013183.1 | 1.3156 | 2.4331 | 0.54071 |
| XP_022006926.1 XP_022033162.1 | 1.1468 | 2.1203 | 0.54087 |
| XP_021972810.1 XP_022000224.2 | 0.9069 | 1.6752 | 0.54137 |
| XP_021989737.1 XP_022034230.1 | 1.1837 | 2.1862 | 0.54144 |
| XP_021986500.1 XP_022002417.1 | 0.7796 | 1.4397 | 0.5415  |
| XP_022006926.1 XP_022010296.1 | 0.8857 | 1.6352 | 0.54165 |
| XP_021989735.1 XP_022006926.1 | 1.293  | 2.3866 | 0.54177 |
| XP_021987458.1 XP_035838717.1 | 0.9683 | 1.7867 | 0.54195 |
| XP_022010292.1 XP_022014870.1 | 0.8088 | 1.4917 | 0.5422  |
| XP_021981395.1 XP_022026963.1 | 1.5519 | 2.8619 | 0.54226 |
| XP_022000196.1 XP_022026963.1 | 1.2482 | 2.3003 | 0.54262 |
| XP_021972810.1 XP_021993221.1 | 1.3114 | 2.4161 | 0.54278 |
| XP_021987457.1 XP_022021914.1 | 1.2004 | 2.2111 | 0.5429  |
| XP_021985239.1 XP_021987458.1 | 0.9717 | 1.7898 | 0.54291 |
| XP_021989737.1 XP_022013558.1 | 0.9337 | 1.7191 | 0.54313 |
| XP_021978807.1 XP_021987457.1 | 1.0131 | 1.865  | 0.54322 |
| XP_021978807.1 XP_021987458.1 | 1.0131 | 1.865  | 0.54322 |
| XP_021978842.1 XP_022010292.1 | 0.9551 | 1.7581 | 0.54326 |
| XP_022010291.1 XP_022035551.1 | 1.2121 | 2.2299 | 0.54357 |
| XP_022010291.1 XP_022035552.1 | 1.2121 | 2.2299 | 0.54357 |
| XP_022010295.2 XP_022022835.1 | 1.0695 | 1.9673 | 0.54364 |
| XP_021981395.1 XP_022039074.2 | 1.4333 | 2.6353 | 0.54388 |
| XP_022010291.1 XP_022037775.1 | 1.0376 | 1.9074 | 0.54399 |
| XP_021978807.1 XP_021981407.1 | 1.0877 | 1.9989 | 0.54415 |
| XP_021995117.1 XP_022010291.1 | 1.035  | 1.9016 | 0.54428 |
| XP_021969020.1 XP_021992525.1 | 1.2929 | 2.3746 | 0.54447 |
| XP_022002415.1 XP_022006668.1 | 1.0183 | 1.8697 | 0.54463 |
| XP_021988229.1 XP_035838717.1 | 1.26   | 2.3134 | 0.54465 |
| XP_021988953.1 XP_022026963.1 | 1.2537 | 2.2997 | 0.54516 |
| XP_021989734.1 XP_035835830.1 | 1.0591 | 1.9427 | 0.54517 |
| XP_021985239.1 XP_022002421.1 | 0.8112 | 1.4877 | 0.54527 |
| XP_021993621.2 XP_035835830.1 | 1.1804 | 2.1646 | 0.54532 |
| XP_021973316.1 XP_021989733.1 | 1.3202 | 2.4209 | 0.54533 |
| XP_021988953.1 XP_022029622.1 | 1.2822 | 2.3509 | 0.54541 |
| XP_021993283.1 XP_035833070.1 | 1.6914 | 3.1002 | 0.54558 |
| XP_021973011.1 XP_021987458.1 | 1.2856 | 2.3541 | 0.54611 |
| XP_021984981.2 XP_022004455.1 | 0.9801 | 1.794  | 0.54632 |
| XP_021988229.1 XP_035835830.1 | 0.6686 | 1.2236 | 0.54642 |
| XP_022002416.1 XP_022010296.1 | 0.5164 | 0.9434 | 0.54738 |
| XP_021993620.1 XP_022029738.1 | 1.1236 | 2.0525 | 0.54743 |
| XP_022010295.2 XP_035835830.1 | 0.7302 | 1.3328 | 0.54787 |
| XP_021989735.1 XP_022035552.1 | 0.9475 | 1.7293 | 0.54791 |
| XP_021993621.2 XP_022002421.1 | 0.8914 | 1.6268 | 0.54795 |
| XP_022000224.2 XP_022006668.1 | 1.033  | 1.8849 | 0.54804 |
| XP_021968895.1 XP_022002417.1 | 0.7902 | 1.4414 | 0.54822 |
| XP_022029738.1 XP_022035384.1 | 1.3203 | 2.4071 | 0.5485  |
| XP_021985239.1 XP_021987457.1 | 0.9699 | 1.7676 | 0.54871 |
| XP_021973011.1 XP_021989734.1 | 1.1056 | 2.0147 | 0.54877 |
| XP_021981626.1 XP_022014870.1 | 1.0136 | 1.847  | 0.54878 |
| XP_021981407.1 XP_022010101.1 | 1.2892 | 2.3488 | 0.54888 |
| XP_021985239.1 XP_022013239.1 | 1.2429 | 2.2627 | 0.5493  |
| XP_021986500.1 XP_022010919.1 | 1.183  | 2.1531 | 0.54944 |
| XP_022010101.1 XP_022029739.1 | 1.018  | 1.8526 | 0.5495  |
| XP_022034230.1 XP_035838717.1 | 1.1218 | 2.0413 | 0.54955 |
| XP_021989734.1 XP_022014870.1 | 0.9584 | 1.7439 | 0.54957 |
| XP_021972810.1 XP_021981407.1 | 1.0417 | 1.8953 | 0.54962 |
| XP_022002420.1 XP_022021911.1 | 1.1279 | 2.052  | 0.54966 |
| XP_022002420.1 XP_022021913.1 | 1.1279 | 2.052  | 0.54966 |
| XP_022002420.1 XP_022021914.1 | 1.1279 | 2.052  | 0.54966 |
| XP_021986500.1 XP_022002418.1 | 0.7794 | 1.4176 | 0.5498  |
| XP_022008275.1 XP_022010101.1 | 1.2915 | 2.349  | 0.54981 |
| XP_021968895.1 XP_021989736.1 | 1.1583 | 2.1048 | 0.55031 |
| XP_021968895.1 XP_022002421.1 | 0.7363 | 1.3376 | 0.55046 |
| XP_021993222.1 XP_022002417.1 | 1.0596 | 1.9237 | 0.55081 |
| XP_021993621.2 XP_022013183.1 | 1.239  | 2.249  | 0.55091 |
| XP_021981626.1 XP_022004455.1 | 0.9363 | 1.6992 | 0.55102 |
| XP_021984981.2 XP_022010919.1 | 1.0075 | 1.8279 | 0.55118 |
| XP_022006926.1 XP_022026964.1 | 1.3391 | 2.429  | 0.5513  |
| XP_022026963.1 XP_022029738.1 | 1.0498 | 1.903  | 0.55166 |
| XP_022002420.1 XP_022013182.1 | 1.1458 | 2.077  | 0.55166 |
| XP_021981395.1 XP_022006927.1 | 1.4122 | 2.5598 | 0.55168 |
| XP_022000224.2 XP_022022487.2 | 1.0403 | 1.8854 | 0.55177 |
| XP_021985239.1 XP_022029738.1 | 0.8776 | 1.5902 | 0.55188 |
| XP_021978842.1 XP_022000224.2 | 1.2989 | 2.3532 | 0.55197 |
| XP_021984766.1 XP_022006668.1 | 1.436  | 2.5999 | 0.55233 |
| XP_021973854.1 XP_021988229.1 | 1.5573 | 2.8194 | 0.55235 |
| XP_022002416.1 XP_022005608.1 | 0.8524 | 1.5432 | 0.55236 |
| XP_021989734.1 XP_022026963.1 | 1.3481 | 2.4391 | 0.5527  |
| XP_022013183.1 XP_035835830.1 | 1.2574 | 2.2748 | 0.55275 |
| XP_022010291.1 XP_022029622.1 | 1.0508 | 1.9003 | 0.55297 |
| XP_022004455.1 XP_022034230.1 | 0.9791 | 1.7702 | 0.5531  |
| XP_021969020.1 XP_022002419.1 | 1.0734 | 1.94   | 0.5533  |
| XP_022002417.1 XP_022006926.1 | 0.8842 | 1.5976 | 0.55346 |
| XP_021993220.1 XP_022006926.1 | 1.1718 | 2.1141 | 0.55428 |

|                               |        |        |         |
|-------------------------------|--------|--------|---------|
| XP_021986500.1 XP_022002415.1 | 0.7983 | 1.4397 | 0.55449 |
| XP_021989735.1 XP_022010101.1 | 1.1023 | 1.9861 | 0.55501 |
| XP_021985239.1 XP_022006327.1 | 1.4861 | 2.6771 | 0.55512 |
| XP_022005608.1 XP_022021911.1 | 1.2549 | 2.2605 | 0.55514 |
| XP_022005608.1 XP_022021913.1 | 1.2549 | 2.2605 | 0.55514 |
| XP_022005608.1 XP_022021914.1 | 1.2549 | 2.2605 | 0.55514 |
| XP_021987457.1 XP_022021911.1 | 1.1651 | 2.0982 | 0.55529 |
| XP_022002418.1 XP_022006927.1 | 0.9152 | 1.6479 | 0.55537 |
| XP_022010294.1 XP_022029738.1 | 0.6874 | 1.2376 | 0.55543 |
| XP_022029740.1 XP_022034230.1 | 0.9879 | 1.777  | 0.55594 |
| XP_022002418.1 XP_022004980.1 | 1.2359 | 2.2225 | 0.55609 |
| XP_021981407.1 XP_022010296.1 | 1.1382 | 2.0467 | 0.55611 |
| XP_021973011.1 XP_021985239.1 | 1.1159 | 2.0066 | 0.55611 |
| XP_021987457.1 XP_035835830.1 | 0.973  | 1.7496 | 0.55613 |
| XP_021987458.1 XP_035835830.1 | 0.973  | 1.7496 | 0.55613 |
| XP_021989736.1 XP_022010294.1 | 0.9132 | 1.6418 | 0.55622 |
| XP_021993221.1 XP_022002420.1 | 0.9916 | 1.7827 | 0.55623 |
| XP_022010296.1 XP_022035384.1 | 0.9609 | 1.7275 | 0.55624 |
| XP_022033162.1 XP_035833070.1 | 1.2353 | 2.2206 | 0.55629 |
| XP_022002421.1 XP_022010294.1 | 0.6313 | 1.1348 | 0.55631 |
| XP_021973316.1 XP_035838717.1 | 1.2511 | 2.2485 | 0.55642 |
| XP_021993220.1 XP_022013558.1 | 0.9475 | 1.7028 | 0.55644 |
| XP_021993052.1 XP_022021912.1 | 1.0921 | 1.962  | 0.55663 |
| XP_021981626.1 XP_022010919.1 | 1.4635 | 2.6278 | 0.55693 |
| XP_021981407.1 XP_021984766.1 | 0.8871 | 1.5928 | 0.55694 |
| XP_021992525.1 XP_022010919.1 | 1.0782 | 1.9352 | 0.55715 |
| XP_022010295.2 XP_035842399.1 | 1.0054 | 1.8039 | 0.55735 |
| XP_022009213.1 XP_022034230.1 | 1.1615 | 2.0839 | 0.55737 |
| XP_021973011.1 XP_022004455.1 | 1.0011 | 1.7959 | 0.55744 |
| XP_021995117.1 XP_022013182.1 | 1.1707 | 2.0993 | 0.55766 |
| XP_021989736.1 XP_022014870.1 | 0.9021 | 1.617  | 0.55788 |
| XP_021973316.1 XP_021993621.2 | 1.5446 | 2.7684 | 0.55794 |
| XP_021985239.1 XP_022002415.1 | 0.7878 | 1.4112 | 0.55825 |
| XP_021999258.1 XP_022002420.1 | 1.0145 | 1.8165 | 0.55849 |
| XP_021973316.1 XP_021993620.1 | 1.2064 | 2.1599 | 0.55854 |
| XP_021999258.1 XP_022002416.1 | 1.0995 | 1.9685 | 0.55855 |
| XP_021987457.1 XP_022033162.1 | 1.1589 | 2.0746 | 0.55861 |
| XP_022002417.1 XP_022005608.1 | 0.8492 | 1.5199 | 0.55872 |
| XP_021981626.1 XP_021989734.1 | 1.1585 | 2.0715 | 0.55926 |
| XP_021993621.2 XP_022039085.1 | 1.1254 | 2.0108 | 0.55968 |
| XP_022008276.2 XP_022029740.1 | 1.1005 | 1.9662 | 0.55971 |
| XP_021993221.1 XP_022035551.1 | 1.4226 | 2.5406 | 0.55995 |
| XP_022000196.1 XP_022034230.1 | 1.4182 | 2.5326 | 0.55998 |
| XP_021989737.1 XP_022002416.1 | 0.913  | 1.6302 | 0.56005 |
| XP_021993221.1 XP_022002418.1 | 0.9393 | 1.6768 | 0.56017 |
| XP_022002420.1 XP_022022835.1 | 0.9842 | 1.7569 | 0.56019 |
| XP_022006668.1 XP_035842399.1 | 1.2859 | 2.2954 | 0.56021 |
| XP_021969020.1 XP_022008276.2 | 1.6198 | 2.8911 | 0.56027 |
| XP_022021911.1 XP_022026964.1 | 1.4328 | 2.5561 | 0.56054 |
| XP_022021913.1 XP_022026964.1 | 1.4328 | 2.5561 | 0.56054 |
| XP_022021914.1 XP_022026964.1 | 1.4328 | 2.5561 | 0.56054 |
| XP_021973011.1 XP_021981395.1 | 0.9281 | 1.6556 | 0.56058 |
| XP_022008275.1 XP_022022487.2 | 1.5125 | 2.698  | 0.5606  |
| XP_022002419.1 XP_035833070.1 | 1.1154 | 1.9888 | 0.56084 |
| XP_022000224.2 XP_022022835.1 | 1.1176 | 1.992  | 0.56104 |
| XP_022002421.1 XP_022010292.1 | 0.5767 | 1.0272 | 0.56143 |
| XP_022014870.1 XP_022035384.1 | 1.0582 | 1.8845 | 0.56153 |
| XP_021973011.1 XP_021993622.1 | 1.252  | 2.2287 | 0.56176 |
| XP_021973011.1 XP_022039085.1 | 1.1728 | 2.0873 | 0.56187 |
| XP_022002418.1 XP_022010294.1 | 0.5844 | 1.0397 | 0.56209 |
| XP_021981395.1 XP_022034230.1 | 1.244  | 2.2115 | 0.56251 |
| XP_022008276.2 XP_022021913.1 | 1.3477 | 2.3956 | 0.56257 |
| XP_022004980.1 XP_022008275.1 | 0.8751 | 1.5551 | 0.56273 |
| XP_022010919.1 XP_022022835.1 | 1.1647 | 2.0696 | 0.56277 |
| XP_022002417.1 XP_022013558.1 | 0.4812 | 0.8549 | 0.56287 |
| XP_021973316.1 XP_022018622.1 | 1.3966 | 2.4809 | 0.56294 |
| XP_022002421.1 XP_022033162.1 | 0.7124 | 1.2654 | 0.56298 |
| XP_021989735.1 XP_022035551.1 | 0.9487 | 1.685  | 0.56303 |
| XP_021969020.1 XP_022010292.1 | 1.2763 | 2.2667 | 0.56307 |
| XP_022002415.1 XP_022010294.1 | 0.5627 | 0.9992 | 0.56315 |
| XP_022013183.1 XP_022033162.1 | 1.2621 | 2.2411 | 0.56316 |
| XP_022006668.1 XP_035833070.1 | 1.4029 | 2.491  | 0.56319 |
| XP_022022487.2 XP_022033162.1 | 1.1618 | 2.0628 | 0.56322 |
| XP_022001254.1 XP_022010296.1 | 1.1322 | 2.01   | 0.56328 |
| XP_021972810.1 XP_022010295.2 | 0.7199 | 1.278  | 0.5633  |
| XP_021989733.1 XP_022002420.1 | 0.9396 | 1.6669 | 0.56368 |
| XP_021968895.1 XP_022010295.2 | 0.8247 | 1.4627 | 0.56382 |
| XP_021989734.1 XP_022005608.1 | 0.9246 | 1.6397 | 0.56388 |
| XP_022002421.1 XP_022037775.1 | 1.094  | 1.9395 | 0.56406 |
| XP_022002421.1 XP_022009213.1 | 1.0506 | 1.8623 | 0.56414 |
| XP_021985239.1 XP_022002418.1 | 0.7876 | 1.3956 | 0.56435 |
| XP_021993052.1 XP_021993221.1 | 1.1444 | 2.0278 | 0.56436 |
| XP_021968895.1 XP_021993220.1 | 1.3733 | 2.4333 | 0.56438 |
| XP_021973011.1 XP_022002417.1 | 0.9579 | 1.697  | 0.56447 |
| XP_021995116.1 XP_022002419.1 | 1.1424 | 2.0236 | 0.56454 |
| XP_021978842.1 XP_022010295.2 | 0.9507 | 1.6836 | 0.56468 |
| XP_021995117.1 XP_022039085.1 | 1.0544 | 1.867  | 0.56476 |
| XP_021993620.1 XP_022006668.1 | 1.4201 | 2.5136 | 0.56497 |

|                               |        |        |         |
|-------------------------------|--------|--------|---------|
| XP_021969020.1 XP_021988953.1 | 1.332  | 2.3575 | 0.56501 |
| XP_021988229.1 XP_021989737.1 | 1.1391 | 2.0153 | 0.56523 |
| XP_022004979.1 XP_022022835.1 | 1.2351 | 2.1849 | 0.56529 |
| XP_021984766.1 XP_021989736.1 | 0.9496 | 1.679  | 0.56557 |
| XP_022004979.1 XP_022015084.1 | 1.1559 | 2.0434 | 0.56567 |
| XP_021989737.1 XP_022008276.2 | 1.4231 | 2.5152 | 0.5658  |
| XP_021985239.1 XP_022035551.1 | 1.0482 | 1.8513 | 0.5662  |
| XP_021985239.1 XP_022035552.1 | 1.0482 | 1.8513 | 0.5662  |
| XP_021993620.1 XP_022015084.1 | 1.1314 | 1.9982 | 0.56621 |
| XP_021981407.1 XP_022000196.1 | 1.141  | 2.0143 | 0.56645 |
| XP_021968895.1 XP_022002416.1 | 0.7791 | 1.3751 | 0.56658 |
| XP_021989735.1 XP_022034230.1 | 1.1465 | 2.0232 | 0.56668 |
| XP_022015084.1 XP_022026963.1 | 1.1291 | 1.9918 | 0.56687 |
| XP_022002417.1 XP_022010296.1 | 0.538  | 0.9487 | 0.56709 |
| XP_022001254.1 XP_022029738.1 | 1.1396 | 2.0093 | 0.56716 |
| XP_021993052.1 XP_022010101.1 | 0.8943 | 1.5761 | 0.56741 |
| XP_022004979.1 XP_022033162.1 | 1.2906 | 2.2744 | 0.56745 |
| XP_022013239.1 XP_022029739.1 | 1.322  | 2.3278 | 0.56792 |
| XP_021972810.1 XP_021988953.1 | 1.2446 | 2.1913 | 0.56797 |
| XP_021989735.1 XP_021993052.1 | 1.0854 | 1.91   | 0.56827 |
| XP_022010616.1 XP_022014870.1 | 0.8843 | 1.5559 | 0.56835 |
| XP_021978807.1 XP_021985239.1 | 0.8221 | 1.4463 | 0.56842 |
| XP_022002416.1 XP_022004980.1 | 1.191  | 2.0945 | 0.56863 |
| XP_022002417.1 XP_022021913.1 | 1.1176 | 1.9651 | 0.56872 |
| XP_022002417.1 XP_022021914.1 | 1.1176 | 1.9651 | 0.56872 |
| XP_021993622.1 XP_022029738.1 | 1.3804 | 2.4271 | 0.56874 |
| XP_021973011.1 XP_022002415.1 | 0.9261 | 1.6274 | 0.56907 |
| XP_022000224.2 XP_022010919.1 | 0.9725 | 1.708  | 0.56938 |
| XP_021993283.1 XP_022022835.1 | 1.5482 | 2.7191 | 0.56938 |
| XP_021987458.1 XP_022001254.1 | 1.2349 | 2.1667 | 0.56995 |
| XP_021992525.1 XP_021993620.1 | 1.1386 | 1.9977 | 0.56996 |
| XP_021972810.1 XP_022010292.1 | 0.6538 | 1.1468 | 0.57011 |
| XP_021978842.1 XP_022037775.1 | 1.2197 | 2.1389 | 0.57025 |
| XP_021993221.1 XP_021993622.1 | 1.369  | 2.3999 | 0.57044 |
| XP_022013558.1 XP_022029740.1 | 0.611  | 1.0711 | 0.57044 |
| XP_021972810.1 XP_021987457.1 | 1.1866 | 2.08   | 0.57048 |
| XP_021989733.1 XP_022002418.1 | 1.0048 | 1.7605 | 0.57075 |
| XP_022006927.1 XP_022010296.1 | 1.0404 | 1.8218 | 0.57108 |
| XP_022013183.1 XP_022034230.1 | 1.1185 | 1.9584 | 0.57113 |
| XP_021987457.1 XP_022010919.1 | 1.4279 | 2.5001 | 0.57114 |
| XP_021978842.1 XP_022013239.1 | 1.4252 | 2.4953 | 0.57115 |
| XP_022021912.1 XP_035835830.1 | 1.1224 | 1.9651 | 0.57117 |
| XP_021993620.1 XP_022029740.1 | 0.8828 | 1.5446 | 0.57154 |
| XP_021993222.1 XP_022002416.1 | 1.0233 | 1.7902 | 0.57161 |
| XP_021993620.1 XP_022010291.1 | 1.1385 | 1.9912 | 0.57177 |
| XP_021981626.1 XP_022010294.1 | 1.1087 | 1.9379 | 0.57211 |
| XP_021973854.1 XP_022010295.2 | 1.1902 | 2.08   | 0.57221 |
| XP_022002415.1 XP_022035384.1 | 1.2751 | 2.2278 | 0.57236 |
| XP_022004455.1 XP_022010291.1 | 0.5426 | 0.9474 | 0.57273 |
| XP_021995116.1 XP_022010294.1 | 1.2123 | 2.1167 | 0.57273 |
| XP_021984766.1 XP_022000224.2 | 1.1793 | 2.0578 | 0.57309 |
| XP_022002420.1 XP_022035384.1 | 1.3184 | 2.3003 | 0.57314 |
| XP_021973011.1 XP_022006668.1 | 1.2485 | 2.1773 | 0.57342 |
| XP_021993221.1 XP_022029740.1 | 1.1389 | 1.9861 | 0.57344 |
| XP_021978842.1 XP_022039085.1 | 1.3065 | 2.2776 | 0.57363 |
| XP_021988229.1 XP_021993620.1 | 1.0606 | 1.8486 | 0.57373 |
| XP_022009213.1 XP_022015084.1 | 1.1572 | 2.0166 | 0.57384 |
| XP_021984981.2 XP_022010291.1 | 1.3145 | 2.29   | 0.57402 |
| XP_021989733.1 XP_022026964.1 | 1.1481 | 1.9996 | 0.57416 |
| XP_022002419.1 XP_035835830.1 | 0.4153 | 0.7231 | 0.57433 |
| XP_022006668.1 XP_022029739.1 | 1.051  | 1.8298 | 0.57438 |
| XP_021988229.1 XP_022022487.2 | 1.0552 | 1.8364 | 0.5746  |
| XP_021984766.1 XP_022002421.1 | 1.1375 | 1.9788 | 0.57484 |
| XP_022013239.1 XP_035835830.1 | 1.1141 | 1.9377 | 0.57496 |
| XP_021984766.1 XP_035835830.1 | 1.1622 | 2.0213 | 0.57498 |
| XP_022004455.1 XP_022035551.1 | 0.9562 | 1.6626 | 0.57512 |
| XP_022004455.1 XP_022035552.1 | 0.9562 | 1.6626 | 0.57512 |
| XP_021988229.1 XP_021992525.1 | 1.2421 | 2.1597 | 0.57513 |
| XP_021973854.1 XP_022018622.1 | 1.3203 | 2.2954 | 0.57519 |
| XP_022002420.1 XP_022039085.1 | 0.6115 | 1.063  | 0.57526 |
| XP_021972810.1 XP_022013560.1 | 0.7977 | 1.3864 | 0.57538 |
| XP_022006926.1 XP_022026963.1 | 1.1362 | 1.9736 | 0.5757  |
| XP_021999258.1 XP_022015084.1 | 1.4174 | 2.462  | 0.57571 |
| XP_021984766.1 XP_021993220.1 | 1.4247 | 2.4743 | 0.5758  |
| XP_021988953.1 XP_022002420.1 | 0.9905 | 1.7195 | 0.57604 |
| XP_022010295.2 XP_022039085.1 | 0.7575 | 1.3142 | 0.5764  |
| XP_021993620.1 XP_022022835.1 | 1.1923 | 2.068  | 0.57655 |
| XP_021989737.1 XP_022002415.1 | 0.9155 | 1.5878 | 0.57658 |
| XP_022002421.1 XP_022006668.1 | 1.1371 | 1.9714 | 0.5768  |
| XP_022004455.1 XP_022026964.1 | 0.9455 | 1.6391 | 0.57684 |
| XP_022010296.1 XP_022029740.1 | 0.7011 | 1.2153 | 0.57689 |
| XP_021981626.1 XP_022010292.1 | 0.9983 | 1.7284 | 0.57759 |
| XP_022013560.1 XP_022014870.1 | 1.0638 | 1.8417 | 0.57762 |
| XP_022013239.1 XP_022013560.1 | 1.0024 | 1.7353 | 0.57765 |
| XP_021972810.1 XP_021973316.1 | 1.4664 | 2.5383 | 0.57771 |
| XP_022000224.2 XP_022004455.1 | 0.8745 | 1.5136 | 0.57776 |
| XP_021993621.2 XP_035838717.1 | 1.0962 | 1.8972 | 0.5778  |
| XP_021993220.1 XP_022010292.1 | 0.9661 | 1.6712 | 0.57809 |

|                               |        |        |         |
|-------------------------------|--------|--------|---------|
| XP_021987457.1 XP_022026964.1 | 1.2277 | 2.1222 | 0.5785  |
| XP_021988953.1 XP_022006668.1 | 1.3106 | 2.2651 | 0.57861 |
| XP_022001254.1 XP_022010291.1 | 1.1676 | 2.0179 | 0.57862 |
| XP_021968895.1 XP_021988953.1 | 1.2049 | 2.0819 | 0.57875 |
| XP_022013560.1 XP_022022487.2 | 0.9845 | 1.7007 | 0.57888 |
| XP_022014870.1 XP_022021913.1 | 1.1943 | 2.0613 | 0.57939 |
| XP_022014870.1 XP_022021914.1 | 1.1943 | 2.0613 | 0.57939 |
| XP_022002418.1 XP_022035384.1 | 1.3686 | 2.3601 | 0.57989 |
| XP_022004455.1 XP_035838717.1 | 0.9262 | 1.5966 | 0.58011 |
| XP_022013239.1 XP_022029740.1 | 1.005  | 1.7312 | 0.58052 |
| XP_021978842.1 XP_022013558.1 | 0.9483 | 1.6328 | 0.58078 |
| XP_021993620.1 XP_022010295.2 | 0.9838 | 1.6937 | 0.58086 |
| XP_021993052.1 XP_022008276.2 | 1.1399 | 1.962  | 0.58099 |
| XP_022029738.1 XP_022039085.1 | 0.7497 | 1.2903 | 0.58103 |
| XP_021973011.1 XP_022013182.1 | 1.1605 | 1.9969 | 0.58115 |
| XP_021973011.1 XP_022013183.1 | 1.1605 | 1.9969 | 0.58115 |
| XP_021987458.1 XP_022004980.1 | 1.3612 | 2.3422 | 0.58116 |
| XP_021969020.1 XP_021976022.1 | 1.4652 | 2.5203 | 0.58136 |
| XP_022013558.1 XP_022026964.1 | 0.9289 | 1.5977 | 0.5814  |
| XP_021978807.1 XP_022015084.1 | 1.1412 | 1.9624 | 0.58153 |
| XP_022018622.1 XP_022029622.1 | 1.2831 | 2.2062 | 0.58159 |
| XP_022021912.1 XP_022026964.1 | 1.3524 | 2.3251 | 0.58165 |
| XP_022037775.1 XP_035833070.1 | 1.8256 | 3.1384 | 0.5817  |
| XP_021972810.1 XP_021986500.1 | 0.8712 | 1.4974 | 0.58181 |
| XP_022008275.1 XP_022013183.1 | 1.0846 | 1.8637 | 0.58196 |
| XP_022008276.2 XP_022010101.1 | 1.0603 | 1.8216 | 0.58207 |
| XP_022006668.1 XP_022029622.1 | 1.4413 | 2.4757 | 0.58218 |
| XP_022001254.1 XP_022022487.2 | 1.2189 | 2.0936 | 0.5822  |
| XP_022006927.1 XP_022026963.1 | 1.1176 | 1.9191 | 0.58236 |
| XP_021989733.1 XP_035835830.1 | 0.9819 | 1.6858 | 0.58245 |
| XP_022002419.1 XP_022022487.2 | 0.9638 | 1.6547 | 0.58246 |
| XP_021984766.1 XP_022002417.1 | 1.1944 | 2.0504 | 0.58252 |
| XP_021976022.1 XP_022008276.2 | 1.3785 | 2.3663 | 0.58256 |
| XP_022014870.1 XP_022021912.1 | 1.2425 | 2.1324 | 0.58268 |
| XP_021988953.1 XP_022006927.1 | 1.2298 | 2.1101 | 0.58282 |
| XP_021981388.1 XP_022029740.1 | 1.1542 | 1.9803 | 0.58284 |
| XP_021978807.1 XP_022029740.1 | 0.9607 | 1.6479 | 0.58298 |
| XP_021993220.1 XP_022039085.1 | 1.3476 | 2.3114 | 0.58302 |
| XP_022002416.1 XP_022022487.2 | 0.904  | 1.5504 | 0.58308 |
| XP_022002418.1 XP_022002419.1 | 0.1488 | 0.2551 | 0.5833  |
| XP_021969020.1 XP_022006668.1 | 1.6368 | 2.8058 | 0.58336 |
| XP_021993220.1 XP_022010616.1 | 1.3748 | 2.3563 | 0.58346 |
| XP_021981407.1 XP_022029738.1 | 1.162  | 1.9912 | 0.58357 |
| XP_022018622.1 XP_022022487.2 | 1.4897 | 2.5527 | 0.58358 |
| XP_022006926.1 XP_022010295.2 | 0.8701 | 1.4904 | 0.5838  |
| XP_022010101.1 XP_022010294.1 | 0.824  | 1.4112 | 0.5839  |
| XP_022029739.1 XP_022037775.1 | 1.0417 | 1.7828 | 0.58431 |
| XP_021973854.1 XP_022010294.1 | 1.1392 | 1.9496 | 0.58432 |
| XP_021995116.1 XP_022029738.1 | 1.0829 | 1.853  | 0.5844  |
| XP_022002420.1 XP_022029738.1 | 0.4632 | 0.7921 | 0.58477 |
| XP_022010294.1 XP_022021912.1 | 1.1625 | 1.9878 | 0.58482 |
| XP_022002415.1 XP_022006927.1 | 0.947  | 1.619  | 0.58493 |
| XP_021993052.1 XP_022029738.1 | 0.8682 | 1.4842 | 0.58496 |
| XP_021981626.1 XP_022002421.1 | 1.018  | 1.7396 | 0.58519 |
| XP_021973316.1 XP_022002417.1 | 1.0329 | 1.7643 | 0.58544 |
| XP_022006327.1 XP_035835830.1 | 1.2773 | 2.1815 | 0.58551 |
| XP_021995116.1 XP_022002415.1 | 1.1818 | 2.0166 | 0.58604 |
| XP_022010101.1 XP_022013182.1 | 1.3595 | 2.3195 | 0.58612 |
| XP_021972810.1 XP_021993621.2 | 1.0586 | 1.8052 | 0.58642 |
| XP_022002419.1 XP_022026963.1 | 1.0636 | 1.8134 | 0.58652 |
| XP_021976022.1 XP_022006926.1 | 1.3161 | 2.2439 | 0.58652 |
| XP_021981407.1 XP_022035384.1 | 1.2614 | 2.1503 | 0.58662 |
| XP_021993621.2 XP_022002420.1 | 0.902  | 1.5374 | 0.5867  |
| XP_022006927.1 XP_022008276.2 | 1.2443 | 2.1195 | 0.58707 |
| XP_021972810.1 XP_022002420.1 | 0.5969 | 1.0166 | 0.58715 |
| XP_021981407.1 XP_021993052.1 | 1.2725 | 2.1661 | 0.58746 |
| XP_021988953.1 XP_022006327.1 | 1.2705 | 2.1623 | 0.58757 |
| XP_021987457.1 XP_022000224.2 | 1.0221 | 1.7386 | 0.58789 |
| XP_021972810.1 XP_021987458.1 | 1.2094 | 2.0567 | 0.58803 |
| XP_021981388.1 XP_021993222.1 | 1.2827 | 2.181  | 0.58812 |
| XP_021981407.1 XP_022035552.1 | 0.909  | 1.5449 | 0.58839 |
| XP_021987457.1 XP_021993283.1 | 1.5277 | 2.5959 | 0.5885  |
| XP_021993222.1 XP_022002418.1 | 1.0237 | 1.7393 | 0.58857 |
| XP_022006926.1 XP_022018622.1 | 1.0759 | 1.8266 | 0.58902 |
| XP_022002418.1 XP_022002420.1 | 0.1696 | 0.2879 | 0.58909 |
| XP_021969020.1 XP_022022835.1 | 1.4416 | 2.4466 | 0.58923 |
| XP_022010296.1 XP_035835830.1 | 0.729  | 1.2371 | 0.58928 |
| XP_022002416.1 XP_022022835.1 | 1.0273 | 1.743  | 0.58939 |
| XP_022002415.1 XP_022034230.1 | 0.9678 | 1.6419 | 0.58944 |
| XP_021987458.1 XP_022033162.1 | 1.1696 | 1.9841 | 0.58949 |
| XP_021984766.1 XP_022006926.1 | 1.2237 | 2.0756 | 0.58956 |
| XP_021993551.1 XP_022004979.1 | 1.3394 | 2.2714 | 0.58968 |
| XP_022010616.1 XP_022029739.1 | 0.8876 | 1.505  | 0.58977 |
| XP_021969020.1 XP_021989735.1 | 1.2449 | 2.1107 | 0.5898  |
| XP_021989736.1 XP_022010919.1 | 1.1293 | 1.9144 | 0.5899  |
| XP_022010294.1 XP_022018622.1 | 1.054  | 1.7861 | 0.59011 |
| XP_022013239.1 XP_022039074.2 | 1.3416 | 2.2729 | 0.59026 |
| XP_022008275.1 XP_022013182.1 | 1.0713 | 1.8143 | 0.59048 |

|                               |        |        |         |
|-------------------------------|--------|--------|---------|
| XP_021973011.1 XP_022009213.1 | 1.0352 | 1.7522 | 0.5908  |
| XP_021981407.1 XP_021987457.1 | 1.0939 | 1.8511 | 0.59095 |
| XP_022010919.1 XP_022022487.2 | 1.4399 | 2.4363 | 0.59102 |
| XP_021978842.1 XP_022004980.1 | 1.4954 | 2.5299 | 0.59109 |
| XP_022002417.1 XP_022010291.1 | 0.6268 | 1.0603 | 0.59115 |
| XP_021984766.1 XP_021989735.1 | 0.9659 | 1.6332 | 0.59142 |
| XP_021995116.1 XP_022002416.1 | 1.2289 | 2.0776 | 0.5915  |
| XP_021973316.1 XP_021995116.1 | 1.4981 | 2.5326 | 0.59153 |
| XP_022006926.1 XP_022008276.2 | 1.0388 | 1.7557 | 0.59167 |
| XP_021973011.1 XP_022002420.1 | 0.9033 | 1.5261 | 0.5919  |
| XP_021985239.1 XP_021993220.1 | 1.0823 | 1.8263 | 0.59262 |
| XP_021981407.1 XP_021987458.1 | 1.1386 | 1.9203 | 0.59293 |
| XP_022006668.1 XP_022039085.1 | 1.1928 | 2.0108 | 0.5932  |
| XP_021988953.1 XP_021999258.1 | 1.233  | 2.0784 | 0.59324 |
| XP_021981395.1 XP_022035384.1 | 1.3271 | 2.2354 | 0.59367 |
| XP_021981626.1 XP_022013182.1 | 1.2352 | 2.0805 | 0.5937  |
| XP_022029739.1 XP_022039085.1 | 0.8033 | 1.353  | 0.59372 |
| XP_021968895.1 XP_022002418.1 | 0.7687 | 1.2946 | 0.59377 |
| XP_021993052.1 XP_035835830.1 | 0.9967 | 1.6785 | 0.5938  |
| XP_021989736.1 XP_022010101.1 | 1.1087 | 1.8666 | 0.59397 |
| XP_021981626.1 XP_022009213.1 | 1.2477 | 2.099  | 0.59443 |
| XP_022004455.1 XP_022010292.1 | 0.5961 | 1.0028 | 0.59444 |
| XP_021987458.1 XP_022008276.2 | 1.2929 | 2.1743 | 0.59463 |
| XP_022010291.1 XP_022021913.1 | 1.3655 | 2.2947 | 0.59507 |
| XP_022010291.1 XP_022021914.1 | 1.3655 | 2.2947 | 0.59507 |
| XP_021968895.1 XP_021984981.2 | 1.0771 | 1.8094 | 0.59528 |
| XP_021993222.1 XP_021993551.1 | 2.0768 | 3.4864 | 0.59569 |
| XP_022034230.1 XP_035833070.1 | 2.0497 | 3.4372 | 0.59633 |
| XP_022002416.1 XP_022013558.1 | 0.4775 | 0.8006 | 0.59643 |
| XP_022010295.2 XP_035833070.1 | 1.3508 | 2.2633 | 0.59683 |
| XP_021969020.1 XP_022029740.1 | 1.0558 | 1.7689 | 0.59687 |
| XP_021986500.1 XP_022039074.2 | 1.2519 | 2.0973 | 0.59691 |
| XP_022013183.1 XP_022015084.1 | 1.1848 | 1.9844 | 0.59706 |
| XP_022013560.1 XP_022033162.1 | 0.84   | 1.4068 | 0.5971  |
| XP_021992525.1 XP_035833070.1 | 1.5135 | 2.5347 | 0.59711 |
| XP_022001254.1 XP_022004455.1 | 0.9631 | 1.6129 | 0.59712 |
| XP_022010919.1 XP_022013183.1 | 1.2689 | 2.1249 | 0.59716 |
| XP_021989737.1 XP_022010292.1 | 0.9454 | 1.5823 | 0.59748 |
| XP_022037775.1 XP_035842399.1 | 1.3377 | 2.2381 | 0.59769 |
| XP_022006926.1 XP_022013239.1 | 1.3204 | 2.2083 | 0.59793 |
| XP_021999258.1 XP_022013558.1 | 1.0565 | 1.7661 | 0.59821 |
| XP_021981626.1 XP_021993221.1 | 1.7268 | 2.8852 | 0.5985  |
| XP_021993220.1 XP_022035552.1 | 1.4823 | 2.4763 | 0.59859 |
| XP_022002420.1 XP_022029739.1 | 0.4423 | 0.7387 | 0.59875 |
| XP_021978807.1 XP_021989735.1 | 1.144  | 1.9102 | 0.59889 |
| XP_021981395.1 XP_021984981.2 | 0.8436 | 1.4081 | 0.59911 |
| XP_021978842.1 XP_022021912.1 | 1.2413 | 2.0696 | 0.59978 |
| XP_021973011.1 XP_021981407.1 | 1.0899 | 1.8171 | 0.5998  |
| XP_022010101.1 XP_022029622.1 | 1.1113 | 1.8518 | 0.60012 |
| XP_021995117.1 XP_022006927.1 | 1.1959 | 1.9926 | 0.60017 |
| XP_021973011.1 XP_021987457.1 | 1.2772 | 2.1274 | 0.60036 |
| XP_021984981.2 XP_022006327.1 | 1.0825 | 1.8027 | 0.60049 |
| XP_021989734.1 XP_022029738.1 | 1.0681 | 1.7787 | 0.60049 |
| XP_021993621.2 XP_022013182.1 | 1.2308 | 2.049  | 0.60068 |
| XP_022010294.1 XP_022022487.2 | 0.9546 | 1.5889 | 0.60079 |
| XP_022002416.1 XP_022006926.1 | 0.8572 | 1.4264 | 0.60095 |
| XP_022006927.1 XP_022029739.1 | 1.0635 | 1.7696 | 0.60098 |
| XP_022002421.1 XP_022035551.1 | 1.0876 | 1.8097 | 0.60098 |
| XP_022002421.1 XP_022035552.1 | 1.0876 | 1.8097 | 0.60098 |
| XP_022000224.2 XP_022033162.1 | 0.9217 | 1.533  | 0.60124 |
| XP_022002421.1 XP_022010296.1 | 0.6258 | 1.0407 | 0.60133 |
| XP_021989736.1 XP_022006668.1 | 1.1582 | 1.9258 | 0.60141 |
| XP_021978842.1 XP_021989733.1 | 0.9278 | 1.5422 | 0.60161 |
| XP_021978842.1 XP_022008276.2 | 1.2652 | 2.1018 | 0.60196 |
| XP_021984766.1 XP_022004980.1 | 1.625  | 2.6994 | 0.60199 |
| XP_021968895.1 XP_022000196.1 | 1.3062 | 2.1678 | 0.60255 |
| XP_021978807.1 XP_021993221.1 | 1.2053 | 1.9997 | 0.60274 |
| XP_021968895.1 XP_022014870.1 | 1.5807 | 2.6224 | 0.60277 |
| XP_022002421.1 XP_022034230.1 | 1.0114 | 1.6778 | 0.60281 |
| XP_022002416.1 XP_022004455.1 | 0.2289 | 0.3796 | 0.603   |
| XP_022010296.1 XP_035842399.1 | 1.0355 | 1.7169 | 0.60312 |
| XP_021985239.1 XP_021989733.1 | 1.0211 | 1.6912 | 0.60377 |
| XP_021981395.1 XP_022000196.1 | 1.0997 | 1.8207 | 0.604   |
| XP_021995117.1 XP_022013183.1 | 1.1929 | 1.9747 | 0.60409 |
| XP_022004979.1 XP_022008275.1 | 0.8894 | 1.4719 | 0.60425 |
| XP_022022835.1 XP_035835830.1 | 1.2172 | 2.0142 | 0.60431 |
| XP_022009213.1 XP_035842399.1 | 1.6307 | 2.6977 | 0.60448 |
| XP_021984766.1 XP_022029740.1 | 1.1468 | 1.8969 | 0.60457 |
| XP_021993283.1 XP_022018622.1 | 1.3407 | 2.2176 | 0.60457 |
| XP_022006926.1 XP_022029738.1 | 1.0361 | 1.7128 | 0.60492 |
| XP_022002420.1 XP_022013183.1 | 1.1337 | 1.8741 | 0.60493 |
| XP_022013182.1 XP_022033162.1 | 1.2743 | 2.1064 | 0.60497 |
| XP_035838717.1 XP_035842399.1 | 1.6177 | 2.6734 | 0.60511 |
| XP_022006668.1 XP_022022835.1 | 1.3121 | 2.1678 | 0.60527 |
| XP_021993620.1 XP_022002420.1 | 0.941  | 1.554  | 0.60553 |
| XP_022006327.1 XP_022021913.1 | 1.4345 | 2.3686 | 0.60563 |
| XP_022006327.1 XP_022021914.1 | 1.4345 | 2.3686 | 0.60563 |
| XP_021976022.1 XP_022010294.1 | 1.0924 | 1.8035 | 0.60571 |

|                               |        |        |         |
|-------------------------------|--------|--------|---------|
| XP_022002418.1 XP_022005608.1 | 0.8481 | 1.3999 | 0.60583 |
| XP_021993283.1 XP_035835830.1 | 1.5378 | 2.534  | 0.60687 |
| XP_022002419.1 XP_022008275.1 | 1.1092 | 1.8272 | 0.60705 |
| XP_021999258.1 XP_022000224.2 | 1.0729 | 1.767  | 0.60719 |
| XP_021988229.1 XP_022000196.1 | 1.2971 | 2.1361 | 0.60723 |
| XP_021981395.1 XP_021993222.1 | 1.3835 | 2.2777 | 0.60741 |
| XP_022002418.1 XP_022004455.1 | 0.2641 | 0.4346 | 0.60769 |
| XP_021984981.2 XP_021995116.1 | 1.3409 | 2.2054 | 0.60801 |
| XP_021993622.1 XP_022002419.1 | 1.1351 | 1.8667 | 0.60808 |
| XP_022005608.1 XP_022039085.1 | 1.1545 | 1.8986 | 0.60808 |
| XP_022002416.1 XP_022010291.1 | 0.5679 | 0.9339 | 0.6081  |
| XP_022000196.1 XP_022002421.1 | 1.0978 | 1.8051 | 0.60817 |
| XP_021968895.1 XP_021989735.1 | 1.1838 | 1.945  | 0.60864 |
| XP_021973316.1 XP_021984981.2 | 1.2288 | 2.0171 | 0.60919 |
| XP_022010291.1 XP_022039085.1 | 0.7261 | 1.1919 | 0.6092  |
| XP_021968895.1 XP_022013182.1 | 1.1809 | 1.9383 | 0.60925 |
| XP_021993222.1 XP_022013558.1 | 1.2516 | 2.0543 | 0.60926 |
| XP_021981626.1 XP_022013560.1 | 1.1547 | 1.895  | 0.60934 |
| XP_021981395.1 XP_022010291.1 | 0.9824 | 1.6122 | 0.60935 |
| XP_021968895.1 XP_022022487.2 | 0.9869 | 1.6194 | 0.60942 |
| XP_022013558.1 XP_022022835.1 | 0.9885 | 1.622  | 0.60943 |
| XP_022000196.1 XP_022004455.1 | 1.1606 | 1.904  | 0.60956 |
| XP_022006926.1 XP_022035551.1 | 1.26   | 2.0665 | 0.60973 |
| XP_022006926.1 XP_022035552.1 | 1.26   | 2.0665 | 0.60973 |
| XP_022002417.1 XP_022033162.1 | 0.6832 | 1.1205 | 0.60973 |
| XP_021989735.1 XP_022002421.1 | 0.9489 | 1.5562 | 0.60975 |
| XP_021993220.1 XP_022002416.1 | 0.9441 | 1.5479 | 0.60992 |
| XP_021989737.1 XP_022002419.1 | 0.9117 | 1.4942 | 0.61016 |
| XP_021984766.1 XP_021987457.1 | 1.112  | 1.8222 | 0.61025 |
| XP_021984766.1 XP_021987458.1 | 1.112  | 1.8222 | 0.61025 |
| XP_022010296.1 XP_035833070.1 | 1.4278 | 2.3394 | 0.61033 |
| XP_022018622.1 XP_035835830.1 | 1.1117 | 1.8211 | 0.61046 |
| XP_022002415.1 XP_022005608.1 | 0.8398 | 1.3755 | 0.61054 |
| XP_021976022.1 XP_035833070.1 | 1.4269 | 2.3364 | 0.61073 |
| XP_021981407.1 XP_022035551.1 | 0.9059 | 1.4829 | 0.6109  |
| XP_021981626.1 XP_022010616.1 | 1.3046 | 2.1354 | 0.61094 |
| XP_022026964.1 XP_022029739.1 | 1.0018 | 1.6397 | 0.61097 |
| XP_021981626.1 XP_022013183.1 | 1.3058 | 2.1368 | 0.6111  |
| XP_021993221.1 XP_022029739.1 | 1.3485 | 2.2066 | 0.61112 |
| XP_021969020.1 XP_022029738.1 | 1.3386 | 2.1904 | 0.61112 |
| XP_021987458.1 XP_021993622.1 | 1.3264 | 2.1699 | 0.61127 |
| XP_022013560.1 XP_022029738.1 | 0.6528 | 1.0678 | 0.61135 |
| XP_021978807.1 XP_022034230.1 | 1.1394 | 1.8637 | 0.61136 |
| XP_022002418.1 XP_022010292.1 | 0.5421 | 0.886  | 0.61185 |
| XP_021989735.1 XP_022029738.1 | 0.9895 | 1.6172 | 0.61186 |
| XP_022006668.1 XP_022035551.1 | 1.355  | 2.2125 | 0.61243 |
| XP_022006668.1 XP_022035552.1 | 1.355  | 2.2125 | 0.61243 |
| XP_022006327.1 XP_022021911.1 | 1.3865 | 2.2632 | 0.61263 |
| XP_021993220.1 XP_022002417.1 | 1.0227 | 1.6693 | 0.61265 |
| XP_021993220.1 XP_022013560.1 | 1.0497 | 1.7111 | 0.61347 |
| XP_022002418.1 XP_022006327.1 | 1.1197 | 1.8252 | 0.61347 |
| XP_021992525.1 XP_022014870.1 | 1.0077 | 1.6426 | 0.61348 |
| XP_021984981.2 XP_022006926.1 | 1.4408 | 2.3482 | 0.61358 |
| XP_021987458.1 XP_022000224.2 | 1.0592 | 1.7261 | 0.61364 |
| XP_022006668.1 XP_022018622.1 | 1.2586 | 2.0508 | 0.61371 |
| XP_022008276.2 XP_035838717.1 | 1.2267 | 1.9979 | 0.61399 |
| XP_022033162.1 XP_022039085.1 | 0.858  | 1.3974 | 0.614   |
| XP_021981407.1 XP_022002421.1 | 1.0443 | 1.7007 | 0.61404 |
| XP_021981626.1 XP_022018622.1 | 1.4996 | 2.4412 | 0.61429 |
| XP_021984981.2 XP_022000196.1 | 1.2572 | 2.0463 | 0.61438 |
| XP_021984766.1 XP_021995117.1 | 1.0527 | 1.7134 | 0.61439 |
| XP_022002417.1 XP_022008276.2 | 1.1005 | 1.79   | 0.6148  |
| XP_021987458.1 XP_021993283.1 | 1.5653 | 2.5459 | 0.61483 |
| XP_022002417.1 XP_022002420.1 | 0.1508 | 0.2452 | 0.61501 |
| XP_021989735.1 XP_022013560.1 | 0.9468 | 1.5387 | 0.61532 |
| XP_022002417.1 XP_022002419.1 | 0.136  | 0.2209 | 0.61566 |
| XP_021968895.1 XP_021992525.1 | 1.2303 | 1.9983 | 0.61567 |
| XP_021989735.1 XP_022013239.1 | 1.4341 | 2.3291 | 0.61573 |
| XP_021968895.1 XP_022029739.1 | 0.8347 | 1.3556 | 0.61574 |
| XP_021981626.1 XP_035838717.1 | 1.1909 | 1.9335 | 0.61593 |
| XP_022002415.1 XP_022022835.1 | 0.9933 | 1.6124 | 0.61604 |
| XP_022010919.1 XP_022034230.1 | 1.3245 | 2.1497 | 0.61613 |
| XP_021995117.1 XP_022002421.1 | 0.9285 | 1.5068 | 0.61621 |
| XP_021973011.1 XP_021973854.1 | 1.4428 | 2.3407 | 0.6164  |
| XP_021972810.1 XP_022006668.1 | 1.186  | 1.9237 | 0.61652 |
| XP_021972810.1 XP_022029622.1 | 1.1744 | 1.9042 | 0.61674 |
| XP_022010291.1 XP_022021911.1 | 1.3518 | 2.1912 | 0.61692 |
| XP_022004980.1 XP_022022487.2 | 1.7396 | 2.8197 | 0.61695 |
| XP_021993620.1 XP_035842399.1 | 1.5125 | 2.4514 | 0.61699 |
| XP_022004980.1 XP_035838717.1 | 1.1123 | 1.8027 | 0.61702 |
| XP_022002421.1 XP_022013558.1 | 0.5573 | 0.9032 | 0.61703 |
| XP_022000224.2 XP_022010292.1 | 0.8339 | 1.3512 | 0.61716 |
| XP_021989737.1 XP_022010296.1 | 0.9908 | 1.6045 | 0.61751 |
| XP_022014870.1 XP_022021911.1 | 1.1739 | 1.9003 | 0.61774 |
| XP_021988229.1 XP_022029622.1 | 1.3943 | 2.2561 | 0.61801 |
| XP_021973316.1 XP_022002416.1 | 1.0305 | 1.6673 | 0.61807 |
| XP_021999258.1 XP_022002417.1 | 1.1021 | 1.7831 | 0.61808 |
| XP_021969020.1 XP_021989736.1 | 1.2151 | 1.9656 | 0.61818 |

|                               |        |        |         |
|-------------------------------|--------|--------|---------|
| XP_021993620.1 XP_022001254.1 | 1.1918 | 1.9279 | 0.61819 |
| XP_021993221.1 XP_022022487.2 | 1.4581 | 2.3586 | 0.61821 |
| XP_021988953.1 XP_021989737.1 | 1      | 1.6175 | 0.61824 |
| XP_022000196.1 XP_035833070.1 | 1.59   | 2.5716 | 0.61829 |
| XP_021968895.1 XP_022009213.1 | 1.3836 | 2.2356 | 0.61889 |
| XP_022002418.1 XP_022010296.1 | 0.558  | 0.9014 | 0.61904 |
| XP_021993052.1 XP_022033162.1 | 1.0154 | 1.6402 | 0.61907 |
| XP_021985239.1 XP_021993621.2 | 1.1786 | 1.9037 | 0.61911 |
| XP_022010296.1 XP_022039085.1 | 0.7085 | 1.1442 | 0.61921 |
| XP_021993222.1 XP_022013182.1 | 1.5475 | 2.4969 | 0.61977 |
| XP_021978807.1 XP_021993222.1 | 1.332  | 2.149  | 0.61982 |
| XP_021985239.1 XP_022013182.1 | 1.189  | 1.9179 | 0.61995 |
| XP_021981407.1 XP_022006668.1 | 1.1724 | 1.891  | 0.61999 |
| XP_021987457.1 XP_022002417.1 | 1.1855 | 1.9109 | 0.62039 |
| XP_021989733.1 XP_022002417.1 | 1.0118 | 1.6307 | 0.62047 |
| XP_021972810.1 XP_021984981.2 | 1.0319 | 1.663  | 0.62051 |
| XP_021987457.1 XP_022004980.1 | 1.3519 | 2.1773 | 0.62091 |
| XP_021981626.1 XP_022010295.2 | 0.9938 | 1.6005 | 0.62093 |
| XP_021981407.1 XP_022033162.1 | 1.1653 | 1.8765 | 0.621   |
| XP_022000224.2 XP_022029738.1 | 0.9226 | 1.4856 | 0.62103 |
| XP_022002421.1 XP_022026963.1 | 1.0718 | 1.7257 | 0.62108 |
| XP_021988229.1 XP_022002419.1 | 0.881  | 1.418  | 0.6213  |
| XP_021978807.1 XP_022004979.1 | 1.2724 | 2.0475 | 0.62144 |
| XP_022002420.1 XP_022010291.1 | 0.5565 | 0.8952 | 0.62165 |
| XP_022010616.1 XP_022010919.1 | 1.0418 | 1.6754 | 0.62182 |
| XP_021989734.1 XP_022002421.1 | 1.0211 | 1.6421 | 0.62183 |
| XP_021993621.2 XP_022008275.1 | 1.1547 | 1.8567 | 0.62191 |
| XP_021969020.1 XP_021993222.1 | 1.3531 | 2.1756 | 0.62194 |
| XP_021993052.1 XP_022034230.1 | 1.184  | 1.9037 | 0.62195 |
| XP_022004455.1 XP_022010295.2 | 0.6098 | 0.9804 | 0.62199 |
| XP_022001254.1 XP_022029739.1 | 1.2271 | 1.9727 | 0.62204 |
| XP_021973011.1 XP_022010295.2 | 0.9745 | 1.5661 | 0.62225 |
| XP_022002417.1 XP_022004980.1 | 1.1885 | 1.9096 | 0.62238 |
| XP_022010919.1 XP_022037775.1 | 1.2427 | 1.9961 | 0.62256 |
| XP_022002415.1 XP_022010292.1 | 0.5252 | 0.8434 | 0.62272 |
| XP_022006668.1 XP_022037775.1 | 1.0528 | 1.6905 | 0.62277 |
| XP_021981407.1 XP_021993621.2 | 1.178  | 1.8913 | 0.62285 |
| XP_022013182.1 XP_022018622.1 | 1.5219 | 2.4431 | 0.62294 |
| XP_022022487.2 XP_022029738.1 | 1.0795 | 1.7329 | 0.62294 |
| XP_021981395.1 XP_022039085.1 | 1.15   | 1.8459 | 0.623   |
| XP_021993283.1 XP_035842399.1 | 1.4226 | 2.2834 | 0.62302 |
| XP_021999258.1 XP_035835830.1 | 1.193  | 1.9136 | 0.62343 |
| XP_022010616.1 XP_022039074.2 | 1.3351 | 2.1415 | 0.62344 |
| XP_021986500.1 XP_022029739.1 | 0.8674 | 1.3912 | 0.62349 |
| XP_021973011.1 XP_022022835.1 | 1.0282 | 1.6479 | 0.62395 |
| XP_021987458.1 XP_022002417.1 | 1.2015 | 1.9256 | 0.62396 |
| XP_021984981.2 XP_022014870.1 | 0.7857 | 1.2585 | 0.62431 |
| XP_022002419.1 XP_022013558.1 | 0.5634 | 0.9024 | 0.62434 |
| XP_021993622.1 XP_022002417.1 | 1.1619 | 1.8609 | 0.62438 |
| XP_022010291.1 XP_022034230.1 | 0.9469 | 1.5155 | 0.62481 |
| XP_022022835.1 XP_022029740.1 | 1.016  | 1.6259 | 0.62488 |
| XP_021981388.1 XP_022026963.1 | 1.3912 | 2.2256 | 0.62509 |
| XP_021973011.1 XP_021981626.1 | 1.2167 | 1.946  | 0.62523 |
| XP_021992525.1 XP_022033162.1 | 1.2166 | 1.945  | 0.6255  |
| XP_021999258.1 XP_022008276.2 | 1.5393 | 2.4599 | 0.62576 |
| XP_022002417.1 XP_022014870.1 | 1.0399 | 1.6616 | 0.62584 |
| XP_021978842.1 XP_021981407.1 | 1.0283 | 1.6426 | 0.62602 |
| XP_022021911.1 XP_022033162.1 | 1.2965 | 2.0709 | 0.62606 |
| XP_022021913.1 XP_022033162.1 | 1.2965 | 2.0709 | 0.62606 |
| XP_022021914.1 XP_022033162.1 | 1.2965 | 2.0709 | 0.62606 |
| XP_022002415.1 XP_035835830.1 | 0.4889 | 0.7808 | 0.62615 |
| XP_021985239.1 XP_022013183.1 | 1.1373 | 1.816  | 0.62627 |
| XP_021973011.1 XP_022006927.1 | 1.1653 | 1.86   | 0.62651 |
| XP_021989733.1 XP_022010919.1 | 1.1836 | 1.8892 | 0.62651 |
| XP_022010294.1 XP_022013558.1 | 0.2806 | 0.4475 | 0.62704 |
| XP_021989733.1 XP_022002415.1 | 0.995  | 1.5867 | 0.62709 |
| XP_021981388.1 XP_021981395.1 | 0.0604 | 0.0963 | 0.62721 |
| XP_022010295.2 XP_022013558.1 | 0.1459 | 0.2326 | 0.62726 |
| XP_021981407.1 XP_022034230.1 | 1.2242 | 1.9513 | 0.62738 |
| XP_022010291.1 XP_022010294.1 | 0.6007 | 0.9574 | 0.62743 |
| XP_021976022.1 XP_021981407.1 | 1.2261 | 1.9538 | 0.62755 |
| XP_021969020.1 XP_022013560.1 | 1.0814 | 1.7232 | 0.62755 |
| XP_022002419.1 XP_022035551.1 | 0.9876 | 1.5737 | 0.62757 |
| XP_022002419.1 XP_022035552.1 | 0.9876 | 1.5737 | 0.62757 |
| XP_022022487.2 XP_035842399.1 | 1.5927 | 2.5369 | 0.62781 |
| XP_021973011.1 XP_022002419.1 | 0.9954 | 1.5853 | 0.62789 |
| XP_022018622.1 XP_022022835.1 | 1.3066 | 2.0799 | 0.6282  |
| XP_022002415.1 XP_022002419.1 | 0.1413 | 0.2249 | 0.62828 |
| XP_021989737.1 XP_022029738.1 | 0.9933 | 1.5807 | 0.62839 |
| XP_022005608.1 XP_022029739.1 | 0.9426 | 1.4994 | 0.62865 |
| XP_021993052.1 XP_022021911.1 | 1.0913 | 1.735  | 0.62899 |
| XP_021993052.1 XP_022021913.1 | 1.0913 | 1.735  | 0.62899 |
| XP_021993052.1 XP_022021914.1 | 1.0913 | 1.735  | 0.62899 |
| XP_021988953.1 XP_022026964.1 | 1.2235 | 1.945  | 0.62905 |
| XP_021999258.1 XP_022002419.1 | 1.0144 | 1.6124 | 0.62912 |
| XP_022002418.1 XP_035835830.1 | 0.4821 | 0.7662 | 0.62921 |
| XP_022001254.1 XP_022002416.1 | 1.0091 | 1.6036 | 0.62927 |
| XP_021987457.1 XP_021988229.1 | 1.0371 | 1.6479 | 0.62935 |

|                               |        |        |         |
|-------------------------------|--------|--------|---------|
| XP_021989734.1 XP_022035552.1 | 0.9525 | 1.5133 | 0.62942 |
| XP_021992525.1 XP_022010101.1 | 1.5208 | 2.4159 | 0.6295  |
| XP_021985239.1 XP_022034230.1 | 1.2825 | 2.0367 | 0.6297  |
| XP_021981626.1 XP_021987457.1 | 1.1211 | 1.7798 | 0.6299  |
| XP_021973316.1 XP_022010616.1 | 1.2635 | 2.0056 | 0.62999 |
| XP_022001254.1 XP_022002418.1 | 1.0315 | 1.6367 | 0.63023 |
| XP_022002421.1 XP_022008275.1 | 1.0784 | 1.7111 | 0.63024 |
| XP_022002415.1 XP_022004455.1 | 0.2187 | 0.347  | 0.63026 |
| XP_021981395.1 XP_022014870.1 | 1.0148 | 1.6097 | 0.63043 |
| XP_022013558.1 XP_022039074.2 | 0.7117 | 1.1289 | 0.63044 |
| XP_021995116.1 XP_022033162.1 | 1.6207 | 2.5705 | 0.6305  |
| XP_021988229.1 XP_022014870.1 | 1.3353 | 2.1169 | 0.63078 |
| XP_022004455.1 XP_022013239.1 | 1.0716 | 1.6988 | 0.6308  |
| XP_021984766.1 XP_021985239.1 | 1.0935 | 1.7331 | 0.63095 |
| XP_022006668.1 XP_022010291.1 | 1.0809 | 1.7128 | 0.63107 |
| XP_022022487.2 XP_022039085.1 | 1.0851 | 1.7191 | 0.6312  |
| XP_022002419.1 XP_022035384.1 | 1.334  | 2.1133 | 0.63124 |
| XP_021999258.1 XP_022039074.2 | 1.3043 | 2.0662 | 0.63126 |
| XP_021989736.1 XP_022000196.1 | 1.0828 | 1.7146 | 0.63152 |
| XP_021984981.2 XP_035842399.1 | 1.2053 | 1.908  | 0.63171 |
| XP_021993283.1 XP_022033162.1 | 1.5813 | 2.503  | 0.63176 |
| XP_021973011.1 XP_022010101.1 | 1.0872 | 1.7206 | 0.63187 |
| XP_021993621.2 XP_022029739.1 | 1.0927 | 1.7288 | 0.63206 |
| XP_021973316.1 XP_022000196.1 | 1.2874 | 2.0363 | 0.63223 |
| XP_022010616.1 XP_022021911.1 | 1.0522 | 1.6641 | 0.63229 |
| XP_022010616.1 XP_022021913.1 | 1.0522 | 1.6641 | 0.63229 |
| XP_022010616.1 XP_022021914.1 | 1.0522 | 1.6641 | 0.63229 |
| XP_021989737.1 XP_022026964.1 | 1.0935 | 1.7282 | 0.63274 |
| XP_021968895.1 XP_021976022.1 | 1.1692 | 1.8478 | 0.63275 |
| XP_022008275.1 XP_035838717.1 | 1.0933 | 1.7277 | 0.63281 |
| XP_021968895.1 XP_022039085.1 | 0.7875 | 1.2444 | 0.63284 |
| XP_021988229.1 XP_022002415.1 | 0.791  | 1.2497 | 0.63295 |
| XP_021978842.1 XP_021992525.1 | 1.3269 | 2.0961 | 0.63303 |
| XP_021989737.1 XP_022039074.2 | 1.18   | 1.8637 | 0.63315 |
| XP_021989736.1 XP_022013239.1 | 1.3863 | 2.1892 | 0.63325 |
| XP_022013182.1 XP_022026964.1 | 1.1975 | 1.89   | 0.6336  |
| XP_022013183.1 XP_022026964.1 | 1.1975 | 1.89   | 0.6336  |
| XP_021995116.1 XP_022022487.2 | 1.3485 | 2.127  | 0.63399 |
| XP_021993620.1 XP_022002415.1 | 0.9091 | 1.4337 | 0.63409 |
| XP_022004455.1 XP_022006926.1 | 1.019  | 1.6068 | 0.63418 |
| XP_022006927.1 XP_022013560.1 | 0.8533 | 1.3452 | 0.63433 |
| XP_022039074.2 XP_022039085.1 | 0.8645 | 1.3626 | 0.63445 |
| XP_021988229.1 XP_022002416.1 | 0.8224 | 1.2961 | 0.63452 |
| XP_021978842.1 XP_021981388.1 | 0.9659 | 1.5222 | 0.63454 |
| XP_022021912.1 XP_022029739.1 | 1.053  | 1.6594 | 0.63457 |
| XP_022006926.1 XP_022039085.1 | 0.9412 | 1.4831 | 0.63462 |
| XP_022029740.1 XP_022033162.1 | 0.6839 | 1.0776 | 0.63465 |
| XP_021981388.1 XP_021993220.1 | 1.1895 | 1.872  | 0.63542 |
| XP_022018622.1 XP_022035384.1 | 1.2159 | 1.9131 | 0.63557 |
| XP_021989733.1 XP_022014870.1 | 0.9992 | 1.5721 | 0.63558 |
| XP_021995117.1 XP_035838717.1 | 0.9952 | 1.5657 | 0.63563 |
| XP_021968895.1 XP_035833070.1 | 1.2091 | 1.9018 | 0.63577 |
| XP_021984766.1 XP_022002416.1 | 1.0716 | 1.6849 | 0.636   |
| XP_022002416.1 XP_022002420.1 | 0.1474 | 0.2317 | 0.63617 |
| XP_022013560.1 XP_022039085.1 | 0.7468 | 1.1736 | 0.63633 |
| XP_022006926.1 XP_022029740.1 | 0.8991 | 1.4117 | 0.63689 |
| XP_021968895.1 XP_022013239.1 | 1.2752 | 2.0016 | 0.63709 |
| XP_022002415.1 XP_022010296.1 | 0.5444 | 0.8545 | 0.6371  |
| XP_021989737.1 XP_022033162.1 | 1.2299 | 1.9303 | 0.63715 |
| XP_022010292.1 XP_035838717.1 | 0.9505 | 1.4914 | 0.63732 |
| XP_021981407.1 XP_022026963.1 | 1.4369 | 2.2534 | 0.63766 |
| XP_022002419.1 XP_022010291.1 | 0.5133 | 0.8049 | 0.63772 |
| XP_021972810.1 XP_022010296.1 | 0.7275 | 1.1407 | 0.63777 |
| XP_021976022.1 XP_021988953.1 | 1.8441 | 2.8913 | 0.63781 |
| XP_021973316.1 XP_021988953.1 | 1.4774 | 2.316  | 0.63791 |
| XP_021988953.1 XP_021989735.1 | 0.9728 | 1.5246 | 0.63807 |
| XP_021985239.1 XP_022039085.1 | 0.7849 | 1.23   | 0.63813 |
| XP_021986500.1 XP_021988953.1 | 1.0454 | 1.6377 | 0.63833 |
| XP_022010292.1 XP_022013183.1 | 1.2737 | 1.9949 | 0.63848 |
| XP_022004979.1 XP_022013183.1 | 1.2063 | 1.8888 | 0.63866 |
| XP_022002419.1 XP_022004455.1 | 0.1897 | 0.297  | 0.63872 |
| XP_022006927.1 XP_035842399.1 | 1.3208 | 2.0673 | 0.6389  |
| XP_022004455.1 XP_022009213.1 | 0.9894 | 1.5484 | 0.63898 |
| XP_021981626.1 XP_021987458.1 | 1.0927 | 1.7099 | 0.63904 |
| XP_021968895.1 XP_021999258.1 | 1.2963 | 2.0279 | 0.63923 |
| XP_021989734.1 XP_022010919.1 | 1.135  | 1.7753 | 0.63933 |
| XP_022002417.1 XP_035835830.1 | 0.4917 | 0.769  | 0.6394  |
| XP_021989736.1 XP_022029738.1 | 1.1178 | 1.7464 | 0.64006 |
| XP_021995117.1 XP_022026963.1 | 1.003  | 1.5668 | 0.64016 |
| XP_021978842.1 XP_021989735.1 | 0.9742 | 1.5218 | 0.64016 |
| XP_022021911.1 XP_022029738.1 | 1.0985 | 1.7156 | 0.6403  |
| XP_022021913.1 XP_022029738.1 | 1.0985 | 1.7156 | 0.6403  |
| XP_022021914.1 XP_022029738.1 | 1.0985 | 1.7156 | 0.6403  |
| XP_022010919.1 XP_022029622.1 | 1.1949 | 1.8653 | 0.64059 |
| XP_022004455.1 XP_022010296.1 | 0.6386 | 0.9968 | 0.64065 |
| XP_022006926.1 XP_022013560.1 | 0.8231 | 1.2846 | 0.64074 |
| XP_021987457.1 XP_021993622.1 | 1.3375 | 2.0871 | 0.64084 |
| XP_021987457.1 XP_022029738.1 | 1.2659 | 1.9748 | 0.64103 |



|                               |        |        |         |
|-------------------------------|--------|--------|---------|
| XP_021999258.1 XP_022010295.2 | 1.0397 | 1.6218 | 0.64108 |
| XP_021968895.1 XP_022000224.2 | 1.2006 | 1.8722 | 0.64128 |
| XP_022002415.1 XP_022033162.1 | 0.6835 | 1.0656 | 0.64142 |
| XP_021973011.1 XP_035833070.1 | 1.4167 | 2.2083 | 0.64153 |
| XP_021973854.1 XP_021992525.1 | 1.4617 | 2.2784 | 0.64155 |
| XP_021969020.1 XP_021989737.1 | 1.3643 | 2.1249 | 0.64205 |
| XP_021993220.1 XP_021995117.1 | 1.0441 | 1.6259 | 0.64217 |
| XP_021989735.1 XP_022033162.1 | 1.2163 | 1.8938 | 0.64225 |
| XP_021993220.1 XP_022035551.1 | 1.4647 | 2.2791 | 0.64267 |
| XP_021989734.1 XP_022006327.1 | 1.2975 | 2.0181 | 0.64293 |
| XP_022014870.1 XP_022029738.1 | 0.8942 | 1.3904 | 0.64312 |
| XP_022010294.1 XP_022039085.1 | 0.7303 | 1.1355 | 0.64315 |
| XP_022013558.1 XP_035833070.1 | 1.3228 | 2.0565 | 0.64323 |
| XP_022002416.1 XP_022033162.1 | 0.6907 | 1.0736 | 0.64335 |
| XP_021972810.1 XP_022034230.1 | 1.1104 | 1.7259 | 0.64337 |
| XP_022034230.1 XP_022039074.2 | 1.1889 | 1.8479 | 0.64338 |
| XP_021969020.1 XP_022013558.1 | 1.0432 | 1.6206 | 0.64371 |
| XP_021981626.1 XP_022022835.1 | 1.2034 | 1.8682 | 0.64415 |
| XP_021969020.1 XP_035833070.1 | 2.0326 | 3.1552 | 0.64421 |
| XP_021978807.1 XP_021993620.1 | 1.2411 | 1.9262 | 0.64433 |
| XP_021973316.1 XP_021989737.1 | 1.3598 | 2.1101 | 0.64442 |
| XP_021968895.1 XP_021981388.1 | 1.1473 | 1.7795 | 0.64473 |
| XP_022002421.1 XP_022010295.2 | 0.5955 | 0.9235 | 0.64483 |
| XP_021984766.1 XP_022029738.1 | 1.1648 | 1.8059 | 0.645   |
| XP_022006926.1 XP_022013558.1 | 0.8484 | 1.3152 | 0.64507 |
| XP_021973011.1 XP_022002416.1 | 0.9503 | 1.4731 | 0.6451  |
| XP_021968895.1 XP_022002419.1 | 0.7616 | 1.1805 | 0.64515 |
| XP_021987458.1 XP_022021913.1 | 1.2188 | 1.8882 | 0.64548 |
| XP_021987458.1 XP_022021914.1 | 1.2188 | 1.8882 | 0.64548 |
| XP_022000196.1 XP_022008276.2 | 1.8991 | 2.9421 | 0.64549 |
| XP_021981626.1 XP_022029739.1 | 1.1859 | 1.8372 | 0.64549 |
| XP_021969020.1 XP_022000224.2 | 1.2866 | 1.9931 | 0.64553 |
| XP_021988229.1 XP_022029738.1 | 0.8192 | 1.2683 | 0.6459  |
| XP_021993551.1 XP_022021912.1 | 1.4749 | 2.2834 | 0.64592 |
| XP_021968895.1 XP_022002415.1 | 0.7744 | 1.1985 | 0.64614 |
| XP_021993622.1 XP_022026964.1 | 1.0502 | 1.625  | 0.64628 |
| XP_021989737.1 XP_022006327.1 | 1.2185 | 1.8853 | 0.64632 |
| XP_021981407.1 XP_022014870.1 | 0.902  | 1.3956 | 0.64632 |
| XP_021988229.1 XP_022008276.2 | 1.2983 | 2.0086 | 0.64637 |
| XP_021989734.1 XP_022035551.1 | 0.9477 | 1.4659 | 0.6465  |
| XP_021993551.1 XP_022022487.2 | 1.3302 | 2.0563 | 0.64689 |
| XP_022010294.1 XP_035842399.1 | 1.0556 | 1.6317 | 0.64693 |
| XP_022004455.1 XP_022004980.1 | 1.1945 | 1.8461 | 0.64704 |
| XP_022005608.1 XP_022039074.2 | 1.1957 | 1.8477 | 0.64713 |
| XP_022006926.1 XP_022010294.1 | 0.8052 | 1.2441 | 0.64721 |
| XP_022001254.1 XP_022002417.1 | 1.0562 | 1.6318 | 0.64726 |
| XP_035835830.1 XP_035842399.1 | 1.2973 | 2.004  | 0.64736 |
| XP_021989735.1 XP_022010919.1 | 1.1796 | 1.8218 | 0.64749 |
| XP_021981626.1 XP_022029738.1 | 1.1966 | 1.848  | 0.64751 |
| XP_021989733.1 XP_022005608.1 | 1.0415 | 1.6084 | 0.64754 |
| XP_021976022.1 XP_022015084.1 | 1.2851 | 1.9844 | 0.6476  |
| XP_021995117.1 XP_022029738.1 | 1.0847 | 1.6742 | 0.64789 |
| XP_022002417.1 XP_022021911.1 | 1.1199 | 1.7284 | 0.64794 |
| XP_021978807.1 XP_021989734.1 | 1.173  | 1.8102 | 0.64799 |
| XP_021973011.1 XP_022002418.1 | 0.9399 | 1.4504 | 0.64803 |
| XP_021981626.1 XP_022033162.1 | 1.1212 | 1.7299 | 0.64813 |
| XP_022002415.1 XP_022014870.1 | 0.9342 | 1.441  | 0.6483  |
| XP_021989733.1 XP_022004980.1 | 1.0223 | 1.5764 | 0.6485  |
| XP_021993222.1 XP_022029740.1 | 1.1311 | 1.7436 | 0.64872 |
| XP_021987457.1 XP_022013182.1 | 1.1717 | 1.8059 | 0.64882 |
| XP_021989736.1 XP_035842399.1 | 1.6732 | 2.5784 | 0.64893 |
| XP_021988953.1 XP_022021912.1 | 1.3166 | 2.0287 | 0.64899 |
| XP_021993620.1 XP_022002419.1 | 0.9738 | 1.4995 | 0.64942 |
| XP_022010292.1 XP_022010294.1 | 0.3095 | 0.4765 | 0.64953 |
| XP_021986500.1 XP_022033162.1 | 1.3157 | 2.0256 | 0.64954 |
| XP_021988229.1 XP_022006668.1 | 1.102  | 1.6963 | 0.64965 |
| XP_021978842.1 XP_021984981.2 | 1.1521 | 1.7727 | 0.64991 |
| XP_021973316.1 XP_022022487.2 | 1.4882 | 2.2897 | 0.64995 |
| XP_022000196.1 XP_022026964.1 | 1.0723 | 1.6479 | 0.65071 |
| XP_021992525.1 XP_022026964.1 | 1.2457 | 1.9138 | 0.6509  |
| XP_021984766.1 XP_022006327.1 | 1.3408 | 2.0599 | 0.65091 |
| XP_021968895.1 XP_035835830.1 | 0.7953 | 1.2215 | 0.65108 |
| XP_022010919.1 XP_022029739.1 | 0.9805 | 1.5059 | 0.65111 |
| XP_022006327.1 XP_035842399.1 | 1.4676 | 2.253  | 0.6514  |
| XP_021989736.1 XP_022034230.1 | 1.1444 | 1.7557 | 0.65182 |
| XP_021993622.1 XP_022000196.1 | 1.5739 | 2.4142 | 0.65193 |
| XP_021989736.1 XP_022006926.1 | 1.2742 | 1.9543 | 0.652   |
| XP_022006668.1 XP_022021911.1 | 1.1586 | 1.7767 | 0.65211 |
| XP_022006668.1 XP_022021913.1 | 1.1586 | 1.7767 | 0.65211 |
| XP_022006668.1 XP_022021914.1 | 1.1586 | 1.7767 | 0.65211 |
| XP_021981395.1 XP_022008276.2 | 1.434  | 2.1987 | 0.6522  |
| XP_021995117.1 XP_035833070.1 | 1.3605 | 2.0857 | 0.6523  |
| XP_021973011.1 XP_022010616.1 | 1.1287 | 1.7302 | 0.65235 |
| XP_022002417.1 XP_022010919.1 | 0.9602 | 1.4716 | 0.65249 |
| XP_021995117.1 XP_022026964.1 | 0.9108 | 1.3956 | 0.65262 |
| XP_021987457.1 XP_022001254.1 | 1.2566 | 1.9252 | 0.65271 |
| XP_021973855.1 XP_021992525.1 | 1.7657 | 2.7034 | 0.65314 |
| XP_021981626.1 XP_021989733.1 | 1.2067 | 1.8474 | 0.65319 |

|                |                |        |        |         |
|----------------|----------------|--------|--------|---------|
| XP_021995117.1 | XP_022002420.1 | 0.9059 | 1.3868 | 0.65323 |
| XP_021973011.1 | XP_021989737.1 | 1.0433 | 1.5968 | 0.65337 |
| XP_021988953.1 | XP_022002421.1 | 1.1204 | 1.7145 | 0.65348 |
| XP_021993220.1 | XP_022002418.1 | 0.9692 | 1.4831 | 0.6535  |
| XP_022002420.1 | XP_022010294.1 | 0.5634 | 0.8621 | 0.65352 |
| XP_022004455.1 | XP_022008275.1 | 1.1092 | 1.6969 | 0.65366 |
| XP_022002419.1 | XP_022010292.1 | 0.5798 | 0.887  | 0.65366 |
| XP_021995116.1 | XP_022002417.1 | 1.3092 | 2.0023 | 0.65385 |
| XP_021981388.1 | XP_021995116.1 | 1.2511 | 1.9134 | 0.65386 |
| XP_021987457.1 | XP_022010291.1 | 1.1616 | 1.7764 | 0.65391 |
| XP_022002420.1 | XP_022026964.1 | 0.8817 | 1.3482 | 0.65398 |
| XP_021992525.1 | XP_022029739.1 | 1.5593 | 2.3835 | 0.65421 |
| XP_021999258.1 | XP_022029739.1 | 1.0863 | 1.6604 | 0.65424 |
| XP_022002416.1 | XP_022026963.1 | 0.9784 | 1.495  | 0.65445 |
| XP_022002417.1 | XP_022026963.1 | 0.9784 | 1.495  | 0.65445 |
| XP_021987458.1 | XP_022010296.1 | 1.2507 | 1.9095 | 0.65499 |
| XP_022002416.1 | XP_022002419.1 | 0.135  | 0.2061 | 0.65502 |
| XP_021986500.1 | XP_021989737.1 | 0.9461 | 1.444  | 0.65519 |
| XP_021993220.1 | XP_022008276.2 | 1.3566 | 2.0701 | 0.65533 |
| XP_021988229.1 | XP_022006327.1 | 1.503  | 2.2924 | 0.65564 |
| XP_021989734.1 | XP_022029740.1 | 1.1623 | 1.7727 | 0.65567 |
| XP_022002417.1 | XP_022022835.1 | 1.0625 | 1.6204 | 0.6557  |
| XP_022002418.1 | XP_022022835.1 | 1.0087 | 1.5382 | 0.65577 |
| XP_021993220.1 | XP_022002419.1 | 0.9603 | 1.464  | 0.65594 |
| XP_022013560.1 | XP_022034230.1 | 0.9923 | 1.5127 | 0.65598 |
| XP_021973854.1 | XP_021989734.1 | 1.248  | 1.9018 | 0.65622 |
| XP_022006927.1 | XP_022010291.1 | 0.9819 | 1.4962 | 0.65626 |
| XP_022006927.1 | XP_022014870.1 | 1.1742 | 1.7879 | 0.65675 |
| XP_021981407.1 | XP_022010291.1 | 0.9636 | 1.4667 | 0.65699 |
| XP_021973011.1 | XP_022029739.1 | 0.9704 | 1.4769 | 0.65705 |
| XP_021976022.1 | XP_021993620.1 | 1.4877 | 2.2642 | 0.65705 |
| XP_021988229.1 | XP_022039085.1 | 0.8734 | 1.3291 | 0.65714 |
| XP_022000224.2 | XP_022002420.1 | 0.8413 | 1.2801 | 0.65721 |
| XP_021976022.1 | XP_021995116.1 | 1.3955 | 2.1233 | 0.65723 |
| XP_021987458.1 | XP_022035552.1 | 1.3218 | 2.0111 | 0.65725 |
| XP_021989734.1 | XP_022026964.1 | 1.0782 | 1.6401 | 0.6574  |
| XP_022013183.1 | XP_022018622.1 | 1.5117 | 2.2995 | 0.6574  |
| XP_022002415.1 | XP_022010291.1 | 0.5653 | 0.8597 | 0.65755 |
| XP_022008275.1 | XP_022026963.1 | 1.0167 | 1.5461 | 0.65759 |
| XP_022010616.1 | XP_022034230.1 | 0.8987 | 1.3665 | 0.65767 |
| XP_022008276.2 | XP_022029622.1 | 1.4212 | 2.1601 | 0.65793 |
| XP_022013560.1 | XP_022018622.1 | 1.1563 | 1.7572 | 0.65804 |
| XP_021985239.1 | XP_021995116.1 | 1.335  | 2.0285 | 0.65812 |
| XP_021981626.1 | XP_021992525.1 | 1.3508 | 2.0525 | 0.65812 |
| XP_021993222.1 | XP_022014870.1 | 1.581  | 2.4009 | 0.6585  |
| XP_021981626.1 | XP_022001254.1 | 1.2678 | 1.9252 | 0.65853 |
| XP_022004455.1 | XP_022022487.2 | 0.986  | 1.4971 | 0.65861 |
| XP_021972810.1 | XP_022022487.2 | 1.0334 | 1.5689 | 0.65868 |
| XP_022002415.1 | XP_022008276.2 | 1.0894 | 1.6537 | 0.65877 |
| XP_021995116.1 | XP_022014870.1 | 1.5159 | 2.301  | 0.6588  |
| XP_021988953.1 | XP_021989736.1 | 1.1564 | 1.7552 | 0.65884 |
| XP_022008276.2 | XP_022014870.1 | 1.2863 | 1.952  | 0.65897 |
| XP_022002415.1 | XP_022004980.1 | 1.2153 | 1.8442 | 0.65898 |
| XP_021987457.1 | XP_022035552.1 | 1.3086 | 1.985  | 0.65924 |
| XP_021986500.1 | XP_022004979.1 | 1.1691 | 1.7732 | 0.65932 |
| XP_022002415.1 | XP_022006926.1 | 0.8649 | 1.3118 | 0.65932 |
| XP_022000196.1 | XP_022002419.1 | 1.1765 | 1.7839 | 0.65951 |
| XP_021973316.1 | XP_035842399.1 | 1.5546 | 2.3567 | 0.65965 |
| XP_021993351.1 | XP_022035552.1 | 1.6794 | 2.5451 | 0.65986 |
| XP_021973854.1 | XP_022037775.1 | 1.4679 | 2.2244 | 0.65991 |
| XP_021987458.1 | XP_022029738.1 | 1.294  | 1.9608 | 0.65993 |
| XP_021985239.1 | XP_021992525.1 | 1.1758 | 1.7811 | 0.66015 |
| XP_021984981.2 | XP_022034230.1 | 1.0805 | 1.6361 | 0.66041 |
| XP_021993220.1 | XP_022010294.1 | 1.1311 | 1.7125 | 0.6605  |
| XP_021988953.1 | XP_022002418.1 | 1.0367 | 1.5695 | 0.66053 |
| XP_021976022.1 | XP_021981388.1 | 1.1085 | 1.6769 | 0.66104 |
| XP_022004455.1 | XP_035842399.1 | 1.0053 | 1.5207 | 0.66108 |
| XP_021987458.1 | XP_022000196.1 | 1.4606 | 2.2091 | 0.66117 |
| XP_021993221.1 | XP_022029622.1 | 1.3381 | 2.0224 | 0.66164 |
| XP_021968895.1 | XP_022039074.2 | 0.8147 | 1.2313 | 0.66166 |
| XP_021989737.1 | XP_022002418.1 | 0.9491 | 1.4337 | 0.66199 |
| XP_021981395.1 | XP_022005608.1 | 1.1444 | 1.7285 | 0.66208 |
| XP_021989733.1 | XP_022008276.2 | 1.2729 | 1.9222 | 0.66221 |
| XP_021995117.1 | XP_022021912.1 | 1.2024 | 1.8153 | 0.66237 |
| XP_021986500.1 | XP_022010616.1 | 0.7536 | 1.1377 | 0.66239 |
| XP_021993052.1 | XP_022002419.1 | 0.8487 | 1.281  | 0.66253 |
| XP_021987458.1 | XP_022035551.1 | 1.3384 | 2.02   | 0.66257 |
| XP_022002420.1 | XP_022010292.1 | 0.5481 | 0.8271 | 0.66268 |
| XP_021976022.1 | XP_022013560.1 | 1.1244 | 1.6966 | 0.66274 |
| XP_022002418.1 | XP_022006926.1 | 0.8375 | 1.2636 | 0.66279 |
| XP_022000196.1 | XP_022029622.1 | 1.352  | 2.0396 | 0.66288 |
| XP_021993620.1 | XP_022002421.1 | 0.9731 | 1.4673 | 0.66319 |
| XP_022006327.1 | XP_022029622.1 | 1.4948 | 2.2532 | 0.66341 |
| XP_021972810.1 | XP_021973011.1 | 1.1217 | 1.6905 | 0.66353 |
| XP_022006327.1 | XP_022033162.1 | 1.3525 | 2.0374 | 0.66384 |
| XP_022002420.1 | XP_022013558.1 | 0.5362 | 0.8077 | 0.66386 |
| XP_021973011.1 | XP_022001254.1 | 1.1543 | 1.7384 | 0.664   |
| XP_022002418.1 | XP_022008276.2 | 1.0659 | 1.6041 | 0.66448 |

|                               |        |        |         |
|-------------------------------|--------|--------|---------|
| XP_021987458.1 XP_022021911.1 | 1.1882 | 1.7879 | 0.66458 |
| XP_022026964.1 XP_035835830.1 | 1.1873 | 1.7859 | 0.66482 |
| XP_021993283.1 XP_022029622.1 | 1.224  | 1.8411 | 0.66482 |
| XP_022013239.1 XP_035833070.1 | 1.4119 | 2.1233 | 0.66496 |
| XP_021993551.1 XP_022002421.1 | 1.1256 | 1.6923 | 0.66513 |
| XP_022002416.1 XP_022014870.1 | 1.0046 | 1.5103 | 0.66517 |
| XP_022026963.1 XP_035838717.1 | 1.4179 | 2.131  | 0.66537 |
| XP_022010292.1 XP_022013560.1 | 0.3215 | 0.483  | 0.66563 |
| XP_021993621.2 XP_022021912.1 | 1.2719 | 1.9102 | 0.66585 |
| XP_021987457.1 XP_022002420.1 | 1.175  | 1.7643 | 0.66599 |
| XP_021987458.1 XP_022010291.1 | 1.1788 | 1.7696 | 0.66614 |
| XP_022010616.1 XP_022029738.1 | 0.9237 | 1.3865 | 0.66621 |
| XP_021988229.1 XP_022002417.1 | 0.8332 | 1.2498 | 0.66667 |
| XP_021993220.1 XP_022010296.1 | 1.0568 | 1.5851 | 0.66671 |
| XP_021973316.1 XP_022002415.1 | 1.0737 | 1.6102 | 0.66681 |
| XP_021989736.1 XP_022002421.1 | 0.9608 | 1.4406 | 0.66694 |
| XP_021993283.1 XP_022008275.1 | 1.3579 | 2.0359 | 0.66698 |
| XP_021989735.1 XP_022014870.1 | 0.9444 | 1.4153 | 0.66728 |
| XP_022010291.1 XP_022018622.1 | 1.3438 | 2.0132 | 0.66749 |
| XP_021989737.1 XP_022013560.1 | 0.9898 | 1.4824 | 0.6677  |
| XP_021988953.1 XP_021989734.1 | 0.9668 | 1.4475 | 0.66791 |
| XP_022002416.1 XP_022010919.1 | 0.9424 | 1.4103 | 0.66823 |
| XP_021992525.1 XP_022037775.1 | 1.2392 | 1.8544 | 0.66825 |
| XP_021989736.1 XP_022035552.1 | 0.9459 | 1.4153 | 0.66834 |
| XP_022013182.1 XP_022029738.1 | 1.302  | 1.9472 | 0.66865 |
| XP_021984981.2 XP_022002421.1 | 1.2478 | 1.8654 | 0.66892 |
| XP_021993052.1 XP_022010291.1 | 1.014  | 1.5155 | 0.66909 |
| XP_022010296.1 XP_022022487.2 | 0.8499 | 1.2695 | 0.66948 |
| XP_021985239.1 XP_022000224.2 | 1.1035 | 1.6479 | 0.66964 |
| XP_021973855.1 XP_021988953.1 | 1.8878 | 2.8186 | 0.66977 |
| XP_022039074.2 XP_035833070.1 | 1.2177 | 1.8177 | 0.66991 |
| XP_022002416.1 XP_022008276.2 | 1.1043 | 1.6479 | 0.67013 |
| XP_021981407.1 XP_022026964.1 | 1.0755 | 1.6044 | 0.67034 |
| XP_021972810.1 XP_022039074.2 | 0.7736 | 1.1538 | 0.67048 |
| XP_022008276.2 XP_035842399.1 | 1.6062 | 2.3954 | 0.67054 |
| XP_021981626.1 XP_021989737.1 | 1.2059 | 1.7984 | 0.67054 |
| XP_021992525.1 XP_022013239.1 | 1.5207 | 2.2676 | 0.67062 |
| XP_021987458.1 XP_022002420.1 | 1.1924 | 1.7778 | 0.67072 |
| XP_022006926.1 XP_022010292.1 | 0.8767 | 1.3071 | 0.67072 |
| XP_021978807.1 XP_022039085.1 | 1.0628 | 1.5844 | 0.67079 |
| XP_021993622.1 XP_022006926.1 | 1.7801 | 2.6534 | 0.67088 |
| XP_021973855.1 XP_022004980.1 | 1.6167 | 2.4096 | 0.67094 |
| XP_021973011.1 XP_022006327.1 | 1.2327 | 1.8368 | 0.67111 |
| XP_021968895.1 XP_022013183.1 | 1.2266 | 1.8277 | 0.67112 |
| XP_021989737.1 XP_022002420.1 | 0.9275 | 1.3816 | 0.67132 |
| XP_021995117.1 XP_022022487.2 | 1.4404 | 2.1445 | 0.67167 |
| XP_022004980.1 XP_022029740.1 | 1.0587 | 1.5758 | 0.67185 |
| XP_021993220.1 XP_022002415.1 | 0.9605 | 1.4293 | 0.67201 |
| XP_021976022.1 XP_021981395.1 | 1.0515 | 1.5639 | 0.67236 |
| XP_022000224.2 XP_022029739.1 | 0.9619 | 1.4304 | 0.67247 |
| XP_021987457.1 XP_022013183.1 | 1.184  | 1.7605 | 0.67254 |
| XP_022029738.1 XP_035835830.1 | 0.6336 | 0.9421 | 0.67254 |
| XP_021976022.1 XP_021989736.1 | 1.1337 | 1.6847 | 0.67294 |
| XP_021993220.1 XP_022000224.2 | 1.5916 | 2.3646 | 0.67309 |
| XP_022004980.1 XP_022022835.1 | 1.653  | 2.455  | 0.67332 |
| XP_021993222.1 XP_022026963.1 | 1.384  | 2.0553 | 0.67338 |
| XP_021968895.1 XP_021972810.1 | 0.8637 | 1.2821 | 0.67366 |
| XP_021973316.1 XP_022002418.1 | 1.0734 | 1.5933 | 0.6737  |
| XP_021993052.1 XP_021993220.1 | 1.1466 | 1.7019 | 0.67372 |
| XP_022010296.1 XP_022013183.1 | 1.2608 | 1.871  | 0.67386 |
| XP_022002418.1 XP_022010291.1 | 0.5844 | 0.8672 | 0.67389 |
| XP_021993620.1 XP_022002417.1 | 0.9417 | 1.3973 | 0.67394 |
| XP_022010295.2 XP_022010919.1 | 0.968  | 1.4362 | 0.674   |
| XP_021995117.1 XP_022021911.1 | 1.1283 | 1.674  | 0.67401 |
| XP_021995117.1 XP_022021913.1 | 1.1283 | 1.674  | 0.67401 |
| XP_021995117.1 XP_022021914.1 | 1.1283 | 1.674  | 0.67401 |
| XP_021973316.1 XP_022009213.1 | 1.2458 | 1.8476 | 0.67428 |
| XP_021973011.1 XP_022015084.1 | 1.2334 | 1.8292 | 0.67428 |
| XP_021993221.1 XP_022002421.1 | 1.0616 | 1.5743 | 0.67433 |
| XP_021993621.2 XP_022029738.1 | 1.0647 | 1.5788 | 0.67437 |
| XP_022002415.1 XP_022006327.1 | 1.1588 | 1.7174 | 0.67474 |
| XP_021993052.1 XP_022029739.1 | 0.8447 | 1.2513 | 0.67506 |
| XP_021993283.1 XP_022021913.1 | 1.598  | 2.3668 | 0.67517 |
| XP_021993283.1 XP_022021914.1 | 1.598  | 2.3668 | 0.67517 |
| XP_022013558.1 XP_022035384.1 | 0.9829 | 1.4551 | 0.67549 |
| XP_021981395.1 XP_021981626.1 | 1.1359 | 1.6814 | 0.67557 |
| XP_022002418.1 XP_022033162.1 | 0.6894 | 1.0201 | 0.67582 |
| XP_021973316.1 XP_022026963.1 | 1.4143 | 2.0927 | 0.67583 |
| XP_021985239.1 XP_022008275.1 | 1.2965 | 1.9179 | 0.676   |
| XP_021985239.1 XP_021989734.1 | 1.0593 | 1.5668 | 0.67609 |
| XP_022010292.1 XP_035833070.1 | 1.4729 | 2.1784 | 0.67614 |
| XP_022004980.1 XP_022010294.1 | 1.0777 | 1.5937 | 0.67623 |
| XP_021989737.1 XP_035842399.1 | 1.355  | 2.0036 | 0.67628 |
| XP_021995117.1 XP_022001254.1 | 1.1664 | 1.7246 | 0.67633 |
| XP_021993551.1 XP_022035551.1 | 1.7018 | 2.5153 | 0.67658 |
| XP_022006327.1 XP_035838717.1 | 1.3607 | 2.0111 | 0.67659 |
| XP_021993620.1 XP_022002418.1 | 0.9176 | 1.3561 | 0.67665 |
| XP_021981407.1 XP_035835830.1 | 0.9233 | 1.3645 | 0.67666 |

|                               |        |        |         |
|-------------------------------|--------|--------|---------|
| XP_021972810.1 XP_022013239.1 | 1.2065 | 1.7829 | 0.67671 |
| XP_021989733.1 XP_022008275.1 | 1.0923 | 1.6141 | 0.67672 |
| XP_021995117.1 XP_022002416.1 | 0.8429 | 1.2446 | 0.67725 |
| XP_022004979.1 XP_022006668.1 | 1.0681 | 1.5767 | 0.67743 |
| XP_022002418.1 XP_022014870.1 | 1.0274 | 1.5166 | 0.67744 |
| XP_021988229.1 XP_022002418.1 | 0.8216 | 1.2126 | 0.67755 |
| XP_021988953.1 XP_022013560.1 | 1.0805 | 1.5939 | 0.6779  |
| XP_022010291.1 XP_022010295.2 | 0.6276 | 0.9258 | 0.6779  |
| XP_021995117.1 XP_022002417.1 | 0.8334 | 1.2292 | 0.678   |
| XP_021981395.1 XP_022002421.1 | 1.042  | 1.5368 | 0.67803 |
| XP_021973316.1 XP_022008276.2 | 1.8276 | 2.6954 | 0.67804 |
| XP_021981626.1 XP_021993052.1 | 1.2195 | 1.7984 | 0.6781  |
| XP_021972810.1 XP_021993620.1 | 1.0973 | 1.6177 | 0.67831 |
| XP_021978842.1 XP_022002420.1 | 1.0818 | 1.5948 | 0.67833 |
| XP_022021912.1 XP_035838717.1 | 1.1394 | 1.6797 | 0.67834 |
| XP_022002416.1 XP_035835830.1 | 0.4917 | 0.7248 | 0.67839 |
| XP_021993622.1 XP_022013182.1 | 1.5049 | 2.2179 | 0.67852 |
| XP_021987458.1 XP_021988229.1 | 1.0433 | 1.5376 | 0.67852 |
| XP_021984981.2 XP_022021911.1 | 1.1973 | 1.7642 | 0.67866 |
| XP_021986500.1 XP_022013239.1 | 1.1652 | 1.7168 | 0.6787  |
| XP_021995117.1 XP_022014870.1 | 1.1185 | 1.6479 | 0.67874 |
| XP_022008276.2 XP_022010919.1 | 1.1546 | 1.7009 | 0.67882 |
| XP_021987457.1 XP_022008276.2 | 1.286  | 1.8943 | 0.67888 |
| XP_021989737.1 XP_022029740.1 | 1.074  | 1.5819 | 0.67893 |
| XP_021993222.1 XP_022006927.1 | 1.5356 | 2.2614 | 0.67905 |
| XP_021988229.1 XP_022029739.1 | 0.833  | 1.2265 | 0.67917 |
| XP_022001254.1 XP_022029740.1 | 1.014  | 1.4925 | 0.6794  |
| XP_021989733.1 XP_022006668.1 | 1.2411 | 1.8265 | 0.6795  |
| XP_021993221.1 XP_022039085.1 | 1.4474 | 2.1293 | 0.67975 |
| XP_022026963.1 XP_022039074.2 | 1.2439 | 1.8294 | 0.67995 |
| XP_022029740.1 XP_035838717.1 | 1.0633 | 1.5636 | 0.68003 |
| XP_021989737.1 XP_022014870.1 | 0.8981 | 1.3205 | 0.68012 |
| XP_021989734.1 XP_021995116.1 | 1.2294 | 1.807  | 0.68035 |
| XP_022002418.1 XP_022022487.2 | 0.924  | 1.3578 | 0.68051 |
| XP_022006927.1 XP_022039074.2 | 1.1664 | 1.7137 | 0.68063 |
| XP_021993622.1 XP_021995117.1 | 1.1262 | 1.6546 | 0.68065 |
| XP_022002417.1 XP_022039085.1 | 0.7242 | 1.0639 | 0.6807  |
| XP_021981388.1 XP_021984766.1 | 0.9063 | 1.3308 | 0.68102 |
| XP_022001254.1 XP_022002419.1 | 1.1019 | 1.6173 | 0.68132 |
| XP_022014870.1 XP_022022835.1 | 1.4743 | 2.1634 | 0.68147 |
| XP_022010296.1 XP_022013560.1 | 0.35   | 0.5135 | 0.6816  |
| XP_022004455.1 XP_022013558.1 | 0.6147 | 0.9015 | 0.68186 |
| XP_021989736.1 XP_022035551.1 | 0.9471 | 1.3888 | 0.68196 |
| XP_022010919.1 XP_035835830.1 | 1.0185 | 1.4931 | 0.68214 |
| XP_021987458.1 XP_022010294.1 | 1.0293 | 1.5088 | 0.6822  |
| XP_021981626.1 XP_022013558.1 | 1.0512 | 1.5406 | 0.68233 |
| XP_021993622.1 XP_022002415.1 | 1.107  | 1.6222 | 0.68241 |
| XP_021993052.1 XP_022000196.1 | 1.1591 | 1.6984 | 0.68247 |
| XP_021993052.1 XP_022002421.1 | 0.8731 | 1.2789 | 0.6827  |
| XP_021988229.1 XP_021988953.1 | 1.3549 | 1.9843 | 0.68281 |
| XP_022002418.1 XP_022013558.1 | 0.5149 | 0.754  | 0.68289 |
| XP_021989733.1 XP_022010295.2 | 1.1759 | 1.7216 | 0.68303 |
| XP_022029739.1 XP_022034230.1 | 1.1422 | 1.6722 | 0.68305 |
| XP_022002420.1 XP_022034230.1 | 1.0065 | 1.4735 | 0.68307 |
| XP_021968895.1 XP_021973011.1 | 1.0592 | 1.5503 | 0.68322 |
| XP_021972810.1 XP_022022835.1 | 1.1827 | 1.731  | 0.68325 |
| XP_021987457.1 XP_022002416.1 | 1.1137 | 1.63   | 0.68325 |
| XP_021987457.1 XP_022002419.1 | 1.048  | 1.5336 | 0.68336 |
| XP_022002421.1 XP_022022487.2 | 0.9571 | 1.4005 | 0.6834  |
| XP_021973316.1 XP_022010296.1 | 1.0947 | 1.601  | 0.68376 |
| XP_021993052.1 XP_035833070.1 | 1.2999 | 1.901  | 0.6838  |
| XP_021968895.1 XP_022001254.1 | 1.0622 | 1.5532 | 0.68388 |
| XP_035833070.1 XP_035842399.1 | 1.5584 | 2.2785 | 0.68396 |
| XP_022000224.2 XP_022039074.2 | 0.8823 | 1.2896 | 0.68417 |
| XP_022006668.1 XP_022010294.1 | 0.9885 | 1.4448 | 0.68418 |
| XP_021968895.1 XP_022013560.1 | 0.9476 | 1.385  | 0.68419 |
| XP_021989735.1 XP_022026963.1 | 1.596  | 2.3318 | 0.68445 |
| XP_021989733.1 XP_021995116.1 | 1.2283 | 1.7942 | 0.68459 |
| XP_021968895.1 XP_022010919.1 | 1.1783 | 1.7211 | 0.68462 |
| XP_022001254.1 XP_022002415.1 | 0.9846 | 1.4381 | 0.68465 |
| XP_022010616.1 XP_022039085.1 | 0.9372 | 1.3687 | 0.68474 |
| XP_021984766.1 XP_021989734.1 | 0.9937 | 1.4503 | 0.68517 |
| XP_022009213.1 XP_022010292.1 | 0.98   | 1.4301 | 0.68527 |
| XP_021976022.1 XP_022002416.1 | 1.1995 | 1.7502 | 0.68535 |
| XP_021984766.1 XP_022002415.1 | 1.0759 | 1.5696 | 0.68546 |
| XP_022009213.1 XP_022033162.1 | 1.2499 | 1.8226 | 0.68578 |
| XP_021976022.1 XP_022002419.1 | 1.1632 | 1.6957 | 0.68597 |
| XP_021993052.1 XP_022004979.1 | 1.1096 | 1.6167 | 0.68634 |
| XP_021984766.1 XP_022002418.1 | 1.1214 | 1.6336 | 0.68646 |
| XP_021981626.1 XP_021988953.1 | 1.1204 | 1.6321 | 0.68648 |
| XP_022009213.1 XP_022026963.1 | 1.3492 | 1.9649 | 0.68665 |
| XP_021973011.1 XP_022005608.1 | 0.9447 | 1.3751 | 0.687   |
| XP_022000196.1 XP_022006668.1 | 1.4121 | 2.0553 | 0.68705 |
| XP_021976022.1 XP_022010616.1 | 1.5743 | 2.2913 | 0.68708 |
| XP_022002417.1 XP_022021912.1 | 1.1132 | 1.6201 | 0.68712 |
| XP_022001254.1 XP_022013560.1 | 1.1447 | 1.6658 | 0.68718 |
| XP_022001254.1 XP_022009213.1 | 1.3682 | 1.9908 | 0.68726 |
| XP_021981388.1 XP_022002421.1 | 1.0672 | 1.5526 | 0.68736 |

|                               |        |        |         |
|-------------------------------|--------|--------|---------|
| XP_021987457.1 XP_022035551.1 | 1.3072 | 1.9016 | 0.68742 |
| XP_022002415.1 XP_022002420.1 | 0.1476 | 0.2147 | 0.68747 |
| XP_022010292.1 XP_022013182.1 | 1.3033 | 1.8953 | 0.68765 |
| XP_022021911.1 XP_022029739.1 | 1.0577 | 1.5376 | 0.68789 |
| XP_022000196.1 XP_022006327.1 | 1.1436 | 1.6623 | 0.68796 |
| XP_022002420.1 XP_022010296.1 | 0.5735 | 0.8336 | 0.68798 |
| XP_022010295.2 XP_022010296.1 | 0.1149 | 0.167  | 0.68802 |
| XP_022002415.1 XP_022022487.2 | 0.9162 | 1.3316 | 0.68804 |
| XP_021993620.1 XP_021993621.2 | 0.1758 | 0.2555 | 0.68806 |
| XP_021984766.1 XP_022022487.2 | 1.337  | 1.9431 | 0.68808 |
| XP_022002416.1 XP_022006327.1 | 1.1587 | 1.6839 | 0.6881  |
| XP_022002418.1 XP_022010919.1 | 0.9756 | 1.4178 | 0.68811 |
| XP_021989737.1 XP_022018622.1 | 1.25   | 1.8163 | 0.68821 |
| XP_021987458.1 XP_022002416.1 | 1.1303 | 1.6419 | 0.68841 |
| XP_021989734.1 XP_022010295.2 | 1.1046 | 1.6045 | 0.68844 |
| XP_021968895.1 XP_021988229.1 | 0.8224 | 1.1941 | 0.68872 |
| XP_021973011.1 XP_021978807.1 | 1.0907 | 1.5836 | 0.68875 |
| XP_021987458.1 XP_022002419.1 | 1.0636 | 1.5441 | 0.68882 |
| XP_022002421.1 XP_022004980.1 | 1.2643 | 1.8349 | 0.68903 |
| XP_022002415.1 XP_022021911.1 | 1.0875 | 1.5773 | 0.68947 |
| XP_022002415.1 XP_022021913.1 | 1.0875 | 1.5773 | 0.68947 |
| XP_022002415.1 XP_022021914.1 | 1.0875 | 1.5773 | 0.68947 |
| XP_022006926.1 XP_022022835.1 | 1.3244 | 1.9197 | 0.6899  |
| XP_021984766.1 XP_022013239.1 | 1.5442 | 2.2374 | 0.69018 |
| XP_021981407.1 XP_021993551.1 | 1.4759 | 2.1381 | 0.69029 |
| XP_022010294.1 XP_035838717.1 | 1.0218 | 1.4793 | 0.69073 |
| XP_021968895.1 XP_021978842.1 | 1.3535 | 1.9584 | 0.69113 |
| XP_021993052.1 XP_022026964.1 | 1.3888 | 2.009  | 0.69129 |
| XP_021993052.1 XP_022004455.1 | 1.0603 | 1.5336 | 0.69138 |
| XP_021987457.1 XP_022022487.2 | 1.592  | 2.3026 | 0.69139 |
| XP_021986500.1 XP_022010296.1 | 0.8532 | 1.2339 | 0.69147 |
| XP_022002415.1 XP_022013558.1 | 0.4972 | 0.7189 | 0.69161 |
| XP_021989733.1 XP_022001254.1 | 1.1499 | 1.6626 | 0.69163 |
| XP_022010919.1 XP_022015084.1 | 1.3954 | 2.0175 | 0.69165 |
| XP_022010291.1 XP_022039074.2 | 0.7614 | 1.1001 | 0.69212 |
| XP_021987457.1 XP_022039085.1 | 1.1545 | 1.668  | 0.69215 |
| XP_021981407.1 XP_022008275.1 | 1.0251 | 1.481  | 0.69217 |
| XP_022006926.1 XP_022039074.2 | 0.9999 | 1.4444 | 0.69226 |
| XP_021986500.1 XP_021989736.1 | 0.9183 | 1.3263 | 0.69238 |
| XP_021968895.1 XP_022021911.1 | 1.3933 | 2.012  | 0.6925  |
| XP_021968895.1 XP_022021913.1 | 1.3933 | 2.012  | 0.6925  |
| XP_021968895.1 XP_022021914.1 | 1.3933 | 2.012  | 0.6925  |
| XP_022029622.1 XP_022035384.1 | 1.547  | 2.2307 | 0.6935  |
| XP_021973854.1 XP_021993620.1 | 2.2025 | 3.1756 | 0.69357 |
| XP_021978842.1 XP_022034230.1 | 1.3743 | 1.9807 | 0.69385 |
| XP_021989736.1 XP_022006327.1 | 1.3545 | 1.952  | 0.6939  |
| XP_021995117.1 XP_022004980.1 | 1.0876 | 1.5672 | 0.69398 |
| XP_021973854.1 XP_021978842.1 | 1.4183 | 2.0425 | 0.69439 |
| XP_022000196.1 XP_022021913.1 | 1.3708 | 1.9737 | 0.69453 |
| XP_021989736.1 XP_021993052.1 | 1.132  | 1.6279 | 0.69537 |
| XP_022002415.1 XP_022021912.1 | 1.0841 | 1.5586 | 0.69556 |
| XP_022000196.1 XP_022021911.1 | 1.2472 | 1.7921 | 0.69594 |
| XP_021999258.1 XP_022026963.1 | 1.5895 | 2.2834 | 0.69611 |
| XP_022014870.1 XP_022029739.1 | 1.0127 | 1.454  | 0.69649 |
| XP_022004980.1 XP_022013182.1 | 1.211  | 1.7373 | 0.69706 |
| XP_021987458.1 XP_022013182.1 | 1.143  | 1.6397 | 0.69708 |
| XP_021978842.1 XP_021993052.1 | 1.3125 | 1.8826 | 0.69717 |
| XP_021984766.1 XP_022001254.1 | 1.2713 | 1.8232 | 0.69729 |
| XP_022000224.2 XP_022004980.1 | 1.1047 | 1.5832 | 0.69776 |
| XP_022002417.1 XP_022010295.2 | 0.5539 | 0.7938 | 0.69778 |
| XP_022010291.1 XP_035835830.1 | 0.6005 | 0.8605 | 0.69785 |
| XP_021985239.1 XP_022010292.1 | 0.8349 | 1.1962 | 0.69796 |
| XP_022013560.1 XP_022029740.1 | 0.6329 | 0.9067 | 0.69803 |
| XP_021986500.1 XP_021989735.1 | 0.9798 | 1.4033 | 0.69821 |
| XP_022006926.1 XP_022010291.1 | 0.8751 | 1.2532 | 0.69829 |
| XP_021984766.1 XP_021993551.1 | 1.6337 | 2.3391 | 0.69843 |
| XP_022002417.1 XP_022006327.1 | 1.2506 | 1.7904 | 0.6985  |
| XP_021987458.1 XP_022039085.1 | 1.1582 | 1.6578 | 0.69864 |
| XP_021981395.1 XP_021999258.1 | 1.3216 | 1.8916 | 0.69867 |
| XP_021984766.1 XP_022013560.1 | 0.89   | 1.2737 | 0.69875 |
| XP_021988229.1 XP_022013560.1 | 0.861  | 1.2316 | 0.69909 |
| XP_021993220.1 XP_022014870.1 | 1.4603 | 2.0888 | 0.69911 |
| XP_021981395.1 XP_022029738.1 | 1.196  | 1.7106 | 0.69917 |
| XP_022002418.1 XP_022021911.1 | 1.0822 | 1.5478 | 0.69919 |
| XP_022002418.1 XP_022021913.1 | 1.0822 | 1.5478 | 0.69919 |
| XP_022002418.1 XP_022021914.1 | 1.0822 | 1.5478 | 0.69919 |
| XP_021993222.1 XP_021993620.1 | 0.8631 | 1.2339 | 0.69949 |
| XP_021981388.1 XP_022010291.1 | 0.9635 | 1.3764 | 0.70001 |
| XP_022015084.1 XP_022018622.1 | 1.01   | 1.4428 | 0.70003 |
| XP_021999258.1 XP_022010296.1 | 1.0325 | 1.4747 | 0.70014 |
| XP_022006927.1 XP_022029740.1 | 0.9597 | 1.3704 | 0.70031 |
| XP_021995116.1 XP_022018622.1 | 1.5483 | 2.2102 | 0.70052 |
| XP_021978842.1 XP_022002415.1 | 1.0856 | 1.5491 | 0.70079 |
| XP_021984981.2 XP_035833070.1 | 1.4779 | 2.1082 | 0.70102 |
| XP_022004979.1 XP_022035551.1 | 1.4217 | 2.0276 | 0.70117 |
| XP_022004979.1 XP_022035552.1 | 1.4217 | 2.0276 | 0.70117 |
| XP_022006927.1 XP_022008275.1 | 1.1748 | 1.6747 | 0.7015  |
| XP_021973854.1 XP_021989733.1 | 1.2812 | 1.8262 | 0.70157 |

|                |                |        |        |         |
|----------------|----------------|--------|--------|---------|
| XP_022022835.1 | XP_022035552.1 | 1.3818 | 1.9694 | 0.70164 |
| XP_022021912.1 | XP_022022835.1 | 1.4308 | 2.0387 | 0.70182 |
| XP_021985239.1 | XP_035842399.1 | 1.2484 | 1.7787 | 0.70186 |
| XP_022010291.1 | XP_022013182.1 | 1.3515 | 1.9254 | 0.70193 |
| XP_021978842.1 | XP_022004455.1 | 1.1237 | 1.6003 | 0.70218 |
| XP_021993620.1 | XP_022005608.1 | 1.3103 | 1.8659 | 0.70223 |
| XP_021984981.2 | XP_022021913.1 | 1.2061 | 1.7172 | 0.70236 |
| XP_021984981.2 | XP_022021914.1 | 1.2061 | 1.7172 | 0.70236 |
| XP_022010295.2 | XP_022029740.1 | 0.72   | 1.0247 | 0.70264 |
| XP_021995116.1 | XP_022029622.1 | 1.5675 | 2.2303 | 0.70282 |
| XP_022002416.1 | XP_022010295.2 | 0.5446 | 0.7748 | 0.70289 |
| XP_022004455.1 | XP_022010919.1 | 1.0314 | 1.4668 | 0.70316 |
| XP_021968895.1 | XP_022013558.1 | 0.8859 | 1.2595 | 0.70337 |
| XP_022022835.1 | XP_022039085.1 | 1.2672 | 1.8002 | 0.70392 |
| XP_021987457.1 | XP_022006327.1 | 1.4316 | 2.0335 | 0.70401 |
| XP_021993052.1 | XP_021995117.1 | 0.9529 | 1.3535 | 0.70403 |
| XP_022002418.1 | XP_022021912.1 | 1.0789 | 1.5315 | 0.70447 |
| XP_021973854.1 | XP_022010919.1 | 1.3346 | 1.8938 | 0.70472 |
| XP_021993551.1 | XP_035838717.1 | 1.4144 | 2.007  | 0.70473 |
| XP_021993222.1 | XP_035842399.1 | 1.8655 | 2.647  | 0.70476 |
| XP_022009213.1 | XP_022010919.1 | 1.046  | 1.4839 | 0.7049  |
| XP_021968895.1 | XP_022033162.1 | 0.8961 | 1.2712 | 0.70492 |
| XP_022026964.1 | XP_022029738.1 | 1.0815 | 1.5339 | 0.70507 |
| XP_021969020.1 | XP_022004979.1 | 1.6054 | 2.2757 | 0.70545 |
| XP_021981626.1 | XP_021993283.1 | 1.3049 | 1.8496 | 0.7055  |
| XP_022022835.1 | XP_022029622.1 | 1.3258 | 1.879  | 0.70559 |
| XP_022004455.1 | XP_022010616.1 | 0.9545 | 1.3525 | 0.70573 |
| XP_021973316.1 | XP_022039085.1 | 1.3577 | 1.9237 | 0.70578 |
| XP_021978807.1 | XP_021992525.1 | 1.1959 | 1.6944 | 0.7058  |
| XP_021993620.1 | XP_022039074.2 | 1.1224 | 1.5898 | 0.706   |
| XP_021988229.1 | XP_022026963.1 | 1.2103 | 1.7141 | 0.70608 |
| XP_022006327.1 | XP_022009213.1 | 1.3976 | 1.9793 | 0.70611 |
| XP_021993620.1 | XP_035835830.1 | 1.2376 | 1.7527 | 0.70611 |
| XP_022010295.2 | XP_022022487.2 | 0.8507 | 1.2046 | 0.70621 |
| XP_021992525.1 | XP_022013560.1 | 1.273  | 1.8025 | 0.70624 |
| XP_021993283.1 | XP_022021911.1 | 1.559  | 2.2064 | 0.70658 |
| XP_022001254.1 | XP_022006327.1 | 1.2586 | 1.7806 | 0.70684 |
| XP_022009213.1 | XP_022029738.1 | 1.2236 | 1.7309 | 0.70692 |
| XP_021993052.1 | XP_022006927.1 | 1.0074 | 1.4249 | 0.707   |
| XP_021973854.1 | XP_035835830.1 | 1.2184 | 1.7232 | 0.70706 |
| XP_021986500.1 | XP_022010291.1 | 1.1098 | 1.5695 | 0.7071  |
| XP_021985239.1 | XP_022010296.1 | 0.8771 | 1.2404 | 0.70711 |
| XP_021995117.1 | XP_022002415.1 | 0.8221 | 1.1619 | 0.70755 |
| XP_021984766.1 | XP_022010294.1 | 0.9901 | 1.3993 | 0.70757 |
| XP_022002421.1 | XP_022021912.1 | 1.1284 | 1.5945 | 0.70768 |
| XP_021993220.1 | XP_022010295.2 | 0.9473 | 1.3384 | 0.70779 |
| XP_022002420.1 | XP_022029740.1 | 0.3986 | 0.5631 | 0.70787 |
| XP_022010295.2 | XP_035838717.1 | 0.949  | 1.3406 | 0.70789 |
| XP_022002416.1 | XP_022021911.1 | 1.111  | 1.5686 | 0.70827 |
| XP_022002416.1 | XP_022021913.1 | 1.111  | 1.5686 | 0.70827 |
| XP_022002416.1 | XP_022021914.1 | 1.111  | 1.5686 | 0.70827 |
| XP_021993222.1 | XP_022021912.1 | 1.6938 | 2.3911 | 0.70838 |
| XP_021972810.1 | XP_022021911.1 | 1.2608 | 1.7795 | 0.70851 |
| XP_021972810.1 | XP_022021913.1 | 1.2608 | 1.7795 | 0.70851 |
| XP_021972810.1 | XP_022021914.1 | 1.2608 | 1.7795 | 0.70851 |
| XP_022002421.1 | XP_022035384.1 | 1.4021 | 1.9789 | 0.70852 |
| XP_022021913.1 | XP_022029739.1 | 1.0704 | 1.5105 | 0.70864 |
| XP_022021914.1 | XP_022029739.1 | 1.0704 | 1.5105 | 0.70864 |
| XP_022013183.1 | XP_022039085.1 | 1.5996 | 2.2564 | 0.70892 |
| XP_021972810.1 | XP_021985239.1 | 0.8939 | 1.2608 | 0.70899 |
| XP_021987457.1 | XP_022010294.1 | 1.0222 | 1.4414 | 0.70917 |
| XP_022010292.1 | XP_022026964.1 | 0.9803 | 1.3822 | 0.70923 |
| XP_021972810.1 | XP_022029738.1 | 0.6308 | 0.8892 | 0.7094  |
| XP_021992525.1 | XP_022018622.1 | 1.4219 | 2.0042 | 0.70946 |
| XP_022013183.1 | XP_022029622.1 | 1.3143 | 1.8522 | 0.70959 |
| XP_021989735.1 | XP_035842399.1 | 1.5018 | 2.1164 | 0.7096  |
| XP_021988953.1 | XP_022000224.2 | 0.9598 | 1.3525 | 0.70965 |
| XP_021993551.1 | XP_022035384.1 | 1.6954 | 2.3879 | 0.71    |
| XP_022000224.2 | XP_022008276.2 | 1.2321 | 1.7352 | 0.71006 |
| XP_021973854.1 | XP_022002419.1 | 1.1254 | 1.5846 | 0.71021 |
| XP_021989737.1 | XP_022013239.1 | 1.4724 | 2.0721 | 0.71058 |
| XP_021969020.1 | XP_021988229.1 | 1.7835 | 2.5088 | 0.7109  |
| XP_021993221.1 | XP_022013558.1 | 1.2026 | 1.6915 | 0.71097 |
| XP_021995116.1 | XP_035833070.1 | 1.2969 | 1.824  | 0.71102 |
| XP_021989734.1 | XP_022010291.1 | 1.036  | 1.4566 | 0.71125 |
| XP_021973316.1 | XP_022002419.1 | 1.0266 | 1.4431 | 0.71139 |
| XP_021978842.1 | XP_021986500.1 | 1.1641 | 1.6363 | 0.71142 |
| XP_021973011.1 | XP_021992525.1 | 1.276  | 1.7932 | 0.71158 |
| XP_021992525.1 | XP_022010291.1 | 1.4328 | 2.0132 | 0.7117  |
| XP_021981626.1 | XP_022002417.1 | 1.0265 | 1.4418 | 0.71196 |
| XP_021973854.1 | XP_021993551.1 | 1.3214 | 1.8555 | 0.71215 |
| XP_022004455.1 | XP_022029738.1 | 0.5043 | 0.708  | 0.71229 |
| XP_021987457.1 | XP_022000196.1 | 1.4776 | 2.0727 | 0.71289 |
| XP_022004980.1 | XP_022013183.1 | 1.175  | 1.6479 | 0.71303 |
| XP_022000224.2 | XP_022001254.1 | 1.3904 | 1.9499 | 0.71306 |
| XP_022002418.1 | XP_022002421.1 | 0.2018 | 0.283  | 0.71307 |
| XP_022018622.1 | XP_022039085.1 | 1.1926 | 1.6716 | 0.71345 |
| XP_021989735.1 | XP_022006668.1 | 1.2316 | 1.7259 | 0.7136  |

|                |                |        |        |         |
|----------------|----------------|--------|--------|---------|
| XP_021987458.1 | XP_022010295.2 | 1.3098 | 1.8351 | 0.71375 |
| XP_021984766.1 | XP_021989737.1 | 1.0353 | 1.4505 | 0.71375 |
| XP_022004980.1 | XP_022006327.1 | 1.5756 | 2.2073 | 0.71381 |
| XP_022009213.1 | XP_022010294.1 | 1.0526 | 1.4743 | 0.71397 |
| XP_021968895.1 | XP_022010294.1 | 0.9346 | 1.3089 | 0.71403 |
| XP_021981395.1 | XP_022026964.1 | 1.1966 | 1.6757 | 0.71409 |
| XP_021988953.1 | XP_022002415.1 | 0.9831 | 1.3767 | 0.7141  |
| XP_021993620.1 | XP_022000196.1 | 1.2894 | 1.8056 | 0.71411 |
| XP_022013183.1 | XP_022013558.1 | 1.1774 | 1.6479 | 0.71449 |
| XP_021973011.1 | XP_021989736.1 | 1.1159 | 1.5615 | 0.71463 |
| XP_021973316.1 | XP_022006926.1 | 1.2735 | 1.7816 | 0.71481 |
| XP_021973854.1 | XP_022010616.1 | 1.3322 | 1.8637 | 0.71481 |
| XP_021984981.2 | XP_022013239.1 | 1.339  | 1.8732 | 0.71482 |
| XP_022002420.1 | XP_022010919.1 | 0.9413 | 1.3168 | 0.71484 |
| XP_021984981.2 | XP_035835830.1 | 1.0093 | 1.4117 | 0.71495 |
| XP_021995117.1 | XP_022009213.1 | 1.0203 | 1.427  | 0.715   |
| XP_021968895.1 | XP_021989737.1 | 1.161  | 1.6236 | 0.71508 |
| XP_021984766.1 | XP_022021913.1 | 1.5692 | 2.1944 | 0.71509 |
| XP_021984766.1 | XP_022021914.1 | 1.5692 | 2.1944 | 0.71509 |
| XP_021992525.1 | XP_022013558.1 | 1.2171 | 1.7015 | 0.71531 |
| XP_021993221.1 | XP_022018622.1 | 1.4042 | 1.963  | 0.71533 |
| XP_022013183.1 | XP_022039074.2 | 1.3693 | 1.9131 | 0.71575 |
| XP_021989734.1 | XP_022000196.1 | 1.0785 | 1.5068 | 0.71576 |
| XP_021981388.1 | XP_022035384.1 | 1.2422 | 1.7355 | 0.71576 |
| XP_021986500.1 | XP_021995116.1 | 0.8696 | 1.2144 | 0.71607 |
| XP_021978807.1 | XP_022013239.1 | 1.2717 | 1.7758 | 0.71613 |
| XP_022002419.1 | XP_022029739.1 | 0.3957 | 0.5525 | 0.7162  |
| XP_021981407.1 | XP_022005608.1 | 1.1029 | 1.5399 | 0.71622 |
| XP_021973011.1 | XP_022029740.1 | 1.0018 | 1.398  | 0.7166  |
| XP_022002419.1 | XP_022006327.1 | 1.3223 | 1.8448 | 0.71677 |
| XP_021973316.1 | XP_021993221.1 | 1.4737 | 2.0548 | 0.7172  |
| XP_022001254.1 | XP_022034230.1 | 1.3998 | 1.951  | 0.71748 |
| XP_022004455.1 | XP_022029739.1 | 0.5128 | 0.7147 | 0.7175  |
| XP_021978807.1 | XP_022014870.1 | 1.0311 | 1.4362 | 0.71794 |
| XP_021985239.1 | XP_022026963.1 | 1.1546 | 1.6076 | 0.71821 |
| XP_021993052.1 | XP_022002417.1 | 0.7808 | 1.0871 | 0.71824 |
| XP_021993283.1 | XP_022004979.1 | 1.0946 | 1.523  | 0.71871 |
| XP_022000196.1 | XP_022021914.1 | 1.2695 | 1.7656 | 0.71902 |
| XP_021972810.1 | XP_022010291.1 | 0.6685 | 0.9291 | 0.71951 |
| XP_021969020.1 | XP_022035384.1 | 1.3995 | 1.9444 | 0.71976 |
| XP_022013182.1 | XP_022013558.1 | 1.2345 | 1.7148 | 0.71991 |
| XP_022004979.1 | XP_022005608.1 | 1.3294 | 1.8464 | 0.72    |
| XP_021987458.1 | XP_022013183.1 | 1.1555 | 1.6042 | 0.7203  |
| XP_021969020.1 | XP_022006927.1 | 1.3111 | 1.8201 | 0.72035 |
| XP_021995116.1 | XP_022029739.1 | 1.235  | 1.7143 | 0.72041 |
| XP_021981407.1 | XP_022006926.1 | 1.3905 | 1.9298 | 0.72054 |
| XP_022006668.1 | XP_022013239.1 | 1.3442 | 1.8653 | 0.72063 |
| XP_021981626.1 | XP_022002416.1 | 1.0217 | 1.4176 | 0.72073 |
| XP_021995116.1 | XP_022029740.1 | 1.2034 | 1.6696 | 0.72077 |
| XP_022013239.1 | XP_022022835.1 | 1.1748 | 1.6299 | 0.72078 |
| XP_021968895.1 | XP_021973316.1 | 1.3185 | 1.8291 | 0.72085 |
| XP_021989734.1 | XP_022006668.1 | 1.2592 | 1.7464 | 0.72103 |
| XP_021981388.1 | XP_021989737.1 | 0.4289 | 0.5946 | 0.72133 |
| XP_021989736.1 | XP_022010291.1 | 1.0336 | 1.4328 | 0.72138 |
| XP_021972810.1 | XP_022006327.1 | 1.285  | 1.7804 | 0.72175 |
| XP_021993221.1 | XP_021993551.1 | 1.3876 | 1.9225 | 0.72177 |
| XP_022002419.1 | XP_022026964.1 | 0.9609 | 1.3311 | 0.72188 |
| XP_022004979.1 | XP_022018622.1 | 1.3797 | 1.911  | 0.72198 |
| XP_021987457.1 | XP_021989734.1 | 1.1284 | 1.5628 | 0.72204 |
| XP_021973854.1 | XP_022002420.1 | 1.1499 | 1.5921 | 0.72225 |
| XP_021995116.1 | XP_022006927.1 | 1.3089 | 1.8122 | 0.72227 |
| XP_022022835.1 | XP_022035551.1 | 1.4045 | 1.9436 | 0.72263 |
| XP_022004980.1 | XP_022013560.1 | 1.0571 | 1.4628 | 0.72266 |
| XP_021973316.1 | XP_021992525.1 | 1.3486 | 1.8661 | 0.72268 |
| XP_022010294.1 | XP_022013239.1 | 0.9824 | 1.3592 | 0.72278 |
| XP_022010616.1 | XP_022018622.1 | 1.0528 | 1.4563 | 0.72293 |
| XP_021984981.2 | XP_021993551.1 | 1.3554 | 1.8742 | 0.72319 |
| XP_021968895.1 | XP_022004455.1 | 0.8321 | 1.1504 | 0.72331 |
| XP_022002419.1 | XP_022005608.1 | 0.9336 | 1.2906 | 0.72338 |
| XP_021993221.1 | XP_021995117.1 | 1.0804 | 1.4933 | 0.7235  |
| XP_021981388.1 | XP_021981626.1 | 1.024  | 1.4153 | 0.72352 |
| XP_021986500.1 | XP_035842399.1 | 1.1368 | 1.5707 | 0.72375 |
| XP_021981626.1 | XP_022010296.1 | 1.1536 | 1.5937 | 0.72385 |
| XP_022000196.1 | XP_022029740.1 | 1.2066 | 1.6664 | 0.72408 |
| XP_021993220.1 | XP_022029739.1 | 1.2273 | 1.6948 | 0.72416 |
| XP_022009213.1 | XP_022029740.1 | 1.113  | 1.5366 | 0.72433 |
| XP_022002421.1 | XP_022010919.1 | 0.9995 | 1.3798 | 0.72438 |
| XP_021981388.1 | XP_021984981.2 | 0.7937 | 1.0956 | 0.72444 |
| XP_021993222.1 | XP_022002421.1 | 1.0327 | 1.4255 | 0.72445 |
| XP_021981626.1 | XP_021989736.1 | 1.1911 | 1.6438 | 0.7246  |
| XP_021976022.1 | XP_035835830.1 | 1.4844 | 2.0485 | 0.72463 |
| XP_021992525.1 | XP_022039085.1 | 1.5532 | 2.1433 | 0.72468 |
| XP_021972810.1 | XP_021989736.1 | 1.2262 | 1.692  | 0.7247  |
| XP_021987458.1 | XP_022022487.2 | 1.655  | 2.2834 | 0.7248  |
| XP_021992525.1 | XP_022000196.1 | 1.4403 | 1.9862 | 0.72515 |
| XP_022006927.1 | XP_022010294.1 | 0.9014 | 1.2426 | 0.72541 |
| XP_021993622.1 | XP_022002418.1 | 1.1607 | 1.599  | 0.72589 |
| XP_022029740.1 | XP_022039074.2 | 0.7214 | 0.9938 | 0.7259  |

|                               |        |        |         |
|-------------------------------|--------|--------|---------|
| XP_021989736.1 XP_022026964.1 | 1.0274 | 1.4153 | 0.72592 |
| XP_022021912.1 XP_022022487.2 | 1.3983 | 1.9259 | 0.72605 |
| XP_021972810.1 XP_021999258.1 | 1.2781 | 1.7603 | 0.72607 |
| XP_022004979.1 XP_022013239.1 | 1.288  | 1.7738 | 0.72612 |
| XP_021987458.1 XP_021989734.1 | 1.1526 | 1.5872 | 0.72618 |
| XP_022008276.2 XP_022035384.1 | 1.5849 | 2.1824 | 0.72622 |
| XP_022002419.1 XP_022010296.1 | 0.6407 | 0.8822 | 0.72625 |
| XP_021969020.1 XP_021993551.1 | 1.6499 | 2.2716 | 0.72632 |
| XP_022002416.1 XP_022013560.1 | 0.6007 | 0.827  | 0.72636 |
| XP_022026963.1 XP_022026964.1 | 0.4456 | 0.6134 | 0.72644 |
| XP_022000196.1 XP_022014870.1 | 1.3929 | 1.9173 | 0.72649 |
| XP_022039074.2 XP_035842399.1 | 1.505  | 2.0713 | 0.7266  |
| XP_022005608.1 XP_022021912.1 | 1.2034 | 1.6557 | 0.72682 |
| XP_021989737.1 XP_022001254.1 | 1.2013 | 1.6524 | 0.727   |
| XP_021993551.1 XP_022013560.1 | 1.3293 | 1.8284 | 0.72703 |
| XP_021993222.1 XP_022008275.1 | 1.205  | 1.6558 | 0.72774 |
| XP_022009213.1 XP_022022487.2 | 1.2686 | 1.7431 | 0.72778 |
| XP_021985239.1 XP_022021911.1 | 1.3024 | 1.7893 | 0.72788 |
| XP_021985239.1 XP_022021913.1 | 1.3024 | 1.7893 | 0.72788 |
| XP_021985239.1 XP_022021914.1 | 1.3024 | 1.7893 | 0.72788 |
| XP_022001254.1 XP_022010294.1 | 1.1194 | 1.5376 | 0.72802 |
| XP_022002419.1 XP_022022835.1 | 1.0838 | 1.4879 | 0.72841 |
| XP_022010296.1 XP_022010919.1 | 0.9876 | 1.3555 | 0.72859 |
| XP_021993622.1 XP_022004979.1 | 1.2071 | 1.6564 | 0.72875 |
| XP_021993221.1 XP_022010295.2 | 1.2134 | 1.6649 | 0.72881 |
| XP_021989735.1 XP_022010291.1 | 1.0547 | 1.4467 | 0.72904 |
| XP_022010296.1 XP_035838717.1 | 0.9632 | 1.3206 | 0.72937 |
| XP_021995116.1 XP_022010919.1 | 1.666  | 2.2834 | 0.72961 |
| XP_021984766.1 XP_022013558.1 | 1.0122 | 1.3869 | 0.72983 |
| XP_021988229.1 XP_022010291.1 | 0.9355 | 1.2817 | 0.72989 |
| XP_022013183.1 XP_022022835.1 | 1.3208 | 1.8095 | 0.72993 |
| XP_021976022.1 XP_021989734.1 | 1.1193 | 1.5333 | 0.72999 |
| XP_021993620.1 XP_022002416.1 | 0.9465 | 1.2964 | 0.7301  |
| XP_021989734.1 XP_022013239.1 | 1.4268 | 1.9542 | 0.73012 |
| XP_021993220.1 XP_022002420.1 | 1.0237 | 1.402  | 0.73017 |
| XP_021973854.1 XP_021989735.1 | 1.3492 | 1.8477 | 0.73021 |
| XP_021984766.1 XP_022002420.1 | 1.1214 | 1.5356 | 0.73027 |
| XP_021986500.1 XP_021993052.1 | 0.9984 | 1.3669 | 0.73041 |
| XP_021989734.1 XP_022022835.1 | 1.2518 | 1.7137 | 0.73047 |
| XP_021993052.1 XP_021993622.1 | 1.6323 | 2.2335 | 0.73083 |
| XP_022006668.1 XP_022013558.1 | 0.9165 | 1.2538 | 0.73098 |
| XP_021985239.1 XP_021989737.1 | 1.0715 | 1.4658 | 0.731   |
| XP_021993622.1 XP_035833070.1 | 1.3165 | 1.8003 | 0.73127 |
| XP_022010291.1 XP_022013239.1 | 1.0996 | 1.5035 | 0.73136 |
| XP_022005608.1 XP_022009213.1 | 1.041  | 1.4231 | 0.7315  |
| XP_021981626.1 XP_022004979.1 | 1.1949 | 1.6333 | 0.73159 |
| XP_021999258.1 XP_022010292.1 | 1.0966 | 1.4989 | 0.7316  |
| XP_021976022.1 XP_021989735.1 | 1.219  | 1.6662 | 0.7316  |
| XP_022008276.2 XP_022026964.1 | 1.1972 | 1.6364 | 0.73161 |
| XP_022006327.1 XP_022018622.1 | 1.5226 | 2.0799 | 0.73205 |
| XP_022002420.1 XP_022010295.2 | 0.5574 | 0.7612 | 0.73226 |
| XP_022006926.1 XP_022035384.1 | 1.2023 | 1.6417 | 0.73235 |
| XP_021995116.1 XP_021995117.1 | 1.1161 | 1.5236 | 0.73254 |
| XP_021984981.2 XP_021993283.1 | 1.4208 | 1.9395 | 0.73256 |
| XP_022005608.1 XP_035838717.1 | 1.0224 | 1.3956 | 0.73259 |
| XP_022010292.1 XP_022022835.1 | 1.0097 | 1.3777 | 0.73289 |
| XP_022006327.1 XP_022010616.1 | 1.5938 | 2.1741 | 0.73308 |
| XP_021985239.1 XP_021995117.1 | 0.9185 | 1.2529 | 0.7331  |
| XP_021993222.1 XP_022000196.1 | 1.5598 | 2.1267 | 0.73344 |
| XP_021981626.1 XP_022013239.1 | 1.444  | 1.9677 | 0.73385 |
| XP_021972810.1 XP_035833070.1 | 1.1935 | 1.6257 | 0.73415 |
| XP_021986500.1 XP_021988229.1 | 1.1711 | 1.5951 | 0.73419 |
| XP_021993052.1 XP_022010296.1 | 0.8747 | 1.1913 | 0.73424 |
| XP_021989733.1 XP_021993220.1 | 1.4898 | 2.0289 | 0.73429 |
| XP_021978807.1 XP_021989733.1 | 1.2559 | 1.7098 | 0.73453 |
| XP_021973854.1 XP_022013560.1 | 1.1628 | 1.5823 | 0.73488 |
| XP_021988953.1 XP_022014870.1 | 1.1201 | 1.5241 | 0.73493 |
| XP_021981407.1 XP_022013182.1 | 0.8645 | 1.1758 | 0.73524 |
| XP_022013560.1 XP_022022835.1 | 1.1908 | 1.6195 | 0.73529 |
| XP_021973855.1 XP_021989737.1 | 1.821  | 2.4765 | 0.73531 |
| XP_021984981.2 XP_022035551.1 | 0.8783 | 1.1941 | 0.73553 |
| XP_021984766.1 XP_021989733.1 | 1.0139 | 1.3783 | 0.73562 |
| XP_021978842.1 XP_021988953.1 | 1.2822 | 1.7428 | 0.73571 |
| XP_022010292.1 XP_022035384.1 | 0.9944 | 1.3514 | 0.73583 |
| XP_022002421.1 XP_022021913.1 | 1.1116 | 1.5105 | 0.73592 |
| XP_022002421.1 XP_022021914.1 | 1.1116 | 1.5105 | 0.73592 |
| XP_021986500.1 XP_021992525.1 | 1.0938 | 1.486  | 0.73607 |
| XP_022000196.1 XP_022039074.2 | 1.222  | 1.66   | 0.73614 |
| XP_021993052.1 XP_022010616.1 | 1.1369 | 1.5443 | 0.73619 |
| XP_022010291.1 XP_022014870.1 | 1.0763 | 1.4616 | 0.73638 |
| XP_021976022.1 XP_022002418.1 | 1.1838 | 1.6075 | 0.73642 |
| XP_021984981.2 XP_022001254.1 | 1.354  | 1.8386 | 0.73643 |
| XP_022013182.1 XP_022022835.1 | 1.3496 | 1.8323 | 0.73656 |
| XP_021987458.1 XP_021989735.1 | 1.1882 | 1.6129 | 0.73669 |
| XP_021988229.1 XP_021993622.1 | 1.4844 | 2.0132 | 0.73733 |
| XP_021993052.1 XP_022022835.1 | 1.3319 | 1.806  | 0.73749 |
| XP_022000196.1 XP_022002416.1 | 1.0174 | 1.3795 | 0.73751 |
| XP_022006327.1 XP_022013182.1 | 1.1983 | 1.6243 | 0.73773 |



|                               |        |        |         |
|-------------------------------|--------|--------|---------|
| XP_021988953.1 XP_022004980.1 | 1.264  | 1.7125 | 0.7381  |
| XP_021993220.1 XP_022034230.1 | 1.2021 | 1.6285 | 0.73816 |
| XP_022010291.1 XP_022029740.1 | 0.5393 | 0.7304 | 0.73836 |
| XP_022010296.1 XP_022013182.1 | 1.307  | 1.7687 | 0.73896 |
| XP_021993620.1 XP_035838717.1 | 1.2287 | 1.6626 | 0.73902 |
| XP_021978842.1 XP_022005608.1 | 1.0637 | 1.4389 | 0.73925 |
| XP_022004979.1 XP_022021911.1 | 1.2691 | 1.7167 | 0.73927 |
| XP_022004979.1 XP_022021913.1 | 1.2691 | 1.7167 | 0.73927 |
| XP_022004979.1 XP_022021914.1 | 1.2691 | 1.7167 | 0.73927 |
| XP_021973316.1 XP_022013183.1 | 1.4267 | 1.9293 | 0.73949 |
| XP_021988953.1 XP_022010616.1 | 1.2644 | 1.7098 | 0.7395  |
| XP_021986500.1 XP_022014870.1 | 0.8833 | 1.1942 | 0.73966 |
| XP_022001254.1 XP_022010292.1 | 1.1189 | 1.5127 | 0.73967 |
| XP_021973854.1 XP_022000196.1 | 1.4917 | 2.0166 | 0.73971 |
| XP_022002420.1 XP_022026963.1 | 1.0461 | 1.4138 | 0.73992 |
| XP_022002417.1 XP_022018622.1 | 0.9215 | 1.2451 | 0.7401  |
| XP_022013558.1 XP_022013560.1 | 0.3028 | 0.4091 | 0.74016 |
| XP_021992525.1 XP_022029738.1 | 1.3894 | 1.8771 | 0.74018 |
| XP_022008276.2 XP_022013239.1 | 1.5237 | 2.0581 | 0.74034 |
| XP_022002419.1 XP_022039085.1 | 0.6462 | 0.8723 | 0.7408  |
| XP_022013558.1 XP_022022487.2 | 0.8315 | 1.1223 | 0.74089 |
| XP_021988229.1 XP_022010101.1 | 1.1659 | 1.5733 | 0.74105 |
| XP_021999258.1 XP_022008275.1 | 1.5962 | 2.1538 | 0.74111 |
| XP_021985239.1 XP_022010295.2 | 0.8546 | 1.1531 | 0.74113 |
| XP_021981395.1 XP_035835830.1 | 1.0159 | 1.3705 | 0.74126 |
| XP_021993622.1 XP_022010294.1 | 1.345  | 1.8141 | 0.74141 |
| XP_021973854.1 XP_021993052.1 | 1.312  | 1.7693 | 0.74154 |
| XP_021993052.1 XP_022002416.1 | 0.7682 | 1.0359 | 0.74158 |
| XP_022006327.1 XP_022035384.1 | 1.4713 | 1.9837 | 0.74169 |
| XP_022005608.1 XP_022018622.1 | 1.0384 | 1.3999 | 0.74177 |
| XP_022004455.1 XP_022010294.1 | 0.5814 | 0.7837 | 0.74187 |
| XP_021993620.1 XP_022010919.1 | 1.3381 | 1.8034 | 0.74199 |
| XP_021993052.1 XP_022005608.1 | 1.1393 | 1.535  | 0.74221 |
| XP_021978807.1 XP_021981626.1 | 1.1901 | 1.6031 | 0.74237 |
| XP_021981626.1 XP_022002415.1 | 0.9683 | 1.3042 | 0.74245 |
| XP_022001254.1 XP_022010295.2 | 1.1155 | 1.5023 | 0.74253 |
| XP_021993052.1 XP_022018622.1 | 0.6857 | 0.9234 | 0.74258 |
| XP_021986500.1 XP_022000196.1 | 1.2156 | 1.6362 | 0.74294 |
| XP_021973854.1 XP_022013182.1 | 1.4721 | 1.9813 | 0.743   |
| XP_022001254.1 XP_022002421.1 | 1.1853 | 1.5952 | 0.74304 |
| XP_021985239.1 XP_021993622.1 | 1.6371 | 2.2029 | 0.74316 |
| XP_021988953.1 XP_022002417.1 | 1.1182 | 1.504  | 0.74348 |
| XP_021973854.1 XP_022013558.1 | 1.158  | 1.5573 | 0.74359 |
| XP_021978842.1 XP_021989737.1 | 0.9585 | 1.289  | 0.7436  |
| XP_021993052.1 XP_022039085.1 | 1.0485 | 1.4099 | 0.74367 |
| XP_021978842.1 XP_021981395.1 | 1.112  | 1.4947 | 0.74396 |
| XP_021985239.1 XP_021993620.1 | 1.2361 | 1.6611 | 0.74415 |
| XP_021989736.1 XP_021995116.1 | 1.3712 | 1.842  | 0.74441 |
| XP_021993221.1 XP_022010296.1 | 1.289  | 1.7312 | 0.74457 |
| XP_022002416.1 XP_022021912.1 | 1.1045 | 1.4829 | 0.74482 |
| XP_021981388.1 XP_022022835.1 | 1.3578 | 1.8225 | 0.74502 |
| XP_022008276.2 XP_035833070.1 | 1.2241 | 1.6426 | 0.74522 |
| XP_021992525.1 XP_021993222.1 | 1.4881 | 1.9965 | 0.74535 |
| XP_022002418.1 XP_022018622.1 | 0.8482 | 1.1377 | 0.74554 |
| XP_021981388.1 XP_022029738.1 | 1.1429 | 1.5329 | 0.74558 |
| XP_021989736.1 XP_022005608.1 | 0.9785 | 1.3124 | 0.74558 |
| XP_022006327.1 XP_022039085.1 | 1.4731 | 1.9749 | 0.74591 |
| XP_021993221.1 XP_022034230.1 | 1.5085 | 2.0213 | 0.7463  |
| XP_022010294.1 XP_022039074.2 | 0.8579 | 1.1492 | 0.74652 |
| XP_022004980.1 XP_022009213.1 | 1.1328 | 1.5174 | 0.74654 |
| XP_021978807.1 XP_021993621.2 | 1.1675 | 1.5637 | 0.74663 |
| XP_021987457.1 XP_021992525.1 | 1.2933 | 1.7321 | 0.74667 |
| XP_021978842.1 XP_022035384.1 | 1.5087 | 2.0204 | 0.74673 |
| XP_021988953.1 XP_022013239.1 | 1.3904 | 1.8609 | 0.74717 |
| XP_022006927.1 XP_022021913.1 | 1.3738 | 1.8383 | 0.74732 |
| XP_022006927.1 XP_022021914.1 | 1.3738 | 1.8383 | 0.74732 |
| XP_022006927.1 XP_022034230.1 | 0.7629 | 1.0207 | 0.74743 |
| XP_021976022.1 XP_022002415.1 | 1.1835 | 1.5834 | 0.74744 |
| XP_021973011.1 XP_021989735.1 | 1.1516 | 1.5406 | 0.7475  |
| XP_022006327.1 XP_022010919.1 | 1.1737 | 1.5697 | 0.74772 |
| XP_021993283.1 XP_022006668.1 | 1.9014 | 2.5412 | 0.74823 |
| XP_021978842.1 XP_022006927.1 | 1.3505 | 1.8046 | 0.74837 |
| XP_021973011.1 XP_021988229.1 | 1.1433 | 1.5277 | 0.74838 |
| XP_021978842.1 XP_022013560.1 | 1.175  | 1.5699 | 0.74846 |
| XP_021993222.1 XP_022029622.1 | 1.3476 | 1.7995 | 0.74887 |
| XP_021978807.1 XP_022035551.1 | 1.2108 | 1.6167 | 0.74893 |
| XP_021978807.1 XP_022035552.1 | 1.2108 | 1.6167 | 0.74893 |
| XP_021989735.1 XP_022005608.1 | 1.0165 | 1.3572 | 0.74897 |
| XP_021978807.1 XP_022037775.1 | 1.1305 | 1.5093 | 0.74902 |
| XP_021993621.2 XP_022022835.1 | 1.2207 | 1.6297 | 0.74903 |
| XP_022010291.1 XP_022029738.1 | 0.7417 | 0.99   | 0.74919 |
| XP_022014870.1 XP_022037775.1 | 1.1515 | 1.5369 | 0.74924 |
| XP_021989735.1 XP_021995116.1 | 1.3762 | 1.8361 | 0.74952 |
| XP_022004455.1 XP_022005608.1 | 0.917  | 1.2231 | 0.74973 |
| XP_021989734.1 XP_022039085.1 | 1.2163 | 1.6222 | 0.74978 |
| XP_021989736.1 XP_022039074.2 | 1.1611 | 1.5474 | 0.75036 |
| XP_022006327.1 XP_022029738.1 | 1.2849 | 1.7123 | 0.75039 |
| XP_021995116.1 XP_022002420.1 | 1.2161 | 1.6201 | 0.75063 |

|                |                |        |        |         |
|----------------|----------------|--------|--------|---------|
| XP_022005608.1 | XP_022006926.1 | 1.1996 | 1.5975 | 0.75092 |
| XP_021968895.1 | XP_022006668.1 | 1.3339 | 1.7763 | 0.75094 |
| XP_021969020.1 | XP_022010294.1 | 1.0511 | 1.3994 | 0.75111 |
| XP_021987457.1 | XP_022006926.1 | 1.5116 | 2.0124 | 0.75114 |
| XP_021988953.1 | XP_022035384.1 | 1.3787 | 1.8353 | 0.75121 |
| XP_021988229.1 | XP_022001254.1 | 1.346  | 1.7917 | 0.75124 |
| XP_022006327.1 | XP_022029739.1 | 1.3229 | 1.7608 | 0.75131 |
| XP_022006668.1 | XP_022010292.1 | 0.9628 | 1.2815 | 0.75131 |
| XP_021993622.1 | XP_022002420.1 | 1.1971 | 1.5933 | 0.75133 |
| XP_022002421.1 | XP_022026964.1 | 0.9811 | 1.3058 | 0.75134 |
| XP_021969020.1 | XP_021973316.1 | 1.6595 | 2.207  | 0.75193 |
| XP_022002420.1 | XP_022004980.1 | 1.157  | 1.5378 | 0.75237 |
| XP_021981388.1 | XP_022014870.1 | 0.9517 | 1.2648 | 0.75245 |
| XP_022013182.1 | XP_022039074.2 | 1.3812 | 1.8349 | 0.75274 |
| XP_021973316.1 | XP_022001254.1 | 1.1074 | 1.4709 | 0.75287 |
| XP_021984981.2 | XP_021985239.1 | 1.026  | 1.3624 | 0.75308 |
| XP_022010291.1 | XP_022013183.1 | 1.3111 | 1.7408 | 0.75316 |
| XP_021973855.1 | XP_022004455.1 | 1.3676 | 1.8158 | 0.75317 |
| XP_021978807.1 | XP_022039074.2 | 1.058  | 1.4046 | 0.75324 |
| XP_021972810.1 | XP_022009213.1 | 1.237  | 1.6419 | 0.7534  |
| XP_021978807.1 | XP_022033162.1 | 1.1809 | 1.5673 | 0.75346 |
| XP_021973855.1 | XP_022010616.1 | 1.3205 | 1.7525 | 0.7535  |
| XP_021973011.1 | XP_022033162.1 | 1.0595 | 1.4061 | 0.7535  |
| XP_022013239.1 | XP_022029738.1 | 1.1755 | 1.5596 | 0.75372 |
| XP_022010101.1 | XP_035833070.1 | 1.0976 | 1.4562 | 0.75374 |
| XP_021989733.1 | XP_022035552.1 | 0.901  | 1.1953 | 0.75379 |
| XP_021972810.1 | XP_022035551.1 | 1.1993 | 1.5909 | 0.75385 |
| XP_021972810.1 | XP_022035552.1 | 1.1993 | 1.5909 | 0.75385 |
| XP_021984981.2 | XP_022021912.1 | 1.1709 | 1.5526 | 0.75415 |
| XP_022002421.1 | XP_022010291.1 | 0.6375 | 0.8451 | 0.75435 |
| XP_021993222.1 | XP_022039074.2 | 1.4271 | 1.8917 | 0.7544  |
| XP_021973855.1 | XP_021984766.1 | 1.8391 | 2.4378 | 0.75441 |
| XP_022010295.2 | XP_022039074.2 | 0.8179 | 1.0841 | 0.75445 |
| XP_021973011.1 | XP_021989733.1 | 1.0458 | 1.3858 | 0.75465 |
| XP_021987457.1 | XP_021989733.1 | 1.0428 | 1.3817 | 0.75472 |
| XP_022022487.2 | XP_035833070.1 | 1.4265 | 1.89   | 0.75476 |
| XP_022021911.1 | XP_035838717.1 | 1.1981 | 1.5867 | 0.75509 |
| XP_022029740.1 | XP_022039085.1 | 0.7246 | 0.9596 | 0.75511 |
| XP_022002416.1 | XP_022039085.1 | 0.6787 | 0.8987 | 0.7552  |
| XP_022002421.1 | XP_035835830.1 | 0.5099 | 0.6749 | 0.75552 |
| XP_021993551.1 | XP_021995116.1 | 1.5891 | 2.1025 | 0.75581 |
| XP_021981388.1 | XP_021999258.1 | 1.2849 | 1.6998 | 0.75591 |
| XP_022010291.1 | XP_022013560.1 | 0.5648 | 0.747  | 0.75609 |
| XP_022021913.1 | XP_035838717.1 | 1.204  | 1.5921 | 0.75623 |
| XP_022021914.1 | XP_035838717.1 | 1.204  | 1.5921 | 0.75623 |
| XP_021984981.2 | XP_021993052.1 | 1.4605 | 1.9311 | 0.7563  |
| XP_021985239.1 | XP_021988229.1 | 0.8148 | 1.0773 | 0.75634 |
| XP_021973855.1 | XP_021989735.1 | 1.7773 | 2.3494 | 0.75649 |
| XP_022010291.1 | XP_022029739.1 | 0.7003 | 0.9256 | 0.75659 |
| XP_021984981.2 | XP_022035552.1 | 0.8925 | 1.1794 | 0.75674 |
| XP_022004979.1 | XP_022039074.2 | 1.0725 | 1.4171 | 0.75683 |
| XP_021989736.1 | XP_022010295.2 | 1.0667 | 1.4092 | 0.75695 |
| XP_021993620.1 | XP_022021911.1 | 1.3349 | 1.7635 | 0.75696 |
| XP_021993620.1 | XP_022021913.1 | 1.3349 | 1.7635 | 0.75696 |
| XP_021993620.1 | XP_022021914.1 | 1.3349 | 1.7635 | 0.75696 |
| XP_021981407.1 | XP_022022835.1 | 1.1792 | 1.5578 | 0.75696 |
| XP_022002417.1 | XP_022026964.1 | 0.9522 | 1.2579 | 0.75698 |
| XP_022022487.2 | XP_022029740.1 | 1.0099 | 1.3334 | 0.75739 |
| XP_021973011.1 | XP_022014870.1 | 1.125  | 1.4851 | 0.75752 |
| XP_021987458.1 | XP_021989737.1 | 1.082  | 1.4278 | 0.75781 |
| XP_021993052.1 | XP_022002418.1 | 0.7706 | 1.0168 | 0.75787 |
| XP_021993621.2 | XP_022004980.1 | 1.3248 | 1.7478 | 0.75798 |
| XP_021993220.1 | XP_022001254.1 | 1.5346 | 2.0244 | 0.75805 |
| XP_022021912.1 | XP_022029738.1 | 1.1465 | 1.5121 | 0.75822 |
| XP_021984981.2 | XP_022039074.2 | 1.2545 | 1.6544 | 0.75828 |
| XP_021993283.1 | XP_022010294.1 | 1.4644 | 1.9307 | 0.75848 |
| XP_021969020.1 | XP_022010616.1 | 1.2425 | 1.6381 | 0.7585  |
| XP_022002415.1 | XP_022010919.1 | 0.9982 | 1.3159 | 0.75857 |
| XP_022002416.1 | XP_022029739.1 | 0.4446 | 0.5859 | 0.75883 |
| XP_021981407.1 | XP_021993220.1 | 1.4081 | 1.8556 | 0.75884 |
| XP_021981626.1 | XP_022039085.1 | 1.6818 | 2.2155 | 0.75911 |
| XP_021986500.1 | XP_022005608.1 | 0.9607 | 1.2648 | 0.75957 |
| XP_021987457.1 | XP_022010101.1 | 1.3675 | 1.8003 | 0.7596  |
| XP_022006926.1 | XP_022021913.1 | 1.7216 | 2.2653 | 0.75999 |
| XP_022006926.1 | XP_022021914.1 | 1.7216 | 2.2653 | 0.75999 |
| XP_021978807.1 | XP_022013183.1 | 1.1826 | 1.555  | 0.76051 |
| XP_022010292.1 | XP_022010295.2 | 0.1716 | 0.2256 | 0.76064 |
| XP_021987458.1 | XP_021989733.1 | 1.0547 | 1.3865 | 0.76069 |
| XP_022002419.1 | XP_022013560.1 | 0.6429 | 0.8449 | 0.76092 |
| XP_021968895.1 | XP_022010292.1 | 0.9314 | 1.224  | 0.76095 |
| XP_021987457.1 | XP_021995116.1 | 1.6033 | 2.1069 | 0.76098 |
| XP_022000196.1 | XP_022010294.1 | 1.1458 | 1.5055 | 0.76108 |
| XP_022002421.1 | XP_022006926.1 | 0.885  | 1.1621 | 0.76155 |
| XP_022013239.1 | XP_022013558.1 | 0.9381 | 1.231  | 0.76206 |
| XP_021989737.1 | XP_022010295.2 | 0.9941 | 1.3044 | 0.76211 |
| XP_021973855.1 | XP_021984981.2 | 1.736  | 2.2778 | 0.76214 |
| XP_021993221.1 | XP_022000224.2 | 1.5921 | 2.0888 | 0.76221 |
| XP_021984981.2 | XP_022013182.1 | 0.9566 | 1.255  | 0.76223 |

|                               |        |        |         |
|-------------------------------|--------|--------|---------|
| XP_021993283.1 XP_022010101.1 | 1.4549 | 1.9087 | 0.76225 |
| XP_021988229.1 XP_022029740.1 | 0.8634 | 1.1326 | 0.76232 |
| XP_021989734.1 XP_022022487.2 | 1.2955 | 1.6981 | 0.76291 |
| XP_021985239.1 XP_022006926.1 | 1.2146 | 1.5913 | 0.76328 |
| XP_022002418.1 XP_022039085.1 | 0.7004 | 0.9175 | 0.76338 |
| XP_021981388.1 XP_022026964.1 | 1.132  | 1.4817 | 0.76399 |
| XP_021993222.1 XP_022022835.1 | 1.4716 | 1.9255 | 0.76427 |
| XP_021989734.1 XP_022008275.1 | 1.0492 | 1.3728 | 0.76428 |
| XP_021993621.2 XP_022037775.1 | 1.6108 | 2.1067 | 0.76461 |
| XP_022000224.2 XP_022002419.1 | 0.9182 | 1.2008 | 0.76466 |
| XP_022002417.1 XP_035842399.1 | 1.174  | 1.5348 | 0.76492 |
| XP_022010919.1 XP_022013560.1 | 0.9903 | 1.2946 | 0.76495 |
| XP_021968895.1 XP_021993222.1 | 1.2657 | 1.6543 | 0.7651  |
| XP_022005608.1 XP_022026964.1 | 1.2826 | 1.6749 | 0.76578 |
| XP_021993222.1 XP_022035384.1 | 1.7209 | 2.2471 | 0.76583 |
| XP_022002415.1 XP_022039085.1 | 0.6883 | 0.8978 | 0.76665 |
| XP_021993620.1 XP_022022487.2 | 1.5408 | 2.0096 | 0.76672 |
| XP_022001254.1 XP_022010919.1 | 1.428  | 1.8623 | 0.76679 |
| XP_021995116.1 XP_022037775.1 | 1.349  | 1.7587 | 0.76704 |
| XP_021985239.1 XP_022010294.1 | 0.8577 | 1.1177 | 0.76738 |
| XP_022010291.1 XP_022013558.1 | 0.535  | 0.6966 | 0.76802 |
| XP_021984766.1 XP_022021911.1 | 1.5491 | 2.0159 | 0.76844 |
| XP_021989733.1 XP_022000196.1 | 1.2079 | 1.5714 | 0.76868 |
| XP_021987457.1 XP_022029622.1 | 1.4475 | 1.8828 | 0.7688  |
| XP_021981626.1 XP_021986500.1 | 1.1293 | 1.4689 | 0.76881 |
| XP_022010296.1 XP_022026964.1 | 1.0171 | 1.3227 | 0.76896 |
| XP_022018622.1 XP_022029739.1 | 0.9687 | 1.2594 | 0.76918 |
| XP_021989733.1 XP_022035551.1 | 0.8969 | 1.1658 | 0.76934 |
| XP_022010101.1 XP_035842399.1 | 1.6494 | 2.1439 | 0.76935 |
| XP_022002417.1 XP_022029739.1 | 0.4762 | 0.6186 | 0.7698  |
| XP_021989735.1 XP_022008275.1 | 1.0949 | 1.4221 | 0.76992 |
| XP_021987457.1 XP_021989737.1 | 1.0828 | 1.4058 | 0.77024 |
| XP_021993220.1 XP_022029738.1 | 0.9214 | 1.1959 | 0.77047 |
| XP_022002417.1 XP_022002421.1 | 0.2177 | 0.2825 | 0.77062 |
| XP_021973316.1 XP_021989736.1 | 1.2624 | 1.6381 | 0.77065 |
| XP_022006668.1 XP_022010296.1 | 0.9548 | 1.2389 | 0.77068 |
| XP_021993620.1 XP_022009213.1 | 1.2755 | 1.655  | 0.77069 |
| XP_021993222.1 XP_022010101.1 | 1.5439 | 2.0027 | 0.77091 |
| XP_021981388.1 XP_021989735.1 | 0.4062 | 0.5269 | 0.77092 |
| XP_021993621.2 XP_022006668.1 | 1.1823 | 1.5332 | 0.77113 |
| XP_021987457.1 XP_022010296.1 | 1.2386 | 1.6058 | 0.77133 |
| XP_022018622.1 XP_022021912.1 | 1.045  | 1.354  | 0.77179 |
| XP_022004455.1 XP_022018622.1 | 1.142  | 1.4794 | 0.77193 |
| XP_021988229.1 XP_021993220.1 | 1.2958 | 1.6785 | 0.772   |
| XP_021987457.1 XP_021989735.1 | 1.1931 | 1.5454 | 0.77203 |
| XP_021987458.1 XP_021989736.1 | 1.1515 | 1.4914 | 0.77209 |
| XP_021986500.1 XP_021989733.1 | 1.0212 | 1.3225 | 0.77217 |
| XP_021981407.1 XP_021984981.2 | 0.7638 | 0.9887 | 0.77253 |
| XP_022006668.1 XP_022010295.2 | 0.918  | 1.1881 | 0.77266 |
| XP_022002418.1 XP_022029739.1 | 0.4379 | 0.5667 | 0.77272 |
| XP_022013560.1 XP_022035384.1 | 1.2173 | 1.575  | 0.77289 |
| XP_022013239.1 XP_035842399.1 | 1.5413 | 1.9935 | 0.77316 |
| XP_021988953.1 XP_022021913.1 | 1.3578 | 1.7552 | 0.77359 |
| XP_021988953.1 XP_022021914.1 | 1.3578 | 1.7552 | 0.77359 |
| XP_022021912.1 XP_035842399.1 | 1.8329 | 2.3679 | 0.77406 |
| XP_021993052.1 XP_021993551.1 | 1.2398 | 1.6016 | 0.7741  |
| XP_021981388.1 XP_022013239.1 | 1.2485 | 1.6125 | 0.77426 |
| XP_021988953.1 XP_022002416.1 | 1.0447 | 1.349  | 0.77443 |
| XP_021978842.1 XP_021993551.1 | 1.4833 | 1.9142 | 0.77489 |
| XP_021989737.1 XP_022005608.1 | 1.0487 | 1.3533 | 0.77492 |
| XP_021973316.1 XP_022010295.2 | 1.12   | 1.4452 | 0.77498 |
| XP_022000224.2 XP_022002416.1 | 0.8297 | 1.0706 | 0.77499 |
| XP_022000224.2 XP_022002417.1 | 0.8297 | 1.0706 | 0.77499 |
| XP_022005608.1 XP_022010101.1 | 1.263  | 1.6297 | 0.77499 |
| XP_022002417.1 XP_022013560.1 | 0.6085 | 0.7851 | 0.77506 |
| XP_021989736.1 XP_022022487.2 | 1.1224 | 1.4463 | 0.77605 |
| XP_021995117.1 XP_022002419.1 | 0.967  | 1.2459 | 0.77615 |
| XP_022000224.2 XP_022035551.1 | 1.251  | 1.6117 | 0.7762  |
| XP_022000224.2 XP_022035552.1 | 1.251  | 1.6117 | 0.7762  |
| XP_022002421.1 XP_022021911.1 | 1.1043 | 1.4222 | 0.77647 |
| XP_021988953.1 XP_035838717.1 | 1.1485 | 1.4777 | 0.77722 |
| XP_021993222.1 XP_021993283.1 | 1.5426 | 1.9846 | 0.77729 |
| XP_021973854.1 XP_021989736.1 | 1.3295 | 1.71   | 0.77749 |
| XP_022004979.1 XP_022035384.1 | 1.366  | 1.7555 | 0.77813 |
| XP_021978807.1 XP_022013182.1 | 1.237  | 1.5896 | 0.77818 |
| XP_021993222.1 XP_022039085.1 | 1.7582 | 2.2592 | 0.77824 |
| XP_021973854.1 XP_022029738.1 | 1.2885 | 1.6555 | 0.77831 |
| XP_022006327.1 XP_022029740.1 | 1.1898 | 1.5283 | 0.77851 |
| XP_021989737.1 XP_021993621.2 | 1.1391 | 1.4625 | 0.77887 |
| XP_021993220.1 XP_021993551.1 | 1.5819 | 2.031  | 0.77888 |
| XP_021989733.1 XP_022039074.2 | 1.0502 | 1.3482 | 0.77896 |
| XP_021981395.1 XP_021988953.1 | 1.1739 | 1.5068 | 0.77907 |
| XP_022000224.2 XP_022002415.1 | 0.8043 | 1.0318 | 0.77951 |
| XP_022002421.1 XP_022029739.1 | 0.4684 | 0.6008 | 0.77963 |
| XP_022013182.1 XP_022029622.1 | 1.3671 | 1.7535 | 0.77964 |
| XP_021972810.1 XP_021988229.1 | 0.8374 | 1.074  | 0.7797  |
| XP_022001254.1 XP_022008275.1 | 1.2918 | 1.6566 | 0.77979 |
| XP_021987458.1 XP_022006926.1 | 1.5219 | 1.9512 | 0.77998 |

|                               |        |        |         |
|-------------------------------|--------|--------|---------|
| XP_022010296.1 XP_022022835.1 | 1.1796 | 1.512  | 0.78016 |
| XP_022022487.2 XP_022029739.1 | 1.0545 | 1.3509 | 0.78059 |
| XP_021985239.1 XP_022033162.1 | 1.0205 | 1.3072 | 0.78068 |
| XP_021987458.1 XP_021995116.1 | 1.6301 | 2.0878 | 0.78077 |
| XP_022029740.1 XP_022035384.1 | 1.1637 | 1.4902 | 0.7809  |
| XP_021989735.1 XP_022026964.1 | 1.1288 | 1.4454 | 0.78096 |
| XP_021973316.1 XP_022034230.1 | 1.4834 | 1.8992 | 0.78107 |
| XP_021984766.1 XP_022010292.1 | 0.9732 | 1.2451 | 0.78162 |
| XP_021985239.1 XP_022014870.1 | 1.0903 | 1.3946 | 0.7818  |
| XP_021993621.2 XP_022010616.1 | 1.2156 | 1.554  | 0.78224 |
| XP_021976022.1 XP_022010295.2 | 1.0607 | 1.3556 | 0.78246 |
| XP_021981407.1 XP_022006927.1 | 1.204  | 1.5385 | 0.78258 |
| XP_021986500.1 XP_022006668.1 | 1.0551 | 1.3473 | 0.78312 |
| XP_021993620.1 XP_022021912.1 | 1.3354 | 1.7045 | 0.78346 |
| XP_021969020.1 XP_021984766.1 | 1.3174 | 1.6814 | 0.78351 |
| XP_022029622.1 XP_035838717.1 | 1.3135 | 1.6761 | 0.78366 |
| XP_021987458.1 XP_022010101.1 | 1.3601 | 1.7322 | 0.78519 |
| XP_022002415.1 XP_022026964.1 | 0.9342 | 1.1897 | 0.78524 |
| XP_022000196.1 XP_022002417.1 | 1.0478 | 1.3343 | 0.78528 |
| XP_021995117.1 XP_035835830.1 | 0.8997 | 1.1456 | 0.78535 |
| XP_021972810.1 XP_022002415.1 | 0.6227 | 0.7925 | 0.78574 |
| XP_021981388.1 XP_022034230.1 | 1.1528 | 1.467  | 0.78582 |
| XP_021987458.1 XP_022029622.1 | 1.4731 | 1.8732 | 0.78641 |
| XP_021993052.1 XP_022002420.1 | 0.8537 | 1.0853 | 0.7866  |
| XP_021978842.1 XP_022006668.1 | 1.2637 | 1.6062 | 0.78676 |
| XP_022002421.1 XP_022005608.1 | 0.9016 | 1.1459 | 0.78681 |
| XP_021993222.1 XP_022010292.1 | 1.2868 | 1.6353 | 0.78689 |
| XP_021993220.1 XP_021999258.1 | 1.4489 | 1.8411 | 0.78698 |
| XP_021987457.1 XP_021993222.1 | 1.5867 | 2.0151 | 0.78741 |
| XP_022001254.1 XP_022010616.1 | 1.3387 | 1.6997 | 0.78761 |
| XP_021981388.1 XP_022000196.1 | 1.0734 | 1.3625 | 0.78782 |
| XP_021973854.1 XP_035842399.1 | 1.489  | 1.89   | 0.78783 |
| XP_021999258.1 XP_022002421.1 | 1.054  | 1.3377 | 0.78792 |
| XP_021984981.2 XP_022013183.1 | 0.9635 | 1.2222 | 0.78833 |
| XP_022010292.1 XP_022022487.2 | 0.8545 | 1.0839 | 0.78836 |
| XP_021985239.1 XP_021986500.1 | 1.2292 | 1.5587 | 0.78861 |
| XP_022026964.1 XP_022039085.1 | 1.3859 | 1.7572 | 0.7887  |
| XP_021995116.1 XP_022026963.1 | 1.2572 | 1.5936 | 0.78891 |
| XP_021988953.1 XP_021995116.1 | 1.5148 | 1.9199 | 0.789   |
| XP_021993622.1 XP_022002416.1 | 1.1549 | 1.4637 | 0.78903 |
| XP_021978807.1 XP_022026963.1 | 1.3009 | 1.6479 | 0.78943 |
| XP_022004980.1 XP_022018622.1 | 1.3125 | 1.6625 | 0.78947 |
| XP_022010295.2 XP_022035384.1 | 1.0872 | 1.3763 | 0.78994 |
| XP_022006327.1 XP_022013560.1 | 1.1622 | 1.4706 | 0.79029 |
| XP_021993222.1 XP_022026964.1 | 1.2152 | 1.5376 | 0.79032 |
| XP_021989733.1 XP_022010291.1 | 1.002  | 1.2676 | 0.79047 |
| XP_022002416.1 XP_022018622.1 | 0.8539 | 1.0802 | 0.7905  |
| XP_022000196.1 XP_022005608.1 | 1.1281 | 1.4263 | 0.79093 |
| XP_021988953.1 XP_022034230.1 | 1.2389 | 1.566  | 0.79112 |
| XP_021987458.1 XP_022013239.1 | 1.4284 | 1.8055 | 0.79114 |
| XP_021981626.1 XP_021989735.1 | 1.2574 | 1.5888 | 0.79141 |
| XP_022006327.1 XP_022026964.1 | 1.3773 | 1.7403 | 0.79142 |
| XP_021993222.1 XP_022004455.1 | 1.1261 | 1.4228 | 0.79147 |
| XP_022009213.1 XP_022021912.1 | 1.2001 | 1.5162 | 0.79152 |
| XP_022010296.1 XP_022021911.1 | 1.1782 | 1.4885 | 0.79154 |
| XP_022006327.1 XP_022010295.2 | 1.147  | 1.449  | 0.79158 |
| XP_021989737.1 XP_022010919.1 | 1.1727 | 1.4797 | 0.79253 |
| XP_022026964.1 XP_022029622.1 | 1.1658 | 1.4706 | 0.79274 |
| XP_022029740.1 XP_035842399.1 | 1.142  | 1.4401 | 0.793   |
| XP_021995117.1 XP_022002418.1 | 0.8674 | 1.0938 | 0.79302 |
| XP_021978807.1 XP_021993551.1 | 1.443  | 1.8196 | 0.79303 |
| XP_021999258.1 XP_022004979.1 | 1.0803 | 1.3622 | 0.79306 |
| XP_022010291.1 XP_022010292.1 | 0.5592 | 0.705  | 0.79319 |
| XP_021993221.1 XP_022008276.2 | 1.4962 | 1.8862 | 0.79324 |
| XP_022022835.1 XP_022029739.1 | 1.177  | 1.4835 | 0.79339 |
| XP_022002420.1 XP_022013560.1 | 0.5536 | 0.6973 | 0.79392 |
| XP_021989737.1 XP_022002421.1 | 1.0193 | 1.2838 | 0.79397 |
| XP_021985239.1 XP_022010291.1 | 0.871  | 1.0969 | 0.79406 |
| XP_021984981.2 XP_022033162.1 | 1.3972 | 1.7589 | 0.79436 |
| XP_021981407.1 XP_022013183.1 | 0.863  | 1.0863 | 0.79444 |
| XP_021973011.1 XP_022039074.2 | 1.1825 | 1.4884 | 0.79448 |
| XP_021985239.1 XP_021993551.1 | 1.4665 | 1.8456 | 0.79459 |
| XP_021981626.1 XP_022006926.1 | 1.272  | 1.6008 | 0.7946  |
| XP_021973011.1 XP_022013560.1 | 1.0192 | 1.2824 | 0.79476 |
| XP_021986500.1 XP_022022835.1 | 1.284  | 1.6149 | 0.7951  |
| XP_022037775.1 XP_035838717.1 | 1.3396 | 1.6846 | 0.7952  |
| XP_021999258.1 XP_022014870.1 | 1.2634 | 1.5881 | 0.79554 |
| XP_022013183.1 XP_035833070.1 | 1.5514 | 1.9501 | 0.79555 |
| XP_021976022.1 XP_022004979.1 | 1.244  | 1.5636 | 0.7956  |
| XP_022000196.1 XP_022013183.1 | 1.3829 | 1.738  | 0.79568 |
| XP_021995117.1 XP_022035384.1 | 1.2489 | 1.5695 | 0.79573 |
| XP_021989737.1 XP_021993551.1 | 1.2788 | 1.607  | 0.79577 |
| XP_021999258.1 XP_022034230.1 | 1.3769 | 1.7298 | 0.79599 |
| XP_021968895.1 XP_022021912.1 | 1.2931 | 1.6239 | 0.79629 |
| XP_022004980.1 XP_022008276.2 | 1.1477 | 1.4406 | 0.79668 |
| XP_021993283.1 XP_022008276.2 | 1.2983 | 1.6295 | 0.79675 |
| XP_022010919.1 XP_022013558.1 | 0.869  | 1.0905 | 0.79688 |
| XP_021989733.1 XP_022002421.1 | 1.0431 | 1.3089 | 0.79693 |

|                               |        |        |         |
|-------------------------------|--------|--------|---------|
| XP_021986500.1 XP_022026964.1 | 1.1474 | 1.4397 | 0.79697 |
| XP_022010294.1 XP_022013183.1 | 1.3088 | 1.6419 | 0.79713 |
| XP_021993622.1 XP_022010616.1 | 1.4745 | 1.8497 | 0.79716 |
| XP_022018622.1 XP_022021913.1 | 1.0193 | 1.2786 | 0.7972  |
| XP_022018622.1 XP_022021914.1 | 1.0193 | 1.2786 | 0.7972  |
| XP_022002421.1 XP_022029738.1 | 0.4832 | 0.606  | 0.79736 |
| XP_021976022.1 XP_022013558.1 | 1.1057 | 1.3865 | 0.79748 |
| XP_021985239.1 XP_022013560.1 | 0.8708 | 1.0912 | 0.79802 |
| XP_022010296.1 XP_022013239.1 | 1.1184 | 1.4011 | 0.79823 |
| XP_021978842.1 XP_035838717.1 | 1.1595 | 1.4522 | 0.79844 |
| XP_021993622.1 XP_022010295.2 | 1.3309 | 1.6662 | 0.79876 |
| XP_021981626.1 XP_022039074.2 | 1.4465 | 1.8107 | 0.79886 |
| XP_021981388.1 XP_021989736.1 | 0.4191 | 0.5246 | 0.79889 |
| XP_022008276.2 XP_022034230.1 | 1.5056 | 1.8842 | 0.79907 |
| XP_021978842.1 XP_022002421.1 | 1.2494 | 1.5633 | 0.79921 |
| XP_022008275.1 XP_022018622.1 | 1.1223 | 1.4039 | 0.79942 |
| XP_022013182.1 XP_022015084.1 | 1.2638 | 1.5805 | 0.79962 |
| XP_021999258.1 XP_022006668.1 | 1.5105 | 1.889  | 0.79963 |
| XP_021986500.1 XP_022010295.2 | 0.9279 | 1.1601 | 0.79984 |
| XP_021972810.1 XP_021989737.1 | 1.1887 | 1.4859 | 0.79999 |
| XP_021993052.1 XP_022029740.1 | 0.8184 | 1.0229 | 0.80008 |
| XP_022014870.1 XP_022029622.1 | 1.409  | 1.7609 | 0.80016 |
| XP_022002418.1 XP_022026963.1 | 1.0124 | 1.2648 | 0.80044 |
| XP_021978842.1 XP_022010294.1 | 1.1876 | 1.4836 | 0.80049 |
| XP_021984766.1 XP_022010919.1 | 1.2534 | 1.5657 | 0.80054 |
| XP_021988229.1 XP_022033162.1 | 1.0064 | 1.257  | 0.80064 |
| XP_021989734.1 XP_022035384.1 | 1.1842 | 1.4789 | 0.80073 |
| XP_021981407.1 XP_022008276.2 | 1.3389 | 1.6712 | 0.80116 |
| XP_021993283.1 XP_022035384.1 | 1.2606 | 1.5733 | 0.80125 |
| XP_022022487.2 XP_022037775.1 | 1.6114 | 2.0108 | 0.80137 |
| XP_021981395.1 XP_035838717.1 | 0.7237 | 0.9028 | 0.80162 |
| XP_022002419.1 XP_022018622.1 | 0.9527 | 1.1883 | 0.80173 |
| XP_022006668.1 XP_022022487.2 | 1.4053 | 1.7525 | 0.80188 |
| XP_021976022.1 XP_022039085.1 | 1.5266 | 1.9036 | 0.80195 |
| XP_021993052.1 XP_022002415.1 | 0.8068 | 1.0059 | 0.80207 |
| XP_021973316.1 XP_022013182.1 | 1.4207 | 1.7709 | 0.80225 |
| XP_021985239.1 XP_022004980.1 | 1.3962 | 1.7399 | 0.80246 |
| XP_021995116.1 XP_022006668.1 | 1.3336 | 1.6614 | 0.8027  |
| XP_021978807.1 XP_021988229.1 | 1.0414 | 1.297  | 0.80293 |
| XP_021984981.2 XP_022022835.1 | 0.9604 | 1.196  | 0.80301 |
| XP_021995116.1 XP_022010291.1 | 1.2227 | 1.5224 | 0.80314 |
| XP_022006927.1 XP_022021912.1 | 1.5358 | 1.9115 | 0.80345 |
| XP_022002418.1 XP_022010295.2 | 0.5842 | 0.7271 | 0.80347 |
| XP_021976022.1 XP_022002417.1 | 1.188  | 1.4783 | 0.80363 |
| XP_022029738.1 XP_022034230.1 | 1.026  | 1.2763 | 0.80389 |
| XP_022010296.1 XP_022021913.1 | 1.1759 | 1.4625 | 0.80403 |
| XP_022010296.1 XP_022021914.1 | 1.1759 | 1.4625 | 0.80403 |
| XP_022000196.1 XP_022013182.1 | 1.4293 | 1.7767 | 0.80447 |
| XP_021973854.1 XP_022021913.1 | 1.7525 | 2.1781 | 0.8046  |
| XP_021973854.1 XP_022021914.1 | 1.7525 | 2.1781 | 0.8046  |
| XP_021984766.1 XP_022009213.1 | 0.9923 | 1.2327 | 0.80498 |
| XP_021984981.2 XP_022005608.1 | 1.0763 | 1.337  | 0.80501 |
| XP_021993052.1 XP_022010292.1 | 0.891  | 1.1068 | 0.80502 |
| XP_021985239.1 XP_022037775.1 | 1.1934 | 1.482  | 0.80526 |
| XP_022004979.1 XP_022009213.1 | 1.1436 | 1.42   | 0.80535 |
| XP_021973854.1 XP_022013183.1 | 1.4443 | 1.7928 | 0.80561 |
| XP_022006926.1 XP_022010919.1 | 1.238  | 1.5366 | 0.80567 |
| XP_021984981.2 XP_022008275.1 | 1.0533 | 1.3073 | 0.80571 |
| XP_022002415.1 XP_022026963.1 | 1.0025 | 1.2442 | 0.80574 |
| XP_021986500.1 XP_021993220.1 | 1.1862 | 1.4721 | 0.80579 |
| XP_022002420.1 XP_022005608.1 | 0.8333 | 1.0336 | 0.80621 |
| XP_021973855.1 XP_022015084.1 | 1.5789 | 1.9584 | 0.80622 |
| XP_021972810.1 XP_021981395.1 | 1.1547 | 1.4322 | 0.80624 |
| XP_021993283.1 XP_022010919.1 | 1.4958 | 1.855  | 0.80636 |
| XP_021993283.1 XP_022013183.1 | 1.4807 | 1.8356 | 0.80666 |
| XP_021992525.1 XP_022013182.1 | 0.2767 | 0.343  | 0.80671 |
| XP_021987458.1 XP_021992525.1 | 1.2394 | 1.5357 | 0.80706 |
| XP_022004979.1 XP_022006926.1 | 1.2844 | 1.5913 | 0.80714 |
| XP_022006327.1 XP_022010294.1 | 1.4349 | 1.7769 | 0.80753 |
| XP_021973011.1 XP_035842399.1 | 1.5242 | 1.8871 | 0.80769 |
| XP_021988953.1 XP_022021911.1 | 1.3509 | 1.6725 | 0.80771 |
| XP_021981407.1 XP_021992525.1 | 0.8627 | 1.068  | 0.80777 |
| XP_021993283.1 XP_022002420.1 | 1.2478 | 1.5445 | 0.8079  |
| XP_021989735.1 XP_022000196.1 | 1.0796 | 1.336  | 0.80808 |
| XP_021995116.1 XP_035838717.1 | 1.6012 | 1.9805 | 0.80848 |
| XP_022002418.1 XP_022029740.1 | 0.3886 | 0.4806 | 0.80857 |
| XP_021973316.1 XP_021988229.1 | 1.4209 | 1.7569 | 0.80875 |
| XP_021973854.1 XP_022002421.1 | 1.1769 | 1.4552 | 0.80875 |
| XP_021993220.1 XP_022006327.1 | 1.333  | 1.6479 | 0.80891 |
| XP_021987458.1 XP_022010292.1 | 1.2371 | 1.5291 | 0.80904 |
| XP_022009213.1 XP_022010295.2 | 1.0006 | 1.2367 | 0.80909 |
| XP_021973854.1 XP_022013239.1 | 1.9848 | 2.4526 | 0.80926 |
| XP_021973855.1 XP_021993621.2 | 1.1981 | 1.48   | 0.80953 |
| XP_021985239.1 XP_021988953.1 | 1.1752 | 1.4513 | 0.80976 |
| XP_021989736.1 XP_022022835.1 | 1.2771 | 1.5769 | 0.80988 |
| XP_022000196.1 XP_022002415.1 | 1.0403 | 1.2845 | 0.80989 |
| XP_021995117.1 XP_022005608.1 | 1.2754 | 1.5747 | 0.80993 |
| XP_022029738.1 XP_022033162.1 | 0.8229 | 1.0158 | 0.8101  |

|                 |                |        |        |         |
|-----------------|----------------|--------|--------|---------|
| XP_021973011.1  | XP_022035384.1 | 1.6463 | 2.031  | 0.81059 |
| XP_022008276.2  | XP_022039074.2 | 1.2866 | 1.587  | 0.81071 |
| XP_022022835.1  | XP_022039074.2 | 1.1153 | 1.3756 | 0.81077 |
| XP_022000224.2  | XP_022005608.1 | 1.3565 | 1.6722 | 0.81121 |
| XP_021993622.1  | XP_022026963.1 | 1.348  | 1.6616 | 0.81127 |
| XP_021976022.1  | XP_022026963.1 | 1.8677 | 2.3018 | 0.81141 |
| XP_021989735.1  | XP_022022835.1 | 1.3444 | 1.6568 | 0.81144 |
| XP_022002418.1  | XP_022013560.1 | 0.6306 | 0.7769 | 0.81169 |
| XP_021988953.1  | XP_022013558.1 | 1.0683 | 1.3156 | 0.81202 |
| XP_021984766.1  | XP_022004979.1 | 1.4285 | 1.7577 | 0.81271 |
| XP_022002420.1  | XP_022010616.1 | 0.8861 | 1.0894 | 0.81338 |
| XP_021993221.1  | XP_022010292.1 | 1.2996 | 1.5968 | 0.81388 |
| XP_021969020.1  | XP_021984981.2 | 1.3021 | 1.5995 | 0.81407 |
| XP_022008276.2  | XP_022009213.1 | 1.2781 | 1.5694 | 0.81439 |
| XP_021993052.1  | XP_022010294.1 | 0.9451 | 1.1602 | 0.8146  |
| XP_021973855.1  | XP_022008276.2 | 1.5825 | 1.9425 | 0.81467 |
| XP_022008275.1  | XP_022035552.1 | 1.33   | 1.6323 | 0.8148  |
| XP_022035551.1  | XP_022039085.1 | 1.1921 | 1.463  | 0.81483 |
| XP_022002415.1  | XP_022018622.1 | 0.8654 | 1.0618 | 0.81503 |
| XP_021986500.1  | XP_022006926.1 | 1.3262 | 1.6268 | 0.81522 |
| XP_021981388.1  | XP_035835830.1 | 1.0042 | 1.2314 | 0.81549 |
| XP_022010101.1  | XP_022022487.2 | 1.1594 | 1.4215 | 0.81562 |
| XP_021993222.1  | XP_022035552.1 | 1.38   | 1.6915 | 0.81584 |
| XP_022010919.1  | XP_022039074.2 | 1.2839 | 1.5737 | 0.81585 |
| XP_022001254.1  | XP_022013558.1 | 1.1032 | 1.3521 | 0.81592 |
| XP_021993220.1  | XP_022004980.1 | 1.1988 | 1.4691 | 0.81601 |
| XP_022006927.1  | XP_022021911.1 | 1.3923 | 1.7055 | 0.81636 |
| XP_022013183.1  | XP_022029738.1 | 1.2317 | 1.5083 | 0.81661 |
| XP_021973855.1  | XP_022009213.1 | 1.6838 | 2.0609 | 0.81702 |
| XP_021987458.1  | XP_022021912.1 | 1.2637 | 1.5465 | 0.81714 |
| XP_021993052.1  | XP_022010295.2 | 0.8503 | 1.0404 | 0.81728 |
| XP_022002419.1  | XP_022010919.1 | 1.0203 | 1.2482 | 0.81742 |
| XP_022029738.1  | XP_035842399.1 | 1.2821 | 1.5683 | 0.81751 |
| XP_021978842.1  | XP_022002419.1 | 1.1239 | 1.3742 | 0.81786 |
| XP_022013183.1  | XP_022013239.1 | 1.4496 | 1.7724 | 0.81787 |
| XP_021978807.1  | XP_022035384.1 | 1.5146 | 1.8511 | 0.81822 |
| XP_022001254.1  | XP_022018622.1 | 1.3667 | 1.6699 | 0.81843 |
| XP_022002419.1  | XP_022010295.2 | 0.6405 | 0.7824 | 0.81863 |
| XP_021993222.1  | XP_021995116.1 | 1.6018 | 1.9566 | 0.81867 |
| XP_022014870.1  | XP_022018622.1 | 1.2831 | 1.5673 | 0.81867 |
| XP_021969020.1  | XP_022039074.2 | 1.3637 | 1.6654 | 0.81884 |
| XP_021987457.1  | XP_022021912.1 | 1.2625 | 1.5416 | 0.81895 |
| XP_021981388.1  | XP_022008276.2 | 1.3499 | 1.6479 | 0.81916 |
| XP_022002415.1  | XP_022002421.1 | 0.1807 | 0.2205 | 0.8195  |
| XP_021993621.2  | XP_022021911.1 | 1.3508 | 1.6479 | 0.81971 |
| XP_021993621.2  | XP_022021913.1 | 1.3508 | 1.6479 | 0.81971 |
| XP_021993621.2  | XP_022021914.1 | 1.3508 | 1.6479 | 0.81971 |
| XP_021973855.1  | XP_021989733.1 | 1.8633 | 2.273  | 0.81975 |
| XP_022002421.1  | XP_022018622.1 | 0.9819 | 1.1974 | 0.82003 |
| XP_021995116.1  | XP_022001254.1 | 1.4371 | 1.752  | 0.82026 |
| XP_021987458.1  | XP_021993222.1 | 1.5838 | 1.9298 | 0.82071 |
| XP_021972810.1  | XP_035838717.1 | 1.1945 | 1.4542 | 0.82141 |
| XP_022039085.1  | XP_035835830.1 | 0.6222 | 0.7574 | 0.82149 |
| XP_022035552.1  | XP_022039085.1 | 1.192  | 1.4496 | 0.8223  |
| XP_022010292.1  | XP_022010919.1 | 0.8961 | 1.0888 | 0.82302 |
| XP_022002416.1  | XP_022026964.1 | 0.9545 | 1.1592 | 0.82341 |
| XP_021972810.1  | XP_021989733.1 | 1.2071 | 1.4659 | 0.82345 |
| XP_022002415.1  | XP_022013560.1 | 0.6273 | 0.7617 | 0.82355 |
| XP_021984766.1  | XP_021984981.2 | 0.8146 | 0.9886 | 0.82399 |
| XP_021972810.1  | XP_022002418.1 | 0.6424 | 0.7795 | 0.82412 |
| XP_021995117.1  | XP_022004455.1 | 1.0736 | 1.3027 | 0.82413 |
| XP_021987457.1  | XP_021989736.1 | 1.1622 | 1.4092 | 0.82472 |
| XP_022002419.1  | XP_035842399.1 | 1.2967 | 1.572  | 0.82487 |
| XP_021993622.1  | XP_022006668.1 | 1.498  | 1.8149 | 0.82539 |
| XP_021978807.1  | XP_021993622.1 | 1.4088 | 1.7065 | 0.82555 |
| XP_022010919.1  | XP_022029738.1 | 0.9627 | 1.1661 | 0.82557 |
| XP_021992525.1  | XP_022010294.1 | 1.1606 | 1.4056 | 0.8257  |
| XP_022013182.1  | XP_035833070.1 | 1.5626 | 1.8915 | 0.82612 |
| XP_021988953.1  | XP_021992525.1 | 1.1764 | 1.4236 | 0.82636 |
| XP_022021914.1  | XP_022022835.1 | 1.4418 | 1.7443 | 0.82658 |
| XP_021973316.1  | XP_022010292.1 | 1.1497 | 1.3909 | 0.82659 |
| XP_021993283.1  | XP_022034230.1 | 1.5815 | 1.9129 | 0.82676 |
| XP_022004979.1  | XP_035838717.1 | 1.165  | 1.4091 | 0.82677 |
| XP_022010295.2  | XP_022013239.1 | 1.0031 | 1.213  | 0.82696 |
| XP_021987458.1  | XP_021993620.1 | 1.0296 | 1.2447 | 0.82719 |
| XP_021992525.1  | XP_022005608.1 | 1.2776 | 1.5443 | 0.8273  |
| XP_021985239.1  | XP_022008276.2 | 1.2704 | 1.5353 | 0.82746 |
| XP_021993620.1  | XP_022004980.1 | 1.5367 | 1.8567 | 0.82765 |
| XP_021972810.1  | XP_021981388.1 | 1.15   | 1.3893 | 0.82775 |
| XP_021993551.1  | XP_022010616.1 | 1.7094 | 2.0645 | 0.828   |
| XP_021989736.1  | XP_022008275.1 | 1.1255 | 1.3587 | 0.82837 |
| XP_022002420.1  | XP_035833070.1 | 1.2468 | 1.5034 | 0.82932 |
| XP_021993551.1  | XP_022021913.1 | 1.3992 | 1.6857 | 0.83004 |
| XP_021993551.1  | XP_022021914.1 | 1.3992 | 1.6857 | 0.83004 |
| XP_0220000224.2 | XP_022002418.1 | 0.8283 | 0.9978 | 0.83013 |
| XP_022010291.1  | XP_022022835.1 | 1.0407 | 1.2535 | 0.83024 |
| XP_021989735.1  | XP_022010295.2 | 1.1353 | 1.3674 | 0.83026 |
| XP_022010291.1  | XP_022021912.1 | 1.4066 | 1.6938 | 0.83044 |

|                               |        |        |         |
|-------------------------------|--------|--------|---------|
| XP_021972810.1 XP_022029740.1 | 0.6771 | 0.8153 | 0.83049 |
| XP_021978842.1 XP_022010291.1 | 1.0967 | 1.3205 | 0.83052 |
| XP_021993283.1 XP_022010296.1 | 1.3687 | 1.6479 | 0.83057 |
| XP_021988229.1 XP_022004980.1 | 1.3889 | 1.6722 | 0.83058 |
| XP_021973011.1 XP_022000224.2 | 1.1504 | 1.3844 | 0.83097 |
| XP_022002421.1 XP_022013560.1 | 0.6604 | 0.7947 | 0.83101 |
| XP_021978807.1 XP_022002416.1 | 1.0018 | 1.205  | 0.83137 |
| XP_021993551.1 XP_022021911.1 | 1.3841 | 1.6647 | 0.83144 |
| XP_021993052.1 XP_021999258.1 | 1.2463 | 1.4987 | 0.83159 |
| XP_021981388.1 XP_022006926.1 | 1.5427 | 1.8547 | 0.83178 |
| XP_021993621.2 XP_022002418.1 | 0.9697 | 1.1653 | 0.83215 |
| XP_021973854.1 XP_022021911.1 | 1.7174 | 2.0631 | 0.83244 |
| XP_021973854.1 XP_021993222.1 | 1.7268 | 2.0743 | 0.83247 |
| XP_022039085.1 XP_035842399.1 | 1.4293 | 1.7165 | 0.83268 |
| XP_022009213.1 XP_022010291.1 | 1.158  | 1.3903 | 0.83291 |
| XP_021976022.1 XP_021989733.1 | 1.1852 | 1.4227 | 0.83306 |
| XP_021984766.1 XP_022010291.1 | 1.245  | 1.4938 | 0.83344 |
| XP_022010295.2 XP_022026964.1 | 0.8637 | 1.0356 | 0.83401 |
| XP_022013239.1 XP_022035384.1 | 1.5109 | 1.8115 | 0.83406 |
| XP_021981626.1 XP_021993220.1 | 1.3983 | 1.6761 | 0.83426 |
| XP_022002415.1 XP_022010295.2 | 0.5604 | 0.6717 | 0.8343  |
| XP_021978807.1 XP_022000196.1 | 1.2889 | 1.5447 | 0.8344  |
| XP_022009213.1 XP_022029622.1 | 1.3527 | 1.6208 | 0.83459 |
| XP_021978807.1 XP_022002420.1 | 1.0355 | 1.2406 | 0.83468 |
| XP_022006327.1 XP_022013183.1 | 1.2276 | 1.4706 | 0.83476 |
| XP_022009213.1 XP_022010296.1 | 1.0166 | 1.2178 | 0.83478 |
| XP_022006927.1 XP_022037775.1 | 1.0295 | 1.2332 | 0.83482 |
| XP_022004980.1 XP_022013558.1 | 1.0953 | 1.3115 | 0.83515 |
| XP_022022487.2 XP_022035384.1 | 1.5904 | 1.9039 | 0.83534 |
| XP_021976022.1 XP_021995117.1 | 1.2526 | 1.4995 | 0.83535 |
| XP_022006927.1 XP_022039085.1 | 1.0566 | 1.2648 | 0.83539 |
| XP_021972810.1 XP_021978807.1 | 1.0726 | 1.2839 | 0.83542 |
| XP_021973011.1 XP_022010294.1 | 1.0372 | 1.2411 | 0.83571 |
| XP_021978807.1 XP_022021913.1 | 1.2037 | 1.4397 | 0.83608 |
| XP_021978807.1 XP_022021914.1 | 1.2037 | 1.4397 | 0.83608 |
| XP_021993621.2 XP_022014870.1 | 1.3942 | 1.6675 | 0.8361  |
| XP_022026964.1 XP_022034230.1 | 1.2709 | 1.5195 | 0.83639 |
| XP_021978807.1 XP_021999258.1 | 1.3541 | 1.6186 | 0.83659 |
| XP_021988953.1 XP_022037775.1 | 1.3012 | 1.555  | 0.83678 |
| XP_021992525.1 XP_022013183.1 | 0.3048 | 0.3642 | 0.8369  |
| XP_021992525.1 XP_035842399.1 | 1.5094 | 1.8034 | 0.83697 |
| XP_021993221.1 XP_022021912.1 | 1.5067 | 1.8    | 0.83706 |
| XP_021981388.1 XP_022037775.1 | 1.2652 | 1.5112 | 0.83722 |
| XP_021973316.1 XP_021987457.1 | 1.4197 | 1.6956 | 0.83728 |
| XP_021976022.1 XP_022010292.1 | 1.1809 | 1.4103 | 0.83734 |
| XP_021989733.1 XP_022022487.2 | 1.3151 | 1.5704 | 0.83743 |
| XP_022002420.1 XP_022013239.1 | 0.9762 | 1.1655 | 0.83758 |
| XP_021989737.1 XP_022006927.1 | 1.2821 | 1.5307 | 0.83759 |
| XP_021981407.1 XP_022037775.1 | 1.2673 | 1.5128 | 0.83772 |
| XP_021987457.1 XP_022002418.1 | 1.1788 | 1.4069 | 0.83787 |
| XP_021973316.1 XP_021993220.1 | 1.3928 | 1.6623 | 0.83788 |
| XP_021993283.1 XP_021999258.1 | 1.4119 | 1.6846 | 0.83812 |
| XP_021988229.1 XP_022021912.1 | 1.2718 | 1.5174 | 0.83814 |
| XP_022018622.1 XP_022034230.1 | 1.2421 | 1.4815 | 0.83841 |
| XP_021999258.1 XP_022021912.1 | 1.3593 | 1.6211 | 0.8385  |
| XP_022001254.1 XP_022033162.1 | 1.1814 | 1.4089 | 0.83853 |
| XP_021995116.1 XP_022022835.1 | 1.3857 | 1.6525 | 0.83855 |
| XP_022000196.1 XP_035835830.1 | 1.1042 | 1.3165 | 0.83874 |
| XP_021968895.1 XP_021993221.1 | 1.297  | 1.5463 | 0.83878 |
| XP_021969020.1 XP_021973011.1 | 1.5864 | 1.8912 | 0.83883 |
| XP_021985239.1 XP_022006927.1 | 1.2934 | 1.5419 | 0.83884 |
| XP_021987458.1 XP_022035384.1 | 1.7469 | 2.0824 | 0.83889 |
| XP_021973011.1 XP_022010296.1 | 0.9649 | 1.1496 | 0.83934 |
| XP_022001254.1 XP_022026963.1 | 1.4234 | 1.6957 | 0.83942 |
| XP_021973316.1 XP_022000224.2 | 1.1962 | 1.425  | 0.83944 |
| XP_021981395.1 XP_022013239.1 | 1.2649 | 1.5068 | 0.83946 |
| XP_021986500.1 XP_021989734.1 | 0.9763 | 1.1629 | 0.83954 |
| XP_022033162.1 XP_035842399.1 | 1.2693 | 1.5119 | 0.83954 |
| XP_021972810.1 XP_022014870.1 | 1.1766 | 1.4012 | 0.83971 |
| XP_021993551.1 XP_022009213.1 | 1.3838 | 1.6479 | 0.83974 |
| XP_021978807.1 XP_022004455.1 | 1.0201 | 1.2144 | 0.84    |
| XP_022000224.2 XP_035838717.1 | 1.0455 | 1.2443 | 0.84023 |
| XP_021988229.1 XP_022013239.1 | 1.3774 | 1.6392 | 0.84029 |
| XP_022000196.1 XP_022039085.1 | 1.6142 | 1.92   | 0.84073 |
| XP_021988229.1 XP_022006926.1 | 1.0336 | 1.2293 | 0.8408  |
| XP_021981388.1 XP_022035552.1 | 1.0001 | 1.1894 | 0.84084 |
| XP_021978807.1 XP_022010919.1 | 1.3101 | 1.5576 | 0.8411  |
| XP_021993222.1 XP_022010919.1 | 1.3759 | 1.6358 | 0.84112 |
| XP_021993283.1 XP_035838717.1 | 1.5127 | 1.7984 | 0.84114 |
| XP_021981407.1 XP_021995116.1 | 1.3533 | 1.6075 | 0.84187 |
| XP_022010291.1 XP_035838717.1 | 1.1209 | 1.3314 | 0.8419  |
| XP_021993283.1 XP_022013182.1 | 1.5158 | 1.8003 | 0.84197 |
| XP_021988953.1 XP_022010296.1 | 1.1114 | 1.3199 | 0.84203 |
| XP_022006926.1 XP_022013183.1 | 1.5898 | 1.8875 | 0.84228 |
| XP_021972810.1 XP_022002419.1 | 0.5837 | 0.693  | 0.84228 |
| XP_022000196.1 XP_022002418.1 | 1.0258 | 1.2178 | 0.84234 |
| XP_021993222.1 XP_022035551.1 | 1.3793 | 1.6366 | 0.84278 |
| XP_022021911.1 XP_022022835.1 | 1.4433 | 1.7121 | 0.843   |

|                               |        |        |         |
|-------------------------------|--------|--------|---------|
| XP_021984981.2 XP_022004980.1 | 1.1636 | 1.3803 | 0.84301 |
| XP_021981395.1 XP_022009213.1 | 0.7244 | 0.8591 | 0.84321 |
| XP_021988953.1 XP_022010294.1 | 1.1596 | 1.3751 | 0.84328 |
| XP_021992525.1 XP_022015084.1 | 1.212  | 1.4372 | 0.84331 |
| XP_021987457.1 XP_022035384.1 | 1.7477 | 2.0716 | 0.84365 |
| XP_022004979.1 XP_022013182.1 | 1.2467 | 1.4777 | 0.84368 |
| XP_021973316.1 XP_022002421.1 | 1.0136 | 1.2011 | 0.84389 |
| XP_021989736.1 XP_022039085.1 | 1.1363 | 1.3464 | 0.84395 |
| XP_021993622.1 XP_022035384.1 | 1.6454 | 1.9493 | 0.8441  |
| XP_021981626.1 XP_022029622.1 | 1.4341 | 1.6978 | 0.84468 |
| XP_021987458.1 XP_022002418.1 | 1.1965 | 1.4165 | 0.84469 |
| XP_022021912.1 XP_022037775.1 | 1.2031 | 1.424  | 0.84487 |
| XP_021992525.1 XP_022034230.1 | 1.1836 | 1.4005 | 0.84513 |
| XP_021993551.1 XP_022004455.1 | 1.2017 | 1.4218 | 0.8452  |
| XP_021973316.1 XP_021995117.1 | 1.2185 | 1.4414 | 0.84536 |
| XP_021981407.1 XP_021999258.1 | 1.1004 | 1.3015 | 0.84549 |
| XP_021993551.1 XP_021999258.1 | 1.5294 | 1.8089 | 0.84549 |
| XP_022000196.1 XP_022018622.1 | 1.2747 | 1.5073 | 0.84568 |
| XP_021988229.1 XP_021999258.1 | 1.4179 | 1.6765 | 0.84575 |
| XP_022010101.1 XP_022014870.1 | 1.4108 | 1.6681 | 0.84575 |
| XP_022002416.1 XP_022010616.1 | 0.8563 | 1.0124 | 0.84581 |
| XP_022018622.1 XP_035838717.1 | 1.3449 | 1.5899 | 0.8459  |
| XP_021969020.1 XP_022021912.1 | 1.3171 | 1.5569 | 0.84598 |
| XP_022006926.1 XP_022034230.1 | 0.8116 | 0.959  | 0.8463  |
| XP_021973854.1 XP_022006927.1 | 1.3765 | 1.626  | 0.84656 |
| XP_021984981.2 XP_021987457.1 | 1.0925 | 1.2905 | 0.84657 |
| XP_021993551.1 XP_022034230.1 | 1.6076 | 1.8986 | 0.84673 |
| XP_022026964.1 XP_022033162.1 | 1.0616 | 1.2532 | 0.84711 |
| XP_022006327.1 XP_022022835.1 | 1.5611 | 1.8426 | 0.84723 |
| XP_022018622.1 XP_022029740.1 | 1.0088 | 1.1906 | 0.8473  |
| XP_021992525.1 XP_022039074.2 | 1.3779 | 1.6262 | 0.84731 |
| XP_021993622.1 XP_022002421.1 | 1.2366 | 1.4594 | 0.84733 |
| XP_021993220.1 XP_022029622.1 | 1.709  | 2.0169 | 0.84734 |
| XP_022006926.1 XP_022010616.1 | 1.1104 | 1.3102 | 0.8475  |
| XP_022018622.1 XP_022021911.1 | 1.0232 | 1.2071 | 0.84765 |
| XP_022014870.1 XP_035835830.1 | 1.1902 | 1.4039 | 0.84778 |
| XP_022002418.1 XP_022026964.1 | 0.9591 | 1.1313 | 0.84779 |
| XP_021995117.1 XP_022006327.1 | 1.3123 | 1.5476 | 0.84796 |
| XP_021989736.1 XP_022008276.2 | 1.4162 | 1.67   | 0.84802 |
| XP_022006668.1 XP_022021912.1 | 1.3263 | 1.5636 | 0.84823 |
| XP_021989734.1 XP_022039074.2 | 1.1134 | 1.3126 | 0.84824 |
| XP_021981388.1 XP_035838717.1 | 0.6625 | 0.781  | 0.84827 |
| XP_022002416.1 XP_022002421.1 | 0.1834 | 0.2162 | 0.84829 |
| XP_021993221.1 XP_022006926.1 | 1.2522 | 1.4753 | 0.84878 |
| XP_022006927.1 XP_022010101.1 | 0.5912 | 0.6965 | 0.84882 |
| XP_021984981.2 XP_021988953.1 | 1.2873 | 1.5163 | 0.84897 |
| XP_022014870.1 XP_022035551.1 | 0.9756 | 1.149  | 0.84909 |
| XP_022014870.1 XP_022035552.1 | 0.9756 | 1.149  | 0.84909 |
| XP_021988229.1 XP_022006927.1 | 1.1115 | 1.3089 | 0.84919 |
| XP_021987457.1 XP_022013239.1 | 1.4127 | 1.6634 | 0.84928 |
| XP_021993222.1 XP_035833070.1 | 1.3862 | 1.6318 | 0.84949 |
| XP_021976022.1 XP_021984766.1 | 1.3331 | 1.5692 | 0.84954 |
| XP_021981626.1 XP_022002418.1 | 0.9811 | 1.1546 | 0.84973 |
| XP_021993221.1 XP_022000196.1 | 1.4284 | 1.681  | 0.84973 |
| XP_021993621.2 XP_021993622.1 | 0.9354 | 1.1008 | 0.84975 |
| XP_021969020.1 XP_022006327.1 | 1.9165 | 2.2552 | 0.84981 |
| XP_022006668.1 XP_022029738.1 | 1.1943 | 1.4051 | 0.84998 |
| XP_022008276.2 XP_022013183.1 | 1.3567 | 1.596  | 0.85006 |
| XP_021981388.1 XP_021981407.1 | 0.2495 | 0.2935 | 0.85009 |
| XP_021976022.1 XP_021978842.1 | 1.2712 | 1.4953 | 0.85013 |
| XP_021969020.1 XP_022034230.1 | 1.4713 | 1.7302 | 0.85036 |
| XP_021976022.1 XP_021987457.1 | 1.5424 | 1.8136 | 0.85046 |
| XP_022022835.1 XP_035842399.1 | 1.6393 | 1.9275 | 0.85048 |
| XP_022039085.1 XP_035833070.1 | 1.5731 | 1.8496 | 0.85051 |
| XP_021984981.2 XP_021987458.1 | 1.1041 | 1.298  | 0.85062 |
| XP_021993221.1 XP_022010294.1 | 1.4019 | 1.6479 | 0.85072 |
| XP_022013182.1 XP_022021911.1 | 1.3985 | 1.6437 | 0.85082 |
| XP_021993052.1 XP_022013560.1 | 0.9468 | 1.1126 | 0.85098 |
| XP_021989737.1 XP_035835830.1 | 1.0194 | 1.1979 | 0.85099 |
| XP_021981626.1 XP_022000224.2 | 1.1708 | 1.3755 | 0.85118 |
| XP_021993621.2 XP_022001254.1 | 1.3608 | 1.5987 | 0.85119 |
| XP_021993283.1 XP_022010616.1 | 1.1887 | 1.3961 | 0.85144 |
| XP_022021913.1 XP_022022835.1 | 1.4665 | 1.7215 | 0.85187 |
| XP_021993551.1 XP_022029740.1 | 1.1714 | 1.3744 | 0.8523  |
| XP_022018622.1 XP_035842399.1 | 1.5786 | 1.852  | 0.85238 |
| XP_021973011.1 XP_021993283.1 | 1.5036 | 1.7635 | 0.85262 |
| XP_021981626.1 XP_021993222.1 | 1.505  | 1.7646 | 0.85288 |
| XP_021993621.2 XP_022002416.1 | 0.9586 | 1.1239 | 0.85292 |
| XP_021993621.2 XP_022002417.1 | 0.9586 | 1.1239 | 0.85292 |
| XP_021999258.1 XP_022001254.1 | 1.5503 | 1.8172 | 0.85313 |
| XP_021993551.1 XP_022000196.1 | 1.3762 | 1.613  | 0.85319 |
| XP_022035384.1 XP_035833070.1 | 1.9719 | 2.3111 | 0.85323 |
| XP_021988229.1 XP_022010919.1 | 1.1538 | 1.3521 | 0.85334 |
| XP_021989735.1 XP_022022487.2 | 1.2554 | 1.4706 | 0.85367 |
| XP_022008276.2 XP_022013182.1 | 1.3474 | 1.5781 | 0.85381 |
| XP_022013182.1 XP_022037775.1 | 1.3971 | 1.6363 | 0.85382 |
| XP_022010294.1 XP_022022835.1 | 1.0831 | 1.2678 | 0.85431 |
| XP_021989735.1 XP_022029622.1 | 1.2562 | 1.47   | 0.85456 |



|                |                |        |        |         |
|----------------|----------------|--------|--------|---------|
| XP_021995116.1 | XP_022004980.1 | 1.3769 | 1.6103 | 0.85506 |
| XP_021981395.1 | XP_021989735.1 | 0.4371 | 0.5109 | 0.85555 |
| XP_021973316.1 | XP_022014870.1 | 1.1657 | 1.3623 | 0.85569 |
| XP_021981388.1 | XP_022006327.1 | 1.4939 | 1.7443 | 0.85645 |
| XP_021985239.1 | XP_022021912.1 | 1.2354 | 1.4423 | 0.85655 |
| XP_021993551.1 | XP_022039085.1 | 1.3591 | 1.5856 | 0.85715 |
| XP_022018622.1 | XP_022029738.1 | 0.9539 | 1.1127 | 0.85728 |
| XP_021988953.1 | XP_022029740.1 | 1.1239 | 1.3108 | 0.85742 |
| XP_021993220.1 | XP_022039074.2 | 1.3955 | 1.6275 | 0.85745 |
| XP_022002417.1 | XP_022010616.1 | 0.8585 | 1.001  | 0.85764 |
| XP_022021912.1 | XP_022029740.1 | 1.3241 | 1.5434 | 0.85791 |
| XP_021993221.1 | XP_021999258.1 | 1.2629 | 1.472  | 0.85795 |
| XP_021995116.1 | XP_022034230.1 | 1.4908 | 1.7371 | 0.85821 |
| XP_022000196.1 | XP_022002420.1 | 1.0938 | 1.2745 | 0.85822 |
| XP_022004979.1 | XP_022026964.1 | 1.0321 | 1.2023 | 0.85844 |
| XP_022002418.1 | XP_035842399.1 | 1.1379 | 1.3246 | 0.85905 |
| XP_022010294.1 | XP_022010919.1 | 0.9763 | 1.1363 | 0.85919 |
| XP_021989733.1 | XP_021989736.1 | 0.1796 | 0.209  | 0.85933 |
| XP_021986500.1 | XP_022029738.1 | 0.89   | 1.0356 | 0.85941 |
| XP_021993283.1 | XP_022000196.1 | 1.7269 | 2.0093 | 0.85945 |
| XP_022002419.1 | XP_022002421.1 | 0.1739 | 0.2023 | 0.85961 |
| XP_022008275.1 | XP_022035551.1 | 1.3071 | 1.5199 | 0.85999 |
| XP_021976022.1 | XP_022029738.1 | 1.203  | 1.3986 | 0.86015 |
| XP_022008276.2 | XP_022022487.2 | 1.6215 | 1.8842 | 0.86058 |
| XP_022009213.1 | XP_022021913.1 | 1.2668 | 1.4714 | 0.86095 |
| XP_022009213.1 | XP_022021914.1 | 1.2668 | 1.4714 | 0.86095 |
| XP_021992525.1 | XP_022010295.2 | 1.3738 | 1.5956 | 0.86099 |
| XP_021989733.1 | XP_022022835.1 | 1.2602 | 1.4635 | 0.86109 |
| XP_022009213.1 | XP_022021911.1 | 1.2617 | 1.4651 | 0.86117 |
| XP_021972810.1 | XP_022000196.1 | 1.3713 | 1.592  | 0.86137 |
| XP_021984766.1 | XP_035838717.1 | 0.9872 | 1.1458 | 0.86158 |
| XP_021973855.1 | XP_021993052.1 | 1.5503 | 1.7984 | 0.86204 |
| XP_021993052.1 | XP_022039074.2 | 1.0879 | 1.262  | 0.86204 |
| XP_021992525.1 | XP_022021911.1 | 1.4371 | 1.6666 | 0.86229 |
| XP_021989735.1 | XP_022029740.1 | 1.2686 | 1.4709 | 0.86247 |
| XP_021993220.1 | XP_022000196.1 | 1.5186 | 1.7607 | 0.8625  |
| XP_021973854.1 | XP_022000224.2 | 1.0745 | 1.2454 | 0.86278 |
| XP_022021912.1 | XP_022033162.1 | 1.2336 | 1.4291 | 0.8632  |
| XP_021976022.1 | XP_021988229.1 | 1.3432 | 1.5557 | 0.86341 |
| XP_022002419.1 | XP_022013239.1 | 1.0228 | 1.1845 | 0.86349 |
| XP_021993221.1 | XP_022008275.1 | 1.3759 | 1.5933 | 0.86355 |
| XP_022002416.1 | XP_035842399.1 | 1.1341 | 1.3132 | 0.86362 |
| XP_022006668.1 | XP_022006926.1 | 1.1786 | 1.3646 | 0.8637  |
| XP_022039074.2 | XP_035838717.1 | 1.1674 | 1.3511 | 0.86404 |
| XP_021986500.1 | XP_021993621.2 | 1.3763 | 1.5927 | 0.86413 |
| XP_021981388.1 | XP_022035551.1 | 0.9953 | 1.1517 | 0.8642  |
| XP_021981626.1 | XP_022006927.1 | 1.4112 | 1.632  | 0.86471 |
| XP_021976022.1 | XP_022009213.1 | 1.2118 | 1.4013 | 0.86477 |
| XP_021999258.1 | XP_022029738.1 | 1.2413 | 1.4352 | 0.8649  |
| XP_021968895.1 | XP_021981407.1 | 1.2658 | 1.4633 | 0.86503 |
| XP_021973316.1 | XP_021987458.1 | 1.4295 | 1.6525 | 0.86505 |
| XP_021988229.1 | XP_022039074.2 | 0.8684 | 1.0028 | 0.86598 |
| XP_021972810.1 | XP_021993222.1 | 1.5275 | 1.7635 | 0.86618 |
| XP_022006926.1 | XP_022021911.1 | 1.7357 | 2.0033 | 0.86642 |
| XP_022002415.1 | XP_022029739.1 | 0.445  | 0.5134 | 0.86677 |
| XP_021981626.1 | XP_022035552.1 | 1.3012 | 1.5009 | 0.86695 |
| XP_021999258.1 | XP_022013560.1 | 1.2045 | 1.3893 | 0.86698 |
| XP_021993621.2 | XP_022002415.1 | 0.9952 | 1.1475 | 0.86728 |
| XP_022013182.1 | XP_022021913.1 | 1.4262 | 1.644  | 0.86752 |
| XP_021981407.1 | XP_022006327.1 | 1.5363 | 1.7709 | 0.86752 |
| XP_021985239.1 | XP_022026964.1 | 1.1918 | 1.3733 | 0.86784 |
| XP_021992525.1 | XP_021993052.1 | 1.4486 | 1.6683 | 0.86831 |
| XP_021993621.2 | XP_022000196.1 | 1.4882 | 1.7139 | 0.86831 |
| XP_021993551.1 | XP_022002420.1 | 1.1288 | 1.2998 | 0.86844 |
| XP_021976022.1 | XP_022022835.1 | 1.3076 | 1.5056 | 0.86849 |
| XP_021973316.1 | XP_021989735.1 | 1.3031 | 1.5001 | 0.86868 |
| XP_021993283.1 | XP_022021912.1 | 1.7598 | 2.0254 | 0.86887 |
| XP_022002417.1 | XP_022029740.1 | 0.399  | 0.4591 | 0.86909 |
| XP_021999258.1 | XP_022026964.1 | 1.5241 | 1.7532 | 0.86932 |
| XP_021993551.1 | XP_022039074.2 | 1.3373 | 1.5382 | 0.86939 |
| XP_022033162.1 | XP_022035551.1 | 1.8589 | 2.1379 | 0.8695  |
| XP_022033162.1 | XP_022035552.1 | 1.8589 | 2.1379 | 0.8695  |
| XP_022006926.1 | XP_035833070.1 | 1.2309 | 1.4153 | 0.86971 |
| XP_021989734.1 | XP_022008276.2 | 1.2929 | 1.4863 | 0.86988 |
| XP_022013560.1 | XP_022039074.2 | 0.8175 | 0.9396 | 0.87005 |
| XP_021993551.1 | XP_022022835.1 | 1.2635 | 1.452  | 0.87018 |
| XP_021989737.1 | XP_021995116.1 | 1.256  | 1.4426 | 0.87065 |
| XP_021995117.1 | XP_022010919.1 | 1.2583 | 1.4447 | 0.87098 |
| XP_021989737.1 | XP_035838717.1 | 0.7256 | 0.8328 | 0.87128 |
| XP_021968895.1 | XP_021984766.1 | 1.2385 | 1.4214 | 0.87132 |
| XP_022013239.1 | XP_022034230.1 | 1.3674 | 1.569  | 0.87151 |
| XP_022000224.2 | XP_022009213.1 | 1.0787 | 1.237  | 0.87203 |
| XP_021988953.1 | XP_022039085.1 | 1.2899 | 1.4788 | 0.87226 |
| XP_022026964.1 | XP_035838717.1 | 1.2013 | 1.3772 | 0.87228 |
| XP_021999258.1 | XP_035833070.1 | 1.7222 | 1.9742 | 0.87235 |
| XP_021987458.1 | XP_022037775.1 | 1.6027 | 1.8369 | 0.8725  |
| XP_021999258.1 | XP_022021911.1 | 1.407  | 1.6123 | 0.87267 |
| XP_021999258.1 | XP_022021913.1 | 1.407  | 1.6123 | 0.87267 |

|                               |        |        |         |
|-------------------------------|--------|--------|---------|
| XP_021999258.1 XP_022021914.1 | 1.407  | 1.6123 | 0.87267 |
| XP_021984766.1 XP_021999258.1 | 1.1786 | 1.3499 | 0.8731  |
| XP_021973854.1 XP_021981388.1 | 1.5636 | 1.7895 | 0.87376 |
| XP_022004980.1 XP_022015084.1 | 1.2316 | 1.4095 | 0.87379 |
| XP_021981626.1 XP_022005608.1 | 1.078  | 1.2332 | 0.87415 |
| XP_021985239.1 XP_022005608.1 | 1.1037 | 1.2624 | 0.87429 |
| XP_022021912.1 XP_022026963.1 | 1.5805 | 1.8075 | 0.87441 |
| XP_021978842.1 XP_022002416.1 | 1.1113 | 1.2709 | 0.87442 |
| XP_022010919.1 XP_022033162.1 | 1.5329 | 1.753  | 0.87444 |
| XP_021992525.1 XP_022004979.1 | 1.3832 | 1.5817 | 0.8745  |
| XP_022002420.1 XP_035842399.1 | 1.1101 | 1.269  | 0.87478 |
| XP_022009213.1 XP_022035551.1 | 1.1656 | 1.3322 | 0.87494 |
| XP_022004980.1 XP_022026964.1 | 1.3178 | 1.5053 | 0.87544 |
| XP_021993622.1 XP_022029739.1 | 1.4944 | 1.7065 | 0.87571 |
| XP_022009213.1 XP_022026964.1 | 1.19   | 1.3584 | 0.87603 |
| XP_021992525.1 XP_022035384.1 | 1.3079 | 1.4926 | 0.87626 |
| XP_022022487.2 XP_022039074.2 | 1.2574 | 1.4347 | 0.87642 |
| XP_022022835.1 XP_022033162.1 | 1.3791 | 1.5733 | 0.87657 |
| XP_021978807.1 XP_022021911.1 | 1.1994 | 1.3681 | 0.87669 |
| XP_021987458.1 XP_022013558.1 | 1.3135 | 1.498  | 0.87684 |
| XP_022004979.1 XP_022004980.1 | 0.8773 | 1.0005 | 0.87686 |
| XP_021988229.1 XP_022018622.1 | 1.4611 | 1.6662 | 0.87691 |
| XP_021988953.1 XP_022029739.1 | 1.167  | 1.3305 | 0.87711 |
| XP_021973854.1 XP_022002418.1 | 1.167  | 1.3296 | 0.87771 |
| XP_022002416.1 XP_022029740.1 | 0.3851 | 0.4387 | 0.87782 |
| XP_022010919.1 XP_022014870.1 | 1.2683 | 1.4447 | 0.8779  |
| XP_021973316.1 XP_022022835.1 | 1.2599 | 1.4348 | 0.8781  |
| XP_022026964.1 XP_022039074.2 | 1.065  | 1.2126 | 0.87828 |
| XP_021995117.1 XP_022013239.1 | 1.2887 | 1.467  | 0.87846 |
| XP_021976022.1 XP_035838717.1 | 1.2391 | 1.4104 | 0.87855 |
| XP_022009213.1 XP_022035552.1 | 1.1629 | 1.3236 | 0.87859 |
| XP_021987457.1 XP_021993620.1 | 1.0379 | 1.1812 | 0.87868 |
| XP_021973854.1 XP_022029739.1 | 1.3253 | 1.5082 | 0.87873 |
| XP_021989737.1 XP_022039085.1 | 1.2402 | 1.4113 | 0.87876 |
| XP_021987457.1 XP_022002415.1 | 1.1991 | 1.3645 | 0.87878 |
| XP_022029622.1 XP_022037775.1 | 1.096  | 1.2468 | 0.87905 |
| XP_021989734.1 XP_021993220.1 | 1.5503 | 1.7635 | 0.8791  |
| XP_021989733.1 XP_022013239.1 | 1.4419 | 1.6393 | 0.87958 |
| XP_021973011.1 XP_022035551.1 | 1.4446 | 1.6422 | 0.87967 |
| XP_021973011.1 XP_022035552.1 | 1.4446 | 1.6422 | 0.87967 |
| XP_021993220.1 XP_022021912.1 | 1.8047 | 2.0514 | 0.87974 |
| XP_021973855.1 XP_022010919.1 | 1.3539 | 1.5381 | 0.88024 |
| XP_022021913.1 XP_022029740.1 | 1.2716 | 1.4444 | 0.88037 |
| XP_022021914.1 XP_022029740.1 | 1.2716 | 1.4444 | 0.88037 |
| XP_021989737.1 XP_021993222.1 | 1.4433 | 1.6393 | 0.88044 |
| XP_021976022.1 XP_022013239.1 | 1.4582 | 1.6556 | 0.88077 |
| XP_022035384.1 XP_022037775.1 | 1.2243 | 1.3895 | 0.88111 |
| XP_021976022.1 XP_022034230.1 | 1.7521 | 1.9883 | 0.88121 |
| XP_021989733.1 XP_022035384.1 | 1.1863 | 1.3462 | 0.88122 |
| XP_022021911.1 XP_022029740.1 | 1.2546 | 1.4235 | 0.88135 |
| XP_022010101.1 XP_022022835.1 | 1.4986 | 1.6994 | 0.88184 |
| XP_022013182.1 XP_022021914.1 | 1.4392 | 1.6317 | 0.88202 |
| XP_021981395.1 XP_022035552.1 | 1.1123 | 1.2608 | 0.88222 |
| XP_021989733.1 XP_022039085.1 | 1.2945 | 1.4673 | 0.88223 |
| XP_021993220.1 XP_021993222.1 | 1.0877 | 1.2328 | 0.8823  |
| XP_022029739.1 XP_022035384.1 | 1.4991 | 1.6988 | 0.88245 |
| XP_022013183.1 XP_022037775.1 | 1.372  | 1.5547 | 0.88249 |
| XP_021992525.1 XP_022022835.1 | 1.2392 | 1.404  | 0.88262 |
| XP_021989734.1 XP_022006927.1 | 1.2194 | 1.3813 | 0.88279 |
| XP_021988953.1 XP_021995117.1 | 1.3511 | 1.5304 | 0.88284 |
| XP_021988953.1 XP_021993620.1 | 1.2818 | 1.4511 | 0.88333 |
| XP_022006327.1 XP_022010296.1 | 1.2345 | 1.3974 | 0.88343 |
| XP_021978842.1 XP_021993220.1 | 1.4209 | 1.608  | 0.88364 |
| XP_021968895.1 XP_021978807.1 | 1.1054 | 1.2509 | 0.88368 |
| XP_021987458.1 XP_022015084.1 | 1.0704 | 1.2102 | 0.88448 |
| XP_022004980.1 XP_022010291.1 | 1.3809 | 1.5612 | 0.88451 |
| XP_021972810.1 XP_021993551.1 | 1.2778 | 1.4436 | 0.88515 |
| XP_021973854.1 XP_021993220.1 | 1.4894 | 1.6826 | 0.88518 |
| XP_021978842.1 XP_022018622.1 | 1.3086 | 1.4783 | 0.88521 |
| XP_021993283.1 XP_022002419.1 | 1.2384 | 1.3988 | 0.88533 |
| XP_021972810.1 XP_022029739.1 | 0.814  | 0.9194 | 0.88536 |
| XP_022010291.1 XP_022022487.2 | 1.1913 | 1.3455 | 0.8854  |
| XP_021973316.1 XP_022010291.1 | 1.2326 | 1.392  | 0.88549 |
| XP_021999258.1 XP_022010294.1 | 1.1743 | 1.3259 | 0.88566 |
| XP_021984766.1 XP_022010296.1 | 0.9961 | 1.1246 | 0.88574 |
| XP_021987458.1 XP_022002415.1 | 1.2173 | 1.374  | 0.88595 |
| XP_021973855.1 XP_022037775.1 | 1.6617 | 1.8756 | 0.88596 |
| XP_022010292.1 XP_022021911.1 | 1.3246 | 1.4941 | 0.88655 |
| XP_022010292.1 XP_022021913.1 | 1.3246 | 1.4941 | 0.88655 |
| XP_022010292.1 XP_022021914.1 | 1.3246 | 1.4941 | 0.88655 |
| XP_022002417.1 XP_022013239.1 | 1.0813 | 1.2192 | 0.88689 |
| XP_021984981.2 XP_021986500.1 | 1.1318 | 1.2753 | 0.88748 |
| XP_021973855.1 XP_021993283.1 | 2.0738 | 2.3367 | 0.88749 |
| XP_021993551.1 XP_035833070.1 | 1.9348 | 2.1793 | 0.88781 |
| XP_021987457.1 XP_022010295.2 | 1.3117 | 1.4772 | 0.88796 |
| XP_021993221.1 XP_022039074.2 | 1.154  | 1.2995 | 0.88803 |
| XP_021987457.1 XP_022015084.1 | 1.0834 | 1.2196 | 0.88832 |
| XP_021993621.2 XP_021995116.1 | 0.6285 | 0.7072 | 0.88872 |

|                |                |        |        |         |
|----------------|----------------|--------|--------|---------|
| XP_022026963.1 | XP_035833070.1 | 1.5206 | 1.7095 | 0.8895  |
| XP_022005608.1 | XP_022022835.1 | 1.1828 | 1.3295 | 0.88966 |
| XP_021993222.1 | XP_022004979.1 | 1.4952 | 1.68   | 0.89    |
| XP_021986500.1 | XP_022029622.1 | 1.1468 | 1.2882 | 0.89023 |
| XP_022006668.1 | XP_022013182.1 | 1.2911 | 1.4501 | 0.89035 |
| XP_021973855.1 | XP_021995116.1 | 1.7297 | 1.9427 | 0.89036 |
| XP_021984981.2 | XP_021989736.1 | 0.7907 | 0.888  | 0.89043 |
| XP_022002415.1 | XP_022029740.1 | 0.3674 | 0.4126 | 0.89045 |
| XP_022021912.1 | XP_022039085.1 | 1.3842 | 1.5539 | 0.89079 |
| XP_021973316.1 | XP_022008275.1 | 1.6434 | 1.8445 | 0.89097 |
| XP_021993283.1 | XP_022006926.1 | 1.422  | 1.5956 | 0.8912  |
| XP_021972810.1 | XP_022002421.1 | 0.6313 | 0.7079 | 0.89179 |
| XP_021976022.1 | XP_021987458.1 | 1.4778 | 1.6571 | 0.8918  |
| XP_021999258.1 | XP_022004980.1 | 1.4701 | 1.6479 | 0.89211 |
| XP_021999258.1 | XP_022006926.1 | 1.2854 | 1.4397 | 0.89282 |
| XP_021993622.1 | XP_022022835.1 | 1.7201 | 1.9255 | 0.89333 |
| XP_021999258.1 | XP_022035552.1 | 1.3168 | 1.4736 | 0.89359 |
| XP_021985239.1 | XP_035833070.1 | 1.2352 | 1.382  | 0.89378 |
| XP_021972810.1 | XP_022002417.1 | 0.685  | 0.7664 | 0.89379 |
| XP_021973855.1 | XP_022013239.1 | 1.8142 | 2.029  | 0.89414 |
| XP_022004980.1 | XP_022010296.1 | 1.1107 | 1.2419 | 0.89436 |
| XP_021981626.1 | XP_022035551.1 | 1.3219 | 1.4778 | 0.89451 |
| XP_021972810.1 | XP_021989734.1 | 1.3379 | 1.4948 | 0.89504 |
| XP_021973854.1 | XP_022010296.1 | 1.275  | 1.4245 | 0.89505 |
| XP_021973316.1 | XP_022010294.1 | 1.1013 | 1.2304 | 0.89507 |
| XP_021978807.1 | XP_022002417.1 | 1.0058 | 1.1236 | 0.89516 |
| XP_021993620.1 | XP_022013239.1 | 0.8293 | 0.9263 | 0.89528 |
| XP_021978842.1 | XP_022029739.1 | 1.1292 | 1.2611 | 0.89541 |
| XP_021981626.1 | XP_021999258.1 | 1.6693 | 1.8637 | 0.89569 |
| XP_021978807.1 | XP_022010101.1 | 1.0001 | 1.1161 | 0.89607 |
| XP_021992525.1 | XP_022029740.1 | 1.3484 | 1.5041 | 0.89648 |
| XP_021987457.1 | XP_021999258.1 | 1.5532 | 1.7324 | 0.89656 |
| XP_021984766.1 | XP_021986500.1 | 1.2834 | 1.4313 | 0.89667 |
| XP_021972810.1 | XP_022021912.1 | 1.3281 | 1.4811 | 0.8967  |
| XP_021992525.1 | XP_022021914.1 | 1.4666 | 1.6345 | 0.89728 |
| XP_021993551.1 | XP_022004980.1 | 1.5677 | 1.7459 | 0.89793 |
| XP_021973855.1 | XP_021993622.1 | 2.3554 | 2.6224 | 0.89818 |
| XP_021989735.1 | XP_022006927.1 | 1.1762 | 1.3089 | 0.89862 |
| XP_022009213.1 | XP_022018622.1 | 1.3456 | 1.4972 | 0.89874 |
| XP_022002421.1 | XP_022006327.1 | 1.2528 | 1.3938 | 0.89884 |
| XP_021988229.1 | XP_022021911.1 | 1.252  | 1.3927 | 0.89897 |
| XP_021993551.1 | XP_022006927.1 | 1.6509 | 1.8361 | 0.89913 |
| XP_021984981.2 | XP_021993222.1 | 1.6316 | 1.8125 | 0.90019 |
| XP_021985239.1 | XP_021989736.1 | 1.1921 | 1.3241 | 0.90031 |
| XP_021981407.1 | XP_021988953.1 | 1.2581 | 1.3971 | 0.90051 |
| XP_022002418.1 | XP_022029738.1 | 0.5282 | 0.5865 | 0.9006  |
| XP_021972810.1 | XP_021995117.1 | 1.148  | 1.2745 | 0.90075 |
| XP_021986500.1 | XP_022008276.2 | 1.0606 | 1.177  | 0.9011  |
| XP_022002415.1 | XP_022010616.1 | 0.8671 | 0.9619 | 0.90145 |
| XP_021993622.1 | XP_022010296.1 | 1.4179 | 1.5729 | 0.90146 |
| XP_021973855.1 | XP_022026963.1 | 1.7569 | 1.9487 | 0.90158 |
| XP_021981395.1 | XP_021992525.1 | 1.0582 | 1.1729 | 0.90221 |
| XP_021976022.1 | XP_021984981.2 | 1.3683 | 1.5165 | 0.90227 |
| XP_021973855.1 | XP_022021913.1 | 1.7224 | 1.9085 | 0.90249 |
| XP_021973855.1 | XP_022021914.1 | 1.7224 | 1.9085 | 0.90249 |
| XP_021973316.1 | XP_022006927.1 | 1.4676 | 1.6247 | 0.90331 |
| XP_021973855.1 | XP_022021911.1 | 1.6778 | 1.8572 | 0.9034  |
| XP_021993052.1 | XP_022006668.1 | 1.0907 | 1.2071 | 0.90357 |
| XP_021985239.1 | XP_022013558.1 | 0.8817 | 0.9753 | 0.90403 |
| XP_021973316.1 | XP_022013558.1 | 1.1184 | 1.2369 | 0.9042  |
| XP_022029622.1 | XP_022029740.1 | 1.1121 | 1.2296 | 0.90444 |
| XP_021984766.1 | XP_022039074.2 | 1.2716 | 1.4056 | 0.90467 |
| XP_021973855.1 | XP_022039074.2 | 1.7623 | 1.9476 | 0.90486 |
| XP_021973855.1 | XP_022006926.1 | 1.6136 | 1.7824 | 0.9053  |
| XP_021988229.1 | XP_022034230.1 | 1.233  | 1.3617 | 0.90549 |
| XP_022000224.2 | XP_022026963.1 | 1.365  | 1.5073 | 0.90559 |
| XP_021968895.1 | XP_021993052.1 | 1.0317 | 1.1392 | 0.90564 |
| XP_021989737.1 | XP_022000196.1 | 1.2346 | 1.3632 | 0.90566 |
| XP_022001254.1 | XP_022026964.1 | 1.2702 | 1.4019 | 0.90606 |
| XP_021978842.1 | XP_022002418.1 | 1.1278 | 1.2441 | 0.90652 |
| XP_021984766.1 | XP_035842399.1 | 1.4365 | 1.5846 | 0.90654 |
| XP_022018622.1 | XP_022035551.1 | 1.6603 | 1.831  | 0.90677 |
| XP_022018622.1 | XP_022035552.1 | 1.6603 | 1.831  | 0.90677 |
| XP_021972810.1 | XP_021989735.1 | 1.2356 | 1.3626 | 0.9068  |
| XP_021993622.1 | XP_022013558.1 | 1.3665 | 1.5055 | 0.90767 |
| XP_022015084.1 | XP_035842399.1 | 1.6174 | 1.7812 | 0.90804 |
| XP_021992525.1 | XP_022010296.1 | 1.2968 | 1.4276 | 0.90838 |
| XP_021978807.1 | XP_022002419.1 | 0.9962 | 1.096  | 0.90894 |
| XP_021981395.1 | XP_022037775.1 | 1.254  | 1.3795 | 0.90903 |
| XP_021999258.1 | XP_022035551.1 | 1.3125 | 1.4435 | 0.90925 |
| XP_022001254.1 | XP_022004979.1 | 1.4044 | 1.5445 | 0.90929 |
| XP_021993220.1 | XP_022022487.2 | 1.3982 | 1.537  | 0.90969 |
| XP_021989737.1 | XP_022009213.1 | 0.7382 | 0.8114 | 0.90979 |
| XP_021987457.1 | XP_021993551.1 | 1.5189 | 1.6694 | 0.90985 |
| XP_021981395.1 | XP_022035551.1 | 1.1045 | 1.2137 | 0.91003 |
| XP_021981395.1 | XP_022001254.1 | 1.371  | 1.5065 | 0.91006 |
| XP_022002420.1 | XP_022022487.2 | 0.9966 | 1.0944 | 0.91064 |
| XP_021981388.1 | XP_021988953.1 | 1.1492 | 1.2595 | 0.91243 |

|                               |        |        |         |
|-------------------------------|--------|--------|---------|
| XP_022001254.1 XP_035842399.1 | 1.746  | 1.9131 | 0.91265 |
| XP_021984766.1 XP_022002419.1 | 1.157  | 1.2676 | 0.91275 |
| XP_022010919.1 XP_022029740.1 | 1.1999 | 1.3133 | 0.91365 |
| XP_021973316.1 XP_022037775.1 | 1.4402 | 1.5763 | 0.91366 |
| XP_022004980.1 XP_022010295.2 | 1.1836 | 1.2954 | 0.91369 |
| XP_022010296.1 XP_022021912.1 | 1.1509 | 1.2592 | 0.91399 |
| XP_021978842.1 XP_021993221.1 | 1.3576 | 1.485  | 0.91421 |
| XP_022010291.1 XP_022010296.1 | 0.6922 | 0.7571 | 0.91428 |
| XP_022000196.1 XP_022013239.1 | 1.6744 | 1.831  | 0.91447 |
| XP_021993221.1 XP_021993222.1 | 1.2453 | 1.361  | 0.91499 |
| XP_021993551.1 XP_022002419.1 | 1.1255 | 1.2297 | 0.91526 |
| XP_021988229.1 XP_021993283.1 | 1.7292 | 1.8891 | 0.91536 |
| XP_022000196.1 XP_022010291.1 | 1.2685 | 1.3857 | 0.91542 |
| XP_022000224.2 XP_022035384.1 | 1.3492 | 1.4732 | 0.91583 |
| XP_021988229.1 XP_022021913.1 | 1.2707 | 1.3871 | 0.91608 |
| XP_021988229.1 XP_022021914.1 | 1.2707 | 1.3871 | 0.91608 |
| XP_021993551.1 XP_022002418.1 | 1.1439 | 1.2486 | 0.91615 |
| XP_021989735.1 XP_022039074.2 | 1.2188 | 1.3298 | 0.91653 |
| XP_021972810.1 XP_022010616.1 | 1.0062 | 1.0977 | 0.91664 |
| XP_021981395.1 XP_021989736.1 | 0.4667 | 0.5087 | 0.91744 |
| XP_022005608.1 XP_022026963.1 | 1.2352 | 1.3462 | 0.91755 |
| XP_021987458.1 XP_021999258.1 | 1.5795 | 1.7208 | 0.91789 |
| XP_021993283.1 XP_022013558.1 | 1.3936 | 1.5178 | 0.91817 |
| XP_021993222.1 XP_022008276.2 | 1.4147 | 1.5402 | 0.91852 |
| XP_021984981.2 XP_035838717.1 | 0.9001 | 0.9798 | 0.91866 |
| XP_021973855.1 XP_021989734.1 | 1.9464 | 2.1181 | 0.91894 |
| XP_021988953.1 XP_022009213.1 | 1.1583 | 1.2602 | 0.91914 |
| XP_021969020.1 XP_022021911.1 | 1.3718 | 1.4917 | 0.91962 |
| XP_021969020.1 XP_022021913.1 | 1.3718 | 1.4917 | 0.91962 |
| XP_021969020.1 XP_022021914.1 | 1.3718 | 1.4917 | 0.91962 |
| XP_022026963.1 XP_035842399.1 | 1.3976 | 1.5197 | 0.91966 |
| XP_021989735.1 XP_022008276.2 | 1.4247 | 1.549  | 0.91975 |
| XP_021989736.1 XP_022035384.1 | 1.2276 | 1.3345 | 0.9199  |
| XP_021973316.1 XP_021999258.1 | 1.4539 | 1.5805 | 0.9199  |
| XP_021973011.1 XP_022021911.1 | 1.3515 | 1.469  | 0.92001 |
| XP_021973011.1 XP_022021913.1 | 1.3515 | 1.469  | 0.92001 |
| XP_021973011.1 XP_022021914.1 | 1.3515 | 1.469  | 0.92001 |
| XP_022010292.1 XP_022013239.1 | 0.9961 | 1.0826 | 0.9201  |
| XP_021995117.1 XP_021999258.1 | 1.3353 | 1.4501 | 0.92083 |
| XP_021993222.1 XP_022034230.1 | 1.6418 | 1.7827 | 0.92096 |
| XP_022002416.1 XP_022013239.1 | 0.9554 | 1.0373 | 0.92105 |
| XP_021992525.1 XP_021995116.1 | 1.3705 | 1.4862 | 0.92215 |
| XP_021992525.1 XP_022008276.2 | 1.1768 | 1.2761 | 0.92218 |
| XP_022010292.1 XP_022021912.1 | 1.3053 | 1.4153 | 0.92228 |
| XP_022010294.1 XP_022013182.1 | 1.3296 | 1.4414 | 0.92244 |
| XP_021987457.1 XP_022037775.1 | 1.5955 | 1.7296 | 0.92247 |
| XP_021984766.1 XP_022029739.1 | 1.2313 | 1.3346 | 0.9226  |
| XP_022035384.1 XP_022039074.2 | 1.4585 | 1.5806 | 0.92275 |
| XP_021981395.1 XP_021993551.1 | 1.448  | 1.5692 | 0.92276 |
| XP_022010291.1 XP_035833070.1 | 1.3258 | 1.4362 | 0.92313 |
| XP_021993221.1 XP_021993620.1 | 0.8317 | 0.9008 | 0.92329 |
| XP_021993551.1 XP_022013183.1 | 1.6186 | 1.7524 | 0.92365 |
| XP_021978807.1 XP_021984766.1 | 1.1876 | 1.2857 | 0.9237  |
| XP_021972810.1 XP_022039085.1 | 0.678  | 0.7337 | 0.92408 |
| XP_022005608.1 XP_022035551.1 | 1.2519 | 1.3547 | 0.92412 |
| XP_022005608.1 XP_022035552.1 | 1.2519 | 1.3547 | 0.92412 |
| XP_021992525.1 XP_022021913.1 | 1.4253 | 1.5423 | 0.92414 |
| XP_021993283.1 XP_021993551.1 | 1.451  | 1.5701 | 0.92414 |
| XP_021978842.1 XP_021985239.1 | 1.2942 | 1.4001 | 0.92436 |
| XP_021989733.1 XP_022029740.1 | 1.1731 | 1.269  | 0.92443 |
| XP_022005608.1 XP_022010295.2 | 1.2563 | 1.3587 | 0.92463 |
| XP_021995116.1 XP_022009213.1 | 1.6034 | 1.7337 | 0.92484 |
| XP_021993551.1 XP_022002417.1 | 1.161  | 1.2551 | 0.92503 |
| XP_022006668.1 XP_022006927.1 | 1.1723 | 1.2671 | 0.92518 |
| XP_021987457.1 XP_022010292.1 | 1.2238 | 1.3214 | 0.92614 |
| XP_021973011.1 XP_021993052.1 | 1.0918 | 1.1785 | 0.92643 |
| XP_022005608.1 XP_022029622.1 | 1.1068 | 1.1944 | 0.92666 |
| XP_021981388.1 XP_021993283.1 | 1.449  | 1.5633 | 0.92689 |
| XP_021976022.1 XP_022033162.1 | 1.2252 | 1.3216 | 0.92706 |
| XP_021981388.1 XP_022039074.2 | 1.3003 | 1.4026 | 0.92706 |
| XP_022000224.2 XP_022029740.1 | 0.9213 | 0.9937 | 0.92714 |
| XP_022002416.1 XP_022029738.1 | 0.5134 | 0.5537 | 0.92722 |
| XP_022002417.1 XP_022029738.1 | 0.5134 | 0.5537 | 0.92722 |
| XP_022013183.1 XP_035842399.1 | 1.6207 | 1.7478 | 0.92728 |
| XP_021973316.1 XP_022004455.1 | 1.1694 | 1.2611 | 0.92729 |
| XP_021984981.2 XP_022004979.1 | 1.1704 | 1.2618 | 0.92756 |
| XP_021984766.1 XP_022033162.1 | 1.2484 | 1.3458 | 0.92763 |
| XP_021993052.1 XP_022006926.1 | 1.0209 | 1.1002 | 0.92792 |
| XP_021976022.1 XP_022010291.1 | 1.2042 | 1.2974 | 0.92816 |
| XP_022013182.1 XP_022013239.1 | 1.5234 | 1.6404 | 0.92868 |
| XP_021993622.1 XP_022008276.2 | 1.6908 | 1.8201 | 0.92896 |
| XP_022010919.1 XP_022013239.1 | 1.4223 | 1.5307 | 0.92918 |
| XP_022029739.1 XP_022029740.1 | 0.4706 | 0.5064 | 0.9293  |
| XP_021993621.2 XP_022029622.1 | 1.473  | 1.5847 | 0.92951 |
| XP_021973854.1 XP_022002415.1 | 1.1899 | 1.2798 | 0.92975 |
| XP_021993220.1 XP_035833070.1 | 1.4087 | 1.5148 | 0.92996 |
| XP_035833070.1 XP_035835830.1 | 1.1146 | 1.1983 | 0.93015 |
| XP_022010616.1 XP_022035551.1 | 1.1629 | 1.2499 | 0.93039 |

|                |                |        |        |         |
|----------------|----------------|--------|--------|---------|
| XP_022010616.1 | XP_022035552.1 | 1.1629 | 1.2499 | 0.93039 |
| XP_021999258.1 | XP_035838717.1 | 1.2861 | 1.3816 | 0.93088 |
| XP_021989735.1 | XP_022006327.1 | 1.3465 | 1.4462 | 0.93106 |
| XP_021984766.1 | XP_022021912.1 | 1.478  | 1.5873 | 0.93114 |
| XP_021981407.1 | XP_035838717.1 | 0.6808 | 0.7306 | 0.93184 |
| XP_022006668.1 | XP_022034230.1 | 1.5792 | 1.6935 | 0.93251 |
| XP_021993222.1 | XP_035838717.1 | 1.644  | 1.7629 | 0.93255 |
| XP_022006668.1 | XP_022014870.1 | 1.307  | 1.4015 | 0.93257 |
| XP_021999258.1 | XP_022029622.1 | 1.3022 | 1.396  | 0.93281 |
| XP_021978807.1 | XP_021978842.1 | 1.1702 | 1.2539 | 0.93325 |
| XP_022005608.1 | XP_035835830.1 | 1.2058 | 1.2919 | 0.93335 |
| XP_021973316.1 | XP_022033162.1 | 1.3938 | 1.4932 | 0.93343 |
| XP_021999258.1 | XP_022022835.1 | 1.027  | 1.0992 | 0.93432 |
| XP_021968895.1 | XP_022026963.1 | 1.1675 | 1.2491 | 0.93467 |
| XP_022010101.1 | XP_022021913.1 | 1.4335 | 1.5336 | 0.93473 |
| XP_022010101.1 | XP_022021914.1 | 1.4335 | 1.5336 | 0.93473 |
| XP_021978807.1 | XP_022021912.1 | 1.3049 | 1.3959 | 0.93481 |
| XP_021976022.1 | XP_022001254.1 | 1.4225 | 1.5213 | 0.93506 |
| XP_021993551.1 | XP_021993620.1 | 1.4815 | 1.5841 | 0.93523 |
| XP_021999258.1 | XP_022010101.1 | 1.4019 | 1.4989 | 0.93529 |
| XP_021993221.1 | XP_022014870.1 | 1.8252 | 1.9514 | 0.93533 |
| XP_021993221.1 | XP_022029738.1 | 1.2814 | 1.3695 | 0.93567 |
| XP_021993052.1 | XP_021993283.1 | 1.4891 | 1.5914 | 0.93572 |
| XP_021993622.1 | XP_022000224.2 | 1.5508 | 1.657  | 0.93591 |
| XP_021993622.1 | XP_022013560.1 | 1.5044 | 1.6053 | 0.93715 |
| XP_022002415.1 | XP_035842399.1 | 1.1134 | 1.1878 | 0.93736 |
| XP_021993551.1 | XP_035835830.1 | 1.2321 | 1.3141 | 0.9376  |
| XP_021993551.1 | XP_022010291.1 | 1.4074 | 1.5008 | 0.93777 |
| XP_021976022.1 | XP_022035552.1 | 1.482  | 1.579  | 0.93857 |
| XP_021973316.1 | XP_022035384.1 | 1.2482 | 1.3298 | 0.93864 |
| XP_021973855.1 | XP_022010292.1 | 1.4436 | 1.5378 | 0.93874 |
| XP_022006927.1 | XP_022013239.1 | 1.2987 | 1.3826 | 0.93932 |
| XP_021989733.1 | XP_021989735.1 | 0.1851 | 0.197  | 0.93959 |
| XP_021978807.1 | XP_022006668.1 | 1.1895 | 1.2656 | 0.93987 |
| XP_021981395.1 | XP_021989737.1 | 0.5094 | 0.5419 | 0.94003 |
| XP_021999258.1 | XP_022018622.1 | 1.463  | 1.556  | 0.94023 |
| XP_021978842.1 | XP_035835830.1 | 1.2375 | 1.3159 | 0.94042 |
| XP_021993052.1 | XP_021993222.1 | 1.3593 | 1.445  | 0.94069 |
| XP_021972810.1 | XP_022002416.1 | 0.6767 | 0.7193 | 0.94078 |
| XP_021993283.1 | XP_022010292.1 | 1.4024 | 1.4905 | 0.94089 |
| XP_021999258.1 | XP_022010919.1 | 1.5628 | 1.6602 | 0.94133 |
| XP_022010101.1 | XP_022021911.1 | 1.4128 | 1.5007 | 0.94143 |
| XP_021988229.1 | XP_035842399.1 | 1.5621 | 1.6585 | 0.94188 |
| XP_021978807.1 | XP_022002418.1 | 1.0134 | 1.0751 | 0.94261 |
| XP_021973316.1 | XP_021993551.1 | 1.7152 | 1.8193 | 0.94278 |
| XP_021981626.1 | XP_022006668.1 | 1.4279 | 1.5142 | 0.94301 |
| XP_022013183.1 | XP_022035551.1 | 1.0455 | 1.1086 | 0.94308 |
| XP_021993221.1 | XP_022035384.1 | 1.9987 | 2.1192 | 0.94314 |
| XP_022013239.1 | XP_022022487.2 | 1.498  | 1.5878 | 0.94344 |
| XP_021981407.1 | XP_022022487.2 | 1.288  | 1.3652 | 0.94345 |
| XP_021989735.1 | XP_021989737.1 | 0.3121 | 0.3308 | 0.94347 |
| XP_021993622.1 | XP_022010291.1 | 1.3214 | 1.4002 | 0.94372 |
| XP_021978807.1 | XP_022002415.1 | 0.9876 | 1.0462 | 0.94399 |
| XP_021984981.2 | XP_021989737.1 | 0.764  | 0.8093 | 0.94403 |
| XP_022004980.1 | XP_022035384.1 | 1.6495 | 1.7473 | 0.94403 |
| XP_022004980.1 | XP_022010292.1 | 1.1151 | 1.1805 | 0.9446  |
| XP_021989736.1 | XP_021993220.1 | 1.5997 | 1.6933 | 0.94472 |
| XP_021969020.1 | XP_021973855.1 | 1.9711 | 2.0855 | 0.94515 |
| XP_022022835.1 | XP_022035384.1 | 1.3419 | 1.4197 | 0.9452  |
| XP_022006926.1 | XP_022022487.2 | 1.1855 | 1.2542 | 0.94522 |
| XP_021972810.1 | XP_035835830.1 | 0.1838 | 0.1944 | 0.94547 |
| XP_022002418.1 | XP_022010616.1 | 0.9075 | 0.9595 | 0.94581 |
| XP_021999258.1 | XP_022004455.1 | 1.197  | 1.2655 | 0.94587 |
| XP_021973855.1 | XP_022006927.1 | 1.295  | 1.369  | 0.94595 |
| XP_021981626.1 | XP_021984981.2 | 1.2929 | 1.3665 | 0.94614 |
| XP_021978842.1 | XP_022022487.2 | 1.1374 | 1.2019 | 0.94633 |
| XP_021978842.1 | XP_022029740.1 | 1.347  | 1.4232 | 0.94646 |
| XP_021969020.1 | XP_022039085.1 | 1.6275 | 1.7192 | 0.94666 |
| XP_021976022.1 | XP_022029739.1 | 1.2978 | 1.3709 | 0.94668 |
| XP_021989736.1 | XP_022001254.1 | 1.2272 | 1.2953 | 0.94743 |
| XP_021988953.1 | XP_022013182.1 | 1.251  | 1.3203 | 0.94751 |
| XP_022005608.1 | XP_022006927.1 | 1.2403 | 1.3089 | 0.94759 |
| XP_021981388.1 | XP_022001254.1 | 1.1995 | 1.2653 | 0.948   |
| XP_021987457.1 | XP_022018622.1 | 1.3909 | 1.467  | 0.94813 |
| XP_022004979.1 | XP_022026963.1 | 1.2151 | 1.2812 | 0.94841 |
| XP_022014870.1 | XP_035838717.1 | 0.9735 | 1.0264 | 0.94846 |
| XP_021987457.1 | XP_021993621.2 | 1.1058 | 1.1658 | 0.94853 |
| XP_021987458.1 | XP_021993621.2 | 1.1058 | 1.1658 | 0.94853 |
| XP_021995116.1 | XP_022039085.1 | 1.671  | 1.7609 | 0.94895 |
| XP_022005608.1 | XP_022008276.2 | 1.4958 | 1.5756 | 0.94935 |
| XP_021969020.1 | XP_022022487.2 | 1.5561 | 1.6383 | 0.94983 |
| XP_022009213.1 | XP_022039074.2 | 1.2269 | 1.2914 | 0.95005 |
| XP_022013182.1 | XP_022035551.1 | 1.0128 | 1.0657 | 0.95036 |
| XP_021973011.1 | XP_022021912.1 | 1.2683 | 1.3345 | 0.95039 |
| XP_021992525.1 | XP_022021912.1 | 1.4048 | 1.4779 | 0.95054 |
| XP_022010919.1 | XP_022021911.1 | 1.4325 | 1.5061 | 0.95113 |
| XP_022010295.2 | XP_022021913.1 | 1.2026 | 1.2642 | 0.95127 |
| XP_022010295.2 | XP_022021914.1 | 1.2026 | 1.2642 | 0.95127 |

|                               |        |        |         |
|-------------------------------|--------|--------|---------|
| XP_021995116.1 XP_022021913.1 | 1.6493 | 1.7337 | 0.95132 |
| XP_021995116.1 XP_022021914.1 | 1.6493 | 1.7337 | 0.95132 |
| XP_021993221.1 XP_035835830.1 | 1.3264 | 1.3939 | 0.95157 |
| XP_021993622.1 XP_022010919.1 | 1.8444 | 1.9379 | 0.95175 |
| XP_021978842.1 XP_022010919.1 | 1.3422 | 1.4102 | 0.95178 |
| XP_021988229.1 XP_022010294.1 | 0.9562 | 1.0044 | 0.95201 |
| XP_021981407.1 XP_021989737.1 | 0.4268 | 0.4483 | 0.95204 |
| XP_021988953.1 XP_022035551.1 | 1.1532 | 1.2111 | 0.95219 |
| XP_021988953.1 XP_022035552.1 | 1.1532 | 1.2111 | 0.95219 |
| XP_021984981.2 XP_022008276.2 | 1.2968 | 1.3617 | 0.95234 |
| XP_022002421.1 XP_022010616.1 | 0.8918 | 0.9362 | 0.95257 |
| XP_021989736.1 XP_022029622.1 | 1.1845 | 1.2429 | 0.95301 |
| XP_021995116.1 XP_022006327.1 | 1.4643 | 1.5352 | 0.95382 |
| XP_021972810.1 XP_022026964.1 | 1.212  | 1.2704 | 0.95403 |
| XP_022013183.1 XP_022021911.1 | 1.4233 | 1.4918 | 0.95408 |
| XP_021987458.1 XP_021993551.1 | 1.5815 | 1.6564 | 0.95478 |
| XP_022006927.1 XP_022029622.1 | 1.3374 | 1.4005 | 0.95494 |
| XP_021973316.1 XP_022006668.1 | 1.5865 | 1.6613 | 0.95498 |
| XP_021984766.1 XP_022037775.1 | 1.3595 | 1.4228 | 0.95551 |
| XP_021988953.1 XP_022013183.1 | 1.3012 | 1.3613 | 0.95585 |
| XP_022013182.1 XP_022021912.1 | 1.3803 | 1.4435 | 0.95622 |
| XP_021999258.1 XP_022029740.1 | 1.0326 | 1.0788 | 0.95717 |
| XP_022005608.1 XP_022014870.1 | 1.4023 | 1.4638 | 0.95799 |
| XP_021993222.1 XP_022021913.1 | 1.6652 | 1.7378 | 0.95822 |
| XP_022010919.1 XP_022039085.1 | 1.194  | 1.2451 | 0.95896 |
| XP_022029739.1 XP_035842399.1 | 1.317  | 1.3725 | 0.95956 |
| XP_022010291.1 XP_035842399.1 | 1.3565 | 1.4125 | 0.96035 |
| XP_021973855.1 XP_022013182.1 | 1.7199 | 1.7904 | 0.96062 |
| XP_021993052.1 XP_022037775.1 | 1.2377 | 1.2871 | 0.96162 |
| XP_022001254.1 XP_022014870.1 | 1.2284 | 1.2769 | 0.96202 |
| XP_021989733.1 XP_021999258.1 | 1.3005 | 1.3518 | 0.96205 |
| XP_021987458.1 XP_022018622.1 | 1.4125 | 1.468  | 0.96219 |
| XP_022021913.1 XP_022039074.2 | 1.415  | 1.4703 | 0.96239 |
| XP_022021914.1 XP_022039074.2 | 1.415  | 1.4703 | 0.96239 |
| XP_021989735.1 XP_021992525.1 | 1.0131 | 1.0516 | 0.96339 |
| XP_022000224.2 XP_022010101.1 | 1.3502 | 1.4013 | 0.96353 |
| XP_021984981.2 XP_022029622.1 | 1.3404 | 1.3909 | 0.96369 |
| XP_021993221.1 XP_022037775.1 | 1.5494 | 1.6075 | 0.96386 |
| XP_021981407.1 XP_022009213.1 | 0.6838 | 0.7094 | 0.96391 |
| XP_022004980.1 XP_022039085.1 | 1.356  | 1.4065 | 0.9641  |
| XP_021973316.1 XP_022006327.1 | 1.5948 | 1.6537 | 0.96438 |
| XP_021984766.1 XP_022010101.1 | 1.2961 | 1.3438 | 0.9645  |
| XP_021989737.1 XP_022029622.1 | 1.1382 | 1.179  | 0.96539 |
| XP_021989734.1 XP_022001254.1 | 1.1874 | 1.2299 | 0.96544 |
| XP_021986500.1 XP_022029740.1 | 0.9792 | 1.0142 | 0.96549 |
| XP_021989733.1 XP_022006927.1 | 1.288  | 1.334  | 0.96552 |
| XP_021976022.1 XP_022018622.1 | 1.3373 | 1.385  | 0.96556 |
| XP_021973854.1 XP_022022835.1 | 1.4845 | 1.5373 | 0.96565 |
| XP_021989734.1 XP_022029622.1 | 1.1759 | 1.2176 | 0.96575 |
| XP_021989737.1 XP_021999258.1 | 1.2825 | 1.3278 | 0.96588 |
| XP_021981388.1 XP_022006927.1 | 1.3649 | 1.4131 | 0.96589 |
| XP_022021911.1 XP_022039074.2 | 1.3992 | 1.4477 | 0.9665  |
| XP_022010295.2 XP_022021912.1 | 1.1317 | 1.1706 | 0.96677 |
| XP_022010616.1 XP_035835830.1 | 1.1243 | 1.1629 | 0.96681 |
| XP_021969020.1 XP_021993220.1 | 1.6991 | 1.7572 | 0.96694 |
| XP_022013183.1 XP_022021913.1 | 1.4501 | 1.4995 | 0.96706 |
| XP_021968895.1 XP_021985239.1 | 0.851  | 0.8792 | 0.96793 |
| XP_021995116.1 XP_022013182.1 | 1.3977 | 1.444  | 0.96794 |
| XP_021993221.1 XP_021995116.1 | 1.2589 | 1.3005 | 0.96801 |
| XP_021989736.1 XP_022006927.1 | 1.1827 | 1.2217 | 0.96808 |
| XP_021995117.1 XP_022039074.2 | 1.1175 | 1.1531 | 0.96913 |
| XP_021972810.1 XP_021976022.1 | 1.5257 | 1.5724 | 0.9703  |
| XP_021973316.1 XP_022029738.1 | 1.2457 | 1.2838 | 0.97032 |
| XP_021976022.1 XP_022035551.1 | 1.4941 | 1.5397 | 0.97038 |
| XP_021993551.1 XP_022033162.1 | 1.7862 | 1.8407 | 0.97039 |
| XP_021973854.1 XP_021981395.1 | 1.6851 | 1.7364 | 0.97046 |
| XP_021984981.2 XP_021989735.1 | 0.8316 | 0.8568 | 0.97059 |
| XP_021976022.1 XP_021978807.1 | 1.4144 | 1.4568 | 0.9709  |
| XP_021981388.1 XP_021993551.1 | 1.3849 | 1.4254 | 0.97159 |
| XP_021995116.1 XP_022005608.1 | 1.3657 | 1.4056 | 0.97161 |
| XP_022022835.1 XP_022029738.1 | 1.1452 | 1.1775 | 0.97257 |
| XP_021978842.1 XP_022002417.1 | 1.1427 | 1.1748 | 0.97268 |
| XP_022006926.1 XP_022013182.1 | 1.5694 | 1.6134 | 0.97273 |
| XP_021989733.1 XP_022009213.1 | 0.7844 | 0.8063 | 0.97284 |
| XP_022013183.1 XP_035838717.1 | 1.098  | 1.1281 | 0.97332 |
| XP_022006668.1 XP_022039074.2 | 1.2285 | 1.2618 | 0.97361 |
| XP_021973316.1 XP_022013560.1 | 1.2489 | 1.2827 | 0.97365 |
| XP_021989737.1 XP_022010291.1 | 1.1151 | 1.1451 | 0.9738  |
| XP_021978842.1 XP_021999258.1 | 1.1956 | 1.2273 | 0.97417 |
| XP_021981395.1 XP_021993283.1 | 1.4911 | 1.5302 | 0.97445 |
| XP_021984766.1 XP_021993283.1 | 1.9832 | 2.0343 | 0.97488 |
| XP_021989733.1 XP_035838717.1 | 0.7813 | 0.801  | 0.97541 |
| XP_021978842.1 XP_022006327.1 | 1.4832 | 1.5203 | 0.9756  |
| XP_021981407.1 XP_022001254.1 | 1.4019 | 1.4369 | 0.97564 |
| XP_022004980.1 XP_022006668.1 | 2.0421 | 2.0921 | 0.9761  |
| XP_022035551.1 XP_035838717.1 | 1.1802 | 1.2085 | 0.97658 |
| XP_021993551.1 XP_022014870.1 | 1.4187 | 1.452  | 0.97707 |
| XP_021995116.1 XP_022021911.1 | 1.6017 | 1.6382 | 0.97772 |

|                |                |        |        |         |
|----------------|----------------|--------|--------|---------|
| XP_021993551.1 | XP_022002416.1 | 1.1653 | 1.1914 | 0.97809 |
| XP_021993620.1 | XP_022026963.1 | 1.287  | 1.3154 | 0.97841 |
| XP_021969020.1 | XP_022006926.1 | 1.5739 | 1.6084 | 0.97855 |
| XP_022004455.1 | XP_022029740.1 | 0.4072 | 0.4161 | 0.97861 |
| XP_021973855.1 | XP_021999258.1 | 1.6403 | 1.6745 | 0.97958 |
| XP_021978842.1 | XP_022029622.1 | 1.5275 | 1.5567 | 0.98124 |
| XP_022002421.1 | XP_035842399.1 | 1.2961 | 1.3208 | 0.9813  |
| XP_022035552.1 | XP_035838717.1 | 1.1775 | 1.1997 | 0.9815  |
| XP_021993283.1 | XP_022022487.2 | 1.6109 | 1.6408 | 0.98178 |
| XP_022008275.1 | XP_022009213.1 | 1.1765 | 1.1982 | 0.98189 |
| XP_022013239.1 | XP_022035552.1 | 1.6864 | 1.7175 | 0.98189 |
| XP_022004455.1 | XP_022013560.1 | 0.6204 | 0.6315 | 0.98242 |
| XP_021969020.1 | XP_022018622.1 | 1.2905 | 1.3133 | 0.98264 |
| XP_022013183.1 | XP_022035552.1 | 1.0509 | 1.069  | 0.98307 |
| XP_021988953.1 | XP_022010919.1 | 1.5281 | 1.5544 | 0.98308 |
| XP_021989735.1 | XP_021999258.1 | 1.3601 | 1.3832 | 0.9833  |
| XP_021993222.1 | XP_022022487.2 | 1.6912 | 1.7192 | 0.98371 |
| XP_021978842.1 | XP_022009213.1 | 1.2142 | 1.2339 | 0.98403 |
| XP_021986500.1 | XP_022001254.1 | 0.9612 | 0.9767 | 0.98413 |
| XP_022006327.1 | XP_022039074.2 | 1.3894 | 1.4118 | 0.98413 |
| XP_021988953.1 | XP_022008276.2 | 1.5726 | 1.5978 | 0.98423 |
| XP_021993283.1 | XP_022029739.1 | 1.5922 | 1.6174 | 0.98442 |
| XP_021989737.1 | XP_022022487.2 | 1.2913 | 1.3113 | 0.98475 |
| XP_022008276.2 | XP_022037775.1 | 1.3827 | 1.4039 | 0.9849  |
| XP_021995116.1 | XP_022035551.1 | 1.8344 | 1.8625 | 0.98491 |
| XP_021995116.1 | XP_022035552.1 | 1.8344 | 1.8625 | 0.98491 |
| XP_022013239.1 | XP_022035551.1 | 1.672  | 1.6971 | 0.98521 |
| XP_022013183.1 | XP_022021914.1 | 1.4641 | 1.4848 | 0.98606 |
| XP_021989733.1 | XP_022029622.1 | 1.1678 | 1.1841 | 0.98623 |
| XP_022010919.1 | XP_022021913.1 | 1.465  | 1.4854 | 0.98627 |
| XP_022010919.1 | XP_022021914.1 | 1.465  | 1.4854 | 0.98627 |
| XP_022006926.1 | XP_022021912.1 | 1.8365 | 1.8592 | 0.98779 |
| XP_021993283.1 | XP_022010291.1 | 1.3974 | 1.4141 | 0.98819 |
| XP_021988953.1 | XP_021993220.1 | 1.7184 | 1.7384 | 0.9885  |
| XP_022013560.1 | XP_035833070.1 | 1.4479 | 1.4639 | 0.98907 |
| XP_021973316.1 | XP_021984766.1 | 1.26   | 1.2732 | 0.98963 |
| XP_021985239.1 | XP_022029740.1 | 0.9293 | 0.9388 | 0.98988 |
| XP_022013182.1 | XP_022035552.1 | 1.0176 | 1.0274 | 0.99046 |
| XP_021993622.1 | XP_022004455.1 | 1.1552 | 1.1663 | 0.99048 |
| XP_021993551.1 | XP_022013182.1 | 1.6443 | 1.6599 | 0.9906  |
| XP_022006327.1 | XP_022021912.1 | 1.4741 | 1.4866 | 0.99159 |
| XP_021984981.2 | XP_022009213.1 | 0.9425 | 0.9502 | 0.9919  |
| XP_021995116.1 | XP_022039074.2 | 1.5668 | 1.5796 | 0.9919  |
| XP_021978807.1 | XP_021993283.1 | 1.4796 | 1.4894 | 0.99342 |
| XP_022006668.1 | XP_022013183.1 | 1.3684 | 1.3774 | 0.99347 |
| XP_021978842.1 | XP_022010101.1 | 1.312  | 1.3202 | 0.99379 |
| XP_021992525.1 | XP_021993622.1 | 1.63   | 1.6397 | 0.99408 |
| XP_021984766.1 | XP_022015084.1 | 1.1763 | 1.1832 | 0.99417 |
| XP_021989735.1 | XP_022035384.1 | 1.1952 | 1.2015 | 0.99476 |
| XP_022013558.1 | XP_022021911.1 | 1.2032 | 1.2093 | 0.99496 |
| XP_022013558.1 | XP_022021913.1 | 1.2032 | 1.2093 | 0.99496 |
| XP_022013558.1 | XP_022021914.1 | 1.2032 | 1.2093 | 0.99496 |
| XP_022000196.1 | XP_035842399.1 | 1.5138 | 1.5212 | 0.99514 |
| XP_021993221.1 | XP_022021911.1 | 1.4896 | 1.4964 | 0.99546 |
| XP_021973855.1 | XP_022000196.1 | 2.0477 | 2.0558 | 0.99606 |
| XP_022004980.1 | XP_022013239.1 | 1.431  | 1.4365 | 0.99617 |
| XP_021989733.1 | XP_021989737.1 | 0.2948 | 0.2959 | 0.99628 |
| XP_022000196.1 | XP_022035551.1 | 1.6466 | 1.6527 | 0.99631 |
| XP_021981407.1 | XP_021989735.1 | 0.428  | 0.4295 | 0.99651 |
| XP_021981388.1 | XP_022022487.2 | 1.2824 | 1.2863 | 0.99697 |
| XP_022022487.2 | XP_022026964.1 | 1.3514 | 1.3548 | 0.99749 |
| XP_022002421.1 | XP_022013239.1 | 1.1075 | 1.1102 | 0.99757 |
| XP_022000196.1 | XP_022035384.1 | 1.2728 | 1.2748 | 0.99843 |
| XP_021993622.1 | XP_022029622.1 | 1.4305 | 1.4318 | 0.99909 |
| XP_022006927.1 | XP_022035551.1 | 1.2471 | 1.2481 | 0.9992  |
| XP_021981395.1 | XP_021989733.1 | 0.4446 | 0.4449 | 0.99933 |
| XP_022013183.1 | XP_022035384.1 | 1.3641 | 1.3646 | 0.99963 |
| XP_021988953.1 | XP_021993221.1 | 1.6479 | 1.6479 | 1       |
| XP_022013182.1 | XP_035842399.1 | 1.6479 | 1.6479 | 1       |
| XP_022021911.1 | XP_022037775.1 | 1.199  | 1.1987 | 1.00025 |
| XP_022021913.1 | XP_022037775.1 | 1.199  | 1.1987 | 1.00025 |
| XP_022021914.1 | XP_022037775.1 | 1.199  | 1.1987 | 1.00025 |
| XP_021989735.1 | XP_021993220.1 | 1.6785 | 1.6764 | 1.00125 |
| XP_021993222.1 | XP_021993621.2 | 0.8437 | 0.8426 | 1.00131 |
| XP_022001254.1 | XP_022029622.1 | 1.3334 | 1.3316 | 1.00135 |
| XP_022021912.1 | XP_022039074.2 | 1.3132 | 1.3113 | 1.00145 |
| XP_021973854.1 | XP_021981407.1 | 1.5418 | 1.5391 | 1.00175 |
| XP_021988229.1 | XP_021993551.1 | 1.482  | 1.4792 | 1.00189 |
| XP_021993222.1 | XP_022000224.2 | 1.5487 | 1.5449 | 1.00246 |
| XP_021988229.1 | XP_022022835.1 | 1.1716 | 1.1686 | 1.00257 |
| XP_021981626.1 | XP_022015084.1 | 1.5836 | 1.5793 | 1.00272 |
| XP_022035384.1 | XP_022039085.1 | 1.7807 | 1.7758 | 1.00276 |
| XP_021973855.1 | XP_022018622.1 | 1.7437 | 1.7384 | 1.00305 |
| XP_021989734.1 | XP_021989735.1 | 0.1755 | 0.1749 | 1.00343 |
| XP_022013182.1 | XP_035838717.1 | 1.0888 | 1.085  | 1.0035  |
| XP_021993622.1 | XP_035842399.1 | 1.9566 | 1.9493 | 1.00374 |
| XP_022022487.2 | XP_022022835.1 | 1.4832 | 1.4773 | 1.00399 |
| XP_022021911.1 | XP_022035551.1 | 1.442  | 1.4362 | 1.00404 |

|                |                |        |        |         |
|----------------|----------------|--------|--------|---------|
| XP_022021913.1 | XP_022035551.1 | 1.442  | 1.4362 | 1.00404 |
| XP_022021914.1 | XP_022035551.1 | 1.442  | 1.4362 | 1.00404 |
| XP_022005608.1 | XP_022013182.1 | 1.145  | 1.1399 | 1.00447 |
| XP_022005608.1 | XP_022013183.1 | 1.145  | 1.1399 | 1.00447 |
| XP_021988229.1 | XP_022000224.2 | 1.101  | 1.0959 | 1.00465 |
| XP_022035384.1 | XP_022035551.1 | 1.469  | 1.4614 | 1.0052  |
| XP_021972810.1 | XP_022018622.1 | 1.2637 | 1.2569 | 1.00541 |
| XP_021987457.1 | XP_022013558.1 | 1.2992 | 1.2921 | 1.00549 |
| XP_022022835.1 | XP_035833070.1 | 1.7479 | 1.7378 | 1.00581 |
| XP_021973854.1 | XP_021989737.1 | 1.3169 | 1.3089 | 1.00611 |
| XP_021989734.1 | XP_021989737.1 | 0.2623 | 0.2607 | 1.00614 |
| XP_021993551.1 | XP_022002415.1 | 1.1738 | 1.1665 | 1.00626 |
| XP_021968895.1 | XP_021969020.1 | 1.5249 | 1.5152 | 1.0064  |
| XP_021978842.1 | XP_022013182.1 | 1.2949 | 1.2861 | 1.00684 |
| XP_021976022.1 | XP_021993052.1 | 1.4952 | 1.485  | 1.00687 |
| XP_021989736.1 | XP_022029740.1 | 1.1642 | 1.1557 | 1.00735 |
| XP_021993221.1 | XP_022021914.1 | 1.5109 | 1.4994 | 1.00767 |
| XP_021989734.1 | XP_021999258.1 | 1.3058 | 1.2957 | 1.0078  |
| XP_021981407.1 | XP_021993283.1 | 1.4021 | 1.3907 | 1.0082  |
| XP_021976022.1 | XP_021986500.1 | 1.2242 | 1.2142 | 1.00824 |
| XP_022002417.1 | XP_022002418.1 | 0.0483 | 0.0479 | 1.00835 |
| XP_022002415.1 | XP_022029738.1 | 0.5407 | 0.5362 | 1.00839 |
| XP_021993620.1 | XP_022006327.1 | 1.3398 | 1.3285 | 1.00851 |
| XP_021985239.1 | XP_022006668.1 | 1.1747 | 1.1646 | 1.00867 |
| XP_021989735.1 | XP_021993222.1 | 1.5465 | 1.5331 | 1.00874 |
| XP_022021911.1 | XP_022039085.1 | 1.4964 | 1.4833 | 1.00883 |
| XP_022000196.1 | XP_022037775.1 | 1.3089 | 1.2974 | 1.00886 |
| XP_021973855.1 | XP_022029738.1 | 1.4496 | 1.4367 | 1.00898 |
| XP_021973316.1 | XP_021985239.1 | 1.2016 | 1.1906 | 1.00924 |
| XP_021993283.1 | XP_022009213.1 | 1.5496 | 1.5348 | 1.00964 |
| XP_021993283.1 | XP_022013560.1 | 1.5983 | 1.5827 | 1.00986 |
| XP_021989735.1 | XP_022039085.1 | 1.2598 | 1.2475 | 1.00986 |
| XP_021993220.1 | XP_021993622.1 | 1.6651 | 1.6479 | 1.01044 |
| XP_021978842.1 | XP_022033162.1 | 1.2009 | 1.1881 | 1.01077 |
| XP_022000196.1 | XP_022035552.1 | 1.6335 | 1.6151 | 1.01139 |
| XP_022002415.1 | XP_022013239.1 | 0.9642 | 0.9531 | 1.01165 |
| XP_022010101.1 | XP_022010616.1 | 1.1809 | 1.1673 | 1.01165 |
| XP_021989734.1 | XP_021992525.1 | 0.9803 | 0.969  | 1.01166 |
| XP_021978842.1 | XP_022013183.1 | 1.2485 | 1.2341 | 1.01167 |
| XP_022010292.1 | XP_022010296.1 | 0.1592 | 0.1573 | 1.01208 |
| XP_022014870.1 | XP_022026964.1 | 1.2517 | 1.2366 | 1.01221 |
| XP_022006327.1 | XP_022010292.1 | 1.2567 | 1.2413 | 1.01241 |
| XP_021978842.1 | XP_021993283.1 | 1.5143 | 1.4957 | 1.01244 |
| XP_022021913.1 | XP_022039085.1 | 1.5006 | 1.4819 | 1.01262 |
| XP_022021914.1 | XP_022039085.1 | 1.5006 | 1.4819 | 1.01262 |
| XP_022014870.1 | XP_022026963.1 | 1.6235 | 1.6028 | 1.01291 |
| XP_022010295.2 | XP_022021911.1 | 1.1979 | 1.1824 | 1.01311 |
| XP_021993052.1 | XP_022013558.1 | 0.9164 | 0.9045 | 1.01316 |
| XP_021981407.1 | XP_021989733.1 | 0.3867 | 0.3816 | 1.01336 |
| XP_022035384.1 | XP_022035552.1 | 1.4576 | 1.4382 | 1.01349 |
| XP_021988953.1 | XP_022005608.1 | 1.2237 | 1.2071 | 1.01375 |
| XP_021973854.1 | XP_022021912.1 | 1.7145 | 1.69   | 1.0145  |
| XP_022010291.1 | XP_022035384.1 | 1.3515 | 1.3318 | 1.01479 |
| XP_021984766.1 | XP_021988953.1 | 1.1294 | 1.1126 | 1.0151  |
| XP_021993222.1 | XP_022006926.1 | 1.3768 | 1.3558 | 1.01549 |
| XP_021988953.1 | XP_022029738.1 | 1.1961 | 1.1778 | 1.01554 |
| XP_021981626.1 | XP_022026964.1 | 1.2235 | 1.2047 | 1.01561 |
| XP_021993221.1 | XP_022006927.1 | 1.415  | 1.3927 | 1.01601 |
| XP_021986500.1 | XP_021993622.1 | 1.7436 | 1.7161 | 1.01602 |
| XP_022021911.1 | XP_022022487.2 | 1.422  | 1.3995 | 1.01608 |
| XP_022021913.1 | XP_022022487.2 | 1.422  | 1.3995 | 1.01608 |
| XP_022021914.1 | XP_022022487.2 | 1.422  | 1.3995 | 1.01608 |
| XP_022006327.1 | XP_022006927.1 | 1.4645 | 1.4412 | 1.01617 |
| XP_021973855.1 | XP_022002421.1 | 1.5379 | 1.5125 | 1.01679 |
| XP_021973316.1 | XP_035833070.1 | 1.8368 | 1.8054 | 1.01739 |
| XP_021973855.1 | XP_022021912.1 | 1.6775 | 1.6479 | 1.01796 |
| XP_021985239.1 | XP_021993222.1 | 1.3573 | 1.3332 | 1.01808 |
| XP_022006926.1 | XP_022014870.1 | 1.4264 | 1.4008 | 1.01828 |
| XP_021972810.1 | XP_022010919.1 | 1.2968 | 1.2735 | 1.0183  |
| XP_022010295.2 | XP_022013183.1 | 1.4206 | 1.3947 | 1.01857 |
| XP_022006926.1 | XP_022037775.1 | 1.3119 | 1.2861 | 1.02006 |
| XP_021987457.1 | XP_022005608.1 | 1.1761 | 1.1528 | 1.02021 |
| XP_021993283.1 | XP_022013239.1 | 1.7031 | 1.6692 | 1.02031 |
| XP_021973316.1 | XP_022021913.1 | 1.4314 | 1.4028 | 1.02039 |
| XP_021981626.1 | XP_021993622.1 | 1.5039 | 1.4718 | 1.02181 |
| XP_021995117.1 | XP_022006668.1 | 1.2337 | 1.2071 | 1.02204 |
| XP_022014870.1 | XP_022039074.2 | 1.4123 | 1.3815 | 1.02229 |
| XP_022006927.1 | XP_022035552.1 | 1.236  | 1.2089 | 1.02242 |
| XP_021973854.1 | XP_021986500.1 | 1.4927 | 1.4594 | 1.02282 |
| XP_021993220.1 | XP_022026963.1 | 1.304  | 1.2745 | 1.02315 |
| XP_021993551.1 | XP_022013558.1 | 1.3262 | 1.295  | 1.02409 |
| XP_021988229.1 | XP_021995117.1 | 1.0655 | 1.0403 | 1.02422 |
| XP_022021911.1 | XP_022035552.1 | 1.4335 | 1.399  | 1.02466 |
| XP_022021913.1 | XP_022035552.1 | 1.4335 | 1.399  | 1.02466 |
| XP_022021914.1 | XP_022035552.1 | 1.4335 | 1.399  | 1.02466 |
| XP_021993551.1 | XP_022029739.1 | 1.2506 | 1.2204 | 1.02475 |
| XP_021984766.1 | XP_022029622.1 | 1.4411 | 1.4061 | 1.02489 |
| XP_021988953.1 | XP_022010292.1 | 1.1681 | 1.1396 | 1.02501 |



|                               |        |        |         |
|-------------------------------|--------|--------|---------|
| XP_021976022.1 XP_022006668.1 | 1.4997 | 1.4627 | 1.0253  |
| XP_021989734.1 XP_021993222.1 | 1.5322 | 1.4942 | 1.02543 |
| XP_021973854.1 XP_022002417.1 | 1.2018 | 1.1719 | 1.02551 |
| XP_022026963.1 XP_022033162.1 | 1.3692 | 1.335  | 1.02562 |
| XP_021978842.1 XP_021984766.1 | 1.226  | 1.1953 | 1.02568 |
| XP_021981407.1 XP_021993622.1 | 1.5138 | 1.4757 | 1.02582 |
| XP_022006926.1 XP_035838717.1 | 1.608  | 1.5673 | 1.02597 |
| XP_021973855.1 XP_021993221.1 | 1.8503 | 1.803  | 1.02623 |
| XP_021995116.1 XP_022004979.1 | 1.6125 | 1.5712 | 1.02629 |
| XP_021992525.1 XP_022006926.1 | 1.526  | 1.4869 | 1.0263  |
| XP_021993283.1 XP_022002415.1 | 1.1782 | 1.1474 | 1.02684 |
| XP_021989737.1 XP_022022835.1 | 1.2219 | 1.1896 | 1.02715 |
| XP_022013182.1 XP_022035384.1 | 1.3382 | 1.3019 | 1.02788 |
| XP_022009213.1 XP_022037775.1 | 1.5171 | 1.4752 | 1.0284  |
| XP_021973316.1 XP_022002420.1 | 1.0981 | 1.0677 | 1.02847 |
| XP_021978842.1 XP_022039074.2 | 1.2144 | 1.1797 | 1.02941 |
| XP_022021912.1 XP_022029622.1 | 1.548  | 1.5036 | 1.02953 |
| XP_021973855.1 XP_022006668.1 | 1.9714 | 1.9129 | 1.03058 |
| XP_022002419.1 XP_022010616.1 | 0.8792 | 0.8522 | 1.03168 |
| XP_021987458.1 XP_022005608.1 | 1.2009 | 1.1635 | 1.03214 |
| XP_022026964.1 XP_035842399.1 | 1.4987 | 1.4518 | 1.0323  |
| XP_021993222.1 XP_022021914.1 | 1.6939 | 1.6396 | 1.03312 |
| XP_021973316.1 XP_022021911.1 | 1.4493 | 1.4028 | 1.03315 |
| XP_021973316.1 XP_022021914.1 | 1.4493 | 1.4028 | 1.03315 |
| XP_021992525.1 XP_021999258.1 | 1.1761 | 1.1376 | 1.03384 |
| XP_021993222.1 XP_022021911.1 | 1.6951 | 1.6395 | 1.03391 |
| XP_021993221.1 XP_021993621.2 | 0.7456 | 0.7207 | 1.03455 |
| XP_021993622.1 XP_022001254.1 | 1.4634 | 1.4145 | 1.03457 |
| XP_021976022.1 XP_021985239.1 | 1.4788 | 1.4287 | 1.03507 |
| XP_021973855.1 XP_021989736.1 | 2.0661 | 1.996  | 1.03512 |
| XP_021984766.1 XP_021992525.1 | 0.9681 | 0.9351 | 1.03529 |
| XP_021987457.1 XP_022006927.1 | 1.3341 | 1.2882 | 1.03563 |
| XP_021993220.1 XP_022010291.1 | 1.2075 | 1.1659 | 1.03568 |
| XP_021985239.1 XP_022018622.1 | 1.1297 | 1.0907 | 1.03576 |
| XP_022005608.1 XP_022006327.1 | 1.556  | 1.5021 | 1.03588 |
| XP_021981388.1 XP_021989734.1 | 0.4239 | 0.4092 | 1.03592 |
| XP_022010616.1 XP_035833070.1 | 1.8526 | 1.7879 | 1.03619 |
| XP_021993622.1 XP_022034230.1 | 1.9261 | 1.8587 | 1.03626 |
| XP_021993220.1 XP_022006927.1 | 1.423  | 1.3725 | 1.03679 |
| XP_022026964.1 XP_022029740.1 | 1.1561 | 1.114  | 1.03779 |
| XP_021984981.2 XP_022015084.1 | 1.3778 | 1.3273 | 1.03805 |
| XP_021973011.1 XP_022029622.1 | 1.2903 | 1.2429 | 1.03814 |
| XP_021973854.1 XP_022039085.1 | 1.5828 | 1.5241 | 1.03851 |
| XP_021973011.1 XP_022010292.1 | 0.9807 | 0.9442 | 1.03866 |
| XP_022010919.1 XP_022021912.1 | 1.3996 | 1.3466 | 1.03936 |
| XP_021973854.1 XP_022002416.1 | 1.212  | 1.1658 | 1.03963 |
| XP_021987457.1 XP_021993052.1 | 1.2426 | 1.1951 | 1.03975 |
| XP_021993622.1 XP_022006327.1 | 1.6203 | 1.5577 | 1.04019 |
| XP_022000224.2 XP_022013239.1 | 1.595  | 1.5332 | 1.04031 |
| XP_021973854.1 XP_021995116.1 | 1.4824 | 1.4248 | 1.04043 |
| XP_021969020.1 XP_022010101.1 | 1.5004 | 1.4412 | 1.04108 |
| XP_021978842.1 XP_022022835.1 | 1.4175 | 1.3612 | 1.04136 |
| XP_021993622.1 XP_022008275.1 | 1.6623 | 1.5962 | 1.04141 |
| XP_021973854.1 XP_021993221.1 | 1.8113 | 1.7383 | 1.042   |
| XP_021989735.1 XP_022009213.1 | 0.8285 | 0.7943 | 1.04306 |
| XP_021978842.1 XP_022006926.1 | 1.4215 | 1.3624 | 1.04338 |
| XP_021987457.1 XP_021993220.1 | 1.2992 | 1.2451 | 1.04345 |
| XP_021973855.1 XP_022022835.1 | 1.5506 | 1.486  | 1.04347 |
| XP_021981626.1 XP_022035384.1 | 1.7661 | 1.6917 | 1.04398 |
| XP_021993551.1 XP_022000224.2 | 1.6666 | 1.5958 | 1.04437 |
| XP_021973316.1 XP_021978807.1 | 1.3845 | 1.3256 | 1.04443 |
| XP_021973855.1 XP_022029740.1 | 1.4085 | 1.3484 | 1.04457 |
| XP_022013239.1 XP_022014870.1 | 1.3733 | 1.314  | 1.04513 |
| XP_021978807.1 XP_021988953.1 | 1.3856 | 1.3251 | 1.04566 |
| XP_022009213.1 XP_022014870.1 | 0.9688 | 0.9264 | 1.04577 |
| XP_021972810.1 XP_021993622.1 | 1.5479 | 1.4796 | 1.04616 |
| XP_021993283.1 XP_021995116.1 | 1.6904 | 1.6155 | 1.04636 |
| XP_021993551.1 XP_022006926.1 | 1.7663 | 1.6878 | 1.04651 |
| XP_021999258.1 XP_022022487.2 | 1.1799 | 1.1265 | 1.0474  |
| XP_021988953.1 XP_022001254.1 | 1.4229 | 1.3582 | 1.04764 |
| XP_021978807.1 XP_022029738.1 | 1.0181 | 0.9718 | 1.04764 |
| XP_021969020.1 XP_022000196.1 | 1.5465 | 1.4757 | 1.04798 |
| XP_021976022.1 XP_022000196.1 | 1.4047 | 1.3402 | 1.04813 |
| XP_021987458.1 XP_022006927.1 | 1.3255 | 1.2637 | 1.0489  |
| XP_021987458.1 XP_021993052.1 | 1.2642 | 1.2047 | 1.04939 |
| XP_021993221.1 XP_022021913.1 | 1.5431 | 1.47   | 1.04973 |
| XP_021993221.1 XP_022013560.1 | 1.4173 | 1.3495 | 1.05024 |
| XP_021973316.1 XP_022039074.2 | 1.4541 | 1.3844 | 1.05035 |
| XP_022000196.1 XP_022029738.1 | 1.1776 | 1.1211 | 1.0504  |
| XP_021992525.1 XP_022035552.1 | 0.8911 | 0.8476 | 1.05132 |
| XP_021989735.1 XP_022001254.1 | 1.2599 | 1.1982 | 1.05149 |
| XP_021993551.1 XP_022010292.1 | 1.3481 | 1.282  | 1.05156 |
| XP_021973855.1 XP_022010296.1 | 1.4719 | 1.3994 | 1.05181 |
| XP_021984981.2 XP_022018622.1 | 1.2147 | 1.1548 | 1.05187 |
| XP_021993551.1 XP_022013239.1 | 1.653  | 1.5714 | 1.05193 |
| XP_021989733.1 XP_021989734.1 | 0.081  | 0.077  | 1.05195 |
| XP_022001254.1 XP_022006926.1 | 1.2532 | 1.1911 | 1.05214 |
| XP_021992525.1 XP_021993551.1 | 1.6515 | 1.5692 | 1.05245 |

|                               |        |        |         |
|-------------------------------|--------|--------|---------|
| XP_021993551.1 XP_022029738.1 | 1.4739 | 1.3994 | 1.05324 |
| XP_021976022.1 XP_022029622.1 | 1.5783 | 1.4983 | 1.05339 |
| XP_021993220.1 XP_022021911.1 | 1.6675 | 1.5829 | 1.05345 |
| XP_021993052.1 XP_022001254.1 | 1.1287 | 1.0713 | 1.05358 |
| XP_021993220.1 XP_022013182.1 | 1.6077 | 1.5247 | 1.05444 |
| XP_021973011.1 XP_021999258.1 | 1.2637 | 1.198  | 1.05484 |
| XP_021989736.1 XP_022009213.1 | 0.7825 | 0.7417 | 1.05501 |
| XP_021984766.1 XP_022035551.1 | 1.2237 | 1.1597 | 1.05519 |
| XP_021984766.1 XP_022035552.1 | 1.2237 | 1.1597 | 1.05519 |
| XP_021976022.1 XP_021989737.1 | 1.3527 | 1.28   | 1.0568  |
| XP_021969020.1 XP_022013239.1 | 1.5109 | 1.4292 | 1.05716 |
| XP_021973855.1 XP_022013183.1 | 1.7949 | 1.6975 | 1.05738 |
| XP_022001254.1 XP_022035552.1 | 1.3905 | 1.3147 | 1.05766 |
| XP_022006927.1 XP_022018622.1 | 1.247  | 1.1786 | 1.05803 |
| XP_022002419.1 XP_022029740.1 | 0.3261 | 0.308  | 1.05877 |
| XP_021984981.2 XP_021993620.1 | 1.16   | 1.0955 | 1.05888 |
| XP_021976022.1 XP_022029740.1 | 1.2149 | 1.1468 | 1.05938 |
| XP_022006927.1 XP_022010919.1 | 1.2279 | 1.1589 | 1.05954 |
| XP_022029740.1 XP_022035551.1 | 1.2006 | 1.1331 | 1.05957 |
| XP_022029740.1 XP_022035552.1 | 1.2006 | 1.1331 | 1.05957 |
| XP_022002421.1 XP_022039085.1 | 0.7286 | 0.6876 | 1.05963 |
| XP_021989734.1 XP_021989736.1 | 0.1713 | 0.1616 | 1.06002 |
| XP_021999258.1 XP_022037775.1 | 1.4001 | 1.3198 | 1.06084 |
| XP_021989735.1 XP_022013182.1 | 1.0548 | 0.9935 | 1.0617  |
| XP_021984766.1 XP_021988229.1 | 1.3145 | 1.2377 | 1.06205 |
| XP_021976022.1 XP_021993622.1 | 1.7072 | 1.6068 | 1.06248 |
| XP_021973316.1 XP_022010101.1 | 1.285  | 1.2092 | 1.06269 |
| XP_022022487.2 XP_022026963.1 | 1.2673 | 1.1925 | 1.06273 |
| XP_021993221.1 XP_022013239.1 | 0.9505 | 0.894  | 1.0632  |
| XP_021993220.1 XP_022013183.1 | 1.5686 | 1.4749 | 1.06353 |
| XP_022006668.1 XP_035838717.1 | 1.5558 | 1.4627 | 1.06365 |
| XP_021984766.1 XP_022010295.2 | 1.0423 | 0.9798 | 1.06379 |
| XP_022009213.1 XP_022013239.1 | 1.3859 | 1.3026 | 1.06395 |
| XP_022021911.1 XP_022034230.1 | 1.1771 | 1.1061 | 1.06419 |
| XP_022021913.1 XP_022034230.1 | 1.1771 | 1.1061 | 1.06419 |
| XP_022021914.1 XP_022034230.1 | 1.1771 | 1.1061 | 1.06419 |
| XP_021989735.1 XP_035838717.1 | 0.8487 | 0.7975 | 1.0642  |
| XP_021995116.1 XP_022008276.2 | 1.4382 | 1.3514 | 1.06423 |
| XP_021981388.1 XP_021992525.1 | 0.9675 | 0.9087 | 1.06471 |
| XP_022013183.1 XP_022013560.1 | 1.4047 | 1.3188 | 1.06513 |
| XP_022001254.1 XP_022035551.1 | 1.3839 | 1.2991 | 1.06528 |
| XP_021993222.1 XP_021993622.1 | 1.0423 | 0.9779 | 1.06586 |
| XP_021989733.1 XP_022037775.1 | 1.3775 | 1.292  | 1.06618 |
| XP_021984766.1 XP_022022835.1 | 1.4061 | 1.3188 | 1.0662  |
| XP_021984981.2 XP_021989733.1 | 0.898  | 0.8421 | 1.06638 |
| XP_021988953.1 XP_022010291.1 | 1.4305 | 1.3414 | 1.06642 |
| XP_021993220.1 XP_035842399.1 | 1.9628 | 1.8404 | 1.06651 |
| XP_021973011.1 XP_022013558.1 | 0.936  | 0.8776 | 1.06655 |
| XP_021993621.2 XP_022013239.1 | 0.6744 | 0.6322 | 1.06675 |
| XP_021988953.1 XP_022022487.2 | 1.5852 | 1.4837 | 1.06841 |
| XP_021993052.1 XP_035842399.1 | 1.4586 | 1.3652 | 1.06841 |
| XP_021992525.1 XP_021993283.1 | 1.5494 | 1.4501 | 1.06848 |
| XP_022013183.1 XP_022021912.1 | 1.4066 | 1.316  | 1.06884 |
| XP_021999258.1 XP_022013183.1 | 1.2541 | 1.1733 | 1.06887 |
| XP_022010616.1 XP_022013239.1 | 1.6163 | 1.5121 | 1.06891 |
| XP_021989736.1 XP_035838717.1 | 0.7941 | 0.7425 | 1.06949 |
| XP_021993551.1 XP_022010101.1 | 1.6094 | 1.5046 | 1.06965 |
| XP_022002418.1 XP_022013239.1 | 0.9922 | 0.9272 | 1.0701  |
| XP_022026963.1 XP_022035384.1 | 1.586  | 1.482  | 1.07018 |
| XP_021988953.1 XP_035833070.1 | 1.5081 | 1.4087 | 1.07056 |
| XP_022021912.1 XP_022035551.1 | 1.5089 | 1.4089 | 1.07098 |
| XP_022021912.1 XP_022035552.1 | 1.5089 | 1.4089 | 1.07098 |
| XP_022001254.1 XP_022039074.2 | 1.4121 | 1.3174 | 1.07188 |
| XP_021981388.1 XP_021989733.1 | 0.4265 | 0.3976 | 1.07269 |
| XP_021993222.1 XP_022009213.1 | 1.6186 | 1.5081 | 1.07327 |
| XP_021989737.1 XP_021992525.1 | 1.1104 | 1.0343 | 1.07358 |
| XP_021973316.1 XP_021978842.1 | 1.5835 | 1.4743 | 1.07407 |
| XP_022009213.1 XP_035833070.1 | 1.4743 | 1.3717 | 1.0748  |
| XP_022010101.1 XP_022010919.1 | 1.4679 | 1.3652 | 1.07523 |
| XP_021987457.1 XP_035842399.1 | 1.8656 | 1.7347 | 1.07546 |
| XP_021993221.1 XP_022006668.1 | 1.5814 | 1.4703 | 1.07556 |
| XP_021993220.1 XP_022021913.1 | 1.7114 | 1.5904 | 1.07608 |
| XP_021989733.1 XP_021992525.1 | 0.9994 | 0.9281 | 1.07682 |
| XP_021999258.1 XP_022009213.1 | 1.3677 | 1.2701 | 1.07684 |
| XP_021973855.1 XP_022033162.1 | 1.5971 | 1.4826 | 1.07723 |
| XP_022006668.1 XP_022033162.1 | 1.4092 | 1.3074 | 1.07786 |
| XP_021989736.1 XP_021993222.1 | 1.5109 | 1.4013 | 1.07821 |
| XP_021993220.1 XP_022021914.1 | 1.6417 | 1.5218 | 1.07879 |
| XP_021989734.1 XP_022009213.1 | 0.8234 | 0.7632 | 1.07888 |
| XP_021973011.1 XP_022029738.1 | 1.1078 | 1.0259 | 1.07983 |
| XP_021984766.1 XP_022006927.1 | 1.4077 | 1.3034 | 1.08002 |
| XP_021993052.1 XP_022006327.1 | 1.3789 | 1.2766 | 1.08013 |
| XP_022013558.1 XP_022021912.1 | 1.2262 | 1.1348 | 1.08054 |
| XP_021984766.1 XP_021993221.1 | 2.0678 | 1.911  | 1.08205 |
| XP_021988953.1 XP_022018622.1 | 1.31   | 1.2105 | 1.0822  |
| XP_021993551.1 XP_022010295.2 | 1.415  | 1.3064 | 1.08313 |
| XP_022013239.1 XP_035838717.1 | 1.4089 | 1.3007 | 1.08319 |
| XP_021993052.1 XP_022013239.1 | 1.3323 | 1.2291 | 1.08396 |

|                |                |        |        |         |
|----------------|----------------|--------|--------|---------|
| XP_022000224.2 | XP_022006926.1 | 1.1967 | 1.1038 | 1.08416 |
| XP_021993220.1 | XP_021993620.1 | 0.7682 | 0.7085 | 1.08426 |
| XP_021987458.1 | XP_021993220.1 | 1.2966 | 1.1955 | 1.08457 |
| XP_021973316.1 | XP_021993052.1 | 1.2666 | 1.1678 | 1.0846  |
| XP_021993220.1 | XP_022005608.1 | 1.1571 | 1.0668 | 1.08465 |
| XP_021984981.2 | XP_021989734.1 | 0.8939 | 0.824  | 1.08483 |
| XP_022010919.1 | XP_022035384.1 | 1.4106 | 1.2991 | 1.08583 |
| XP_021969020.1 | XP_021999258.1 | 1.6213 | 1.4925 | 1.0863  |
| XP_022006327.1 | XP_022013558.1 | 1.1875 | 1.0929 | 1.08656 |
| XP_021978842.1 | XP_022000196.1 | 1.4361 | 1.3209 | 1.08721 |
| XP_022001254.1 | XP_022008276.2 | 1.4522 | 1.3348 | 1.08795 |
| XP_022005608.1 | XP_022013239.1 | 1.127  | 1.0346 | 1.08931 |
| XP_021993283.1 | XP_022000224.2 | 1.8042 | 1.6561 | 1.08943 |
| XP_022010291.1 | XP_022010616.1 | 0.9658 | 0.8865 | 1.08945 |
| XP_021989734.1 | XP_035838717.1 | 0.8274 | 0.7587 | 1.09055 |
| XP_021985239.1 | XP_021993221.1 | 1.4294 | 1.3104 | 1.09081 |
| XP_021973011.1 | XP_021984766.1 | 1.3988 | 1.2815 | 1.09153 |
| XP_021988953.1 | XP_022010295.2 | 1.1359 | 1.0406 | 1.09158 |
| XP_022009213.1 | XP_022013183.1 | 1.0972 | 1.0048 | 1.09196 |
| XP_021993551.1 | XP_022010296.1 | 1.3145 | 1.2033 | 1.09241 |
| XP_021973011.1 | XP_022002421.1 | 1.1465 | 1.0485 | 1.09347 |
| XP_021984981.2 | XP_022026964.1 | 1.3345 | 1.2198 | 1.09403 |
| XP_022026964.1 | XP_022035384.1 | 1.4521 | 1.3267 | 1.09452 |
| XP_021995117.1 | XP_022000196.1 | 1.3629 | 1.2452 | 1.09452 |
| XP_022005608.1 | XP_022010296.1 | 1.1006 | 1.0053 | 1.0948  |
| XP_022010101.1 | XP_022021912.1 | 1.5705 | 1.434  | 1.09519 |
| XP_021995116.1 | XP_022013183.1 | 1.4102 | 1.2876 | 1.09522 |
| XP_021992525.1 | XP_022006668.1 | 1.2392 | 1.1313 | 1.09538 |
| XP_021993283.1 | XP_021993622.1 | 2.4599 | 2.2449 | 1.09577 |
| XP_022021912.1 | XP_022034230.1 | 1.2228 | 1.1158 | 1.0959  |
| XP_021993551.1 | XP_022026964.1 | 1.3648 | 1.244  | 1.09711 |
| XP_021993622.1 | XP_022035552.1 | 1.741  | 1.5867 | 1.09725 |
| XP_021989737.1 | XP_022035384.1 | 1.3634 | 1.2416 | 1.0981  |
| XP_021969020.1 | XP_022035551.1 | 2.0299 | 1.848  | 1.09843 |
| XP_021969020.1 | XP_022035552.1 | 2.0299 | 1.848  | 1.09843 |
| XP_021985239.1 | XP_022039074.2 | 1.0643 | 0.9684 | 1.09903 |
| XP_021993622.1 | XP_022035551.1 | 1.6844 | 1.5312 | 1.10005 |
| XP_022010294.1 | XP_022013560.1 | 0.145  | 0.1318 | 1.10015 |
| XP_022022835.1 | XP_035838717.1 | 1.1995 | 1.0899 | 1.10056 |
| XP_021989733.1 | XP_021993222.1 | 1.6321 | 1.4829 | 1.10061 |
| XP_021986500.1 | XP_022000224.2 | 1.5998 | 1.4524 | 1.10149 |
| XP_022005608.1 | XP_022035384.1 | 1.2845 | 1.1655 | 1.1021  |
| XP_021978842.1 | XP_022035551.1 | 1.2984 | 1.1772 | 1.10296 |
| XP_021978842.1 | XP_022035552.1 | 1.2984 | 1.1772 | 1.10296 |
| XP_021993622.1 | XP_022010292.1 | 1.3557 | 1.2289 | 1.10318 |
| XP_021988229.1 | XP_021993221.1 | 1.6683 | 1.5122 | 1.10323 |
| XP_022010295.2 | XP_022013182.1 | 1.4766 | 1.338  | 1.10359 |
| XP_021993220.1 | XP_022035384.1 | 1.6515 | 1.4956 | 1.10424 |
| XP_022006927.1 | XP_022013183.1 | 1.4638 | 1.3249 | 1.10484 |
| XP_021993222.1 | XP_022013239.1 | 1.4353 | 1.2981 | 1.10569 |
| XP_021981395.1 | XP_021989734.1 | 0.4348 | 0.3932 | 1.1058  |
| XP_022006327.1 | XP_022006668.1 | 1.5562 | 1.4066 | 1.10636 |
| XP_021978807.1 | XP_022002421.1 | 1.1009 | 0.995  | 1.10643 |
| XP_021976022.1 | XP_022000224.2 | 1.2208 | 1.1032 | 1.1066  |
| XP_021986500.1 | XP_022037775.1 | 0.7457 | 0.6735 | 1.1072  |
| XP_021973855.1 | XP_021995117.1 | 1.7851 | 1.6119 | 1.10745 |
| XP_021972810.1 | XP_022035384.1 | 1.5368 | 1.3876 | 1.10752 |
| XP_021999258.1 | XP_022013182.1 | 1.2179 | 1.0995 | 1.10769 |
| XP_021976022.1 | XP_021981626.1 | 1.7249 | 1.5548 | 1.1094  |
| XP_022005608.1 | XP_022029740.1 | 0.9849 | 0.8872 | 1.11012 |
| XP_021981407.1 | XP_021989736.1 | 0.4254 | 0.3831 | 1.11042 |
| XP_021981407.1 | XP_021989734.1 | 0.383  | 0.3449 | 1.11047 |
| XP_022013239.1 | XP_022039085.1 | 1.4248 | 1.283  | 1.11052 |
| XP_021993551.1 | XP_022018622.1 | 1.5929 | 1.4315 | 1.11275 |
| XP_022001254.1 | XP_022013239.1 | 1.3886 | 1.2478 | 1.11284 |
| XP_021992525.1 | XP_035838717.1 | 0.9852 | 0.8844 | 1.11398 |
| XP_021973316.1 | XP_022015084.1 | 1.8055 | 1.6193 | 1.11499 |
| XP_021976022.1 | XP_022002421.1 | 1.3877 | 1.2444 | 1.11516 |
| XP_021973854.1 | XP_022029740.1 | 1.1691 | 1.0481 | 1.11545 |
| XP_021973855.1 | XP_022010101.1 | 1.385  | 1.2404 | 1.11658 |
| XP_021989737.1 | XP_022037775.1 | 1.327  | 1.1883 | 1.11672 |
| XP_021985239.1 | XP_022001254.1 | 1.5347 | 1.3742 | 1.1168  |
| XP_021973854.1 | XP_021993621.2 | 1.7708 | 1.585  | 1.11722 |
| XP_021993052.1 | XP_022035551.1 | 1.4315 | 1.2808 | 1.11766 |
| XP_021993052.1 | XP_022035552.1 | 1.4315 | 1.2808 | 1.11766 |
| XP_021981626.1 | XP_022022487.2 | 1.2767 | 1.1418 | 1.11815 |
| XP_021993220.1 | XP_022018622.1 | 1.2449 | 1.112  | 1.11951 |
| XP_021981626.1 | XP_022000196.1 | 1.7114 | 1.5286 | 1.11959 |
| XP_022006927.1 | XP_035838717.1 | 1.4091 | 1.258  | 1.12011 |
| XP_021973855.1 | XP_022029622.1 | 1.7583 | 1.5689 | 1.12072 |
| XP_021993551.1 | XP_021995117.1 | 1.2673 | 1.1306 | 1.12091 |
| XP_021989734.1 | XP_022013182.1 | 1.0057 | 0.8972 | 1.12093 |
| XP_021993221.1 | XP_022026964.1 | 1.1128 | 0.9921 | 1.12166 |
| XP_021984981.2 | XP_021999258.1 | 1.2191 | 1.0865 | 1.12204 |
| XP_021993283.1 | XP_022014870.1 | 1.5479 | 1.3789 | 1.12256 |
| XP_022009213.1 | XP_022013182.1 | 1.0883 | 0.9694 | 1.12265 |
| XP_022029738.1 | XP_022029740.1 | 0.5365 | 0.4778 | 1.12285 |
| XP_021973011.1 | XP_021973316.1 | 1.4919 | 1.3279 | 1.1235  |

|                               |        |        |         |
|-------------------------------|--------|--------|---------|
| XP_021993551.1 XP_022010294.1 | 1.3457 | 1.1962 | 1.12498 |
| XP_022010294.1 XP_035833070.1 | 1.4288 | 1.2697 | 1.12531 |
| XP_021978807.1 XP_022006926.1 | 1.0278 | 0.9129 | 1.12586 |
| XP_021993222.1 XP_022010616.1 | 1.3821 | 1.2271 | 1.12631 |
| XP_021993052.1 XP_022013182.1 | 1.4494 | 1.2863 | 1.1268  |
| XP_021993221.1 XP_022022835.1 | 1.4078 | 1.2486 | 1.1275  |
| XP_022008275.1 XP_035833070.1 | 1.4153 | 1.2552 | 1.12755 |
| XP_022000224.2 XP_022014870.1 | 1.1334 | 1.0051 | 1.12765 |
| XP_021993283.1 XP_022035551.1 | 1.9149 | 1.6981 | 1.12767 |
| XP_021993283.1 XP_022035552.1 | 1.9149 | 1.6981 | 1.12767 |
| XP_021993622.1 XP_035835830.1 | 1.2444 | 1.1032 | 1.12799 |
| XP_022022835.1 XP_022037775.1 | 1.4061 | 1.2458 | 1.12867 |
| XP_021978842.1 XP_035833070.1 | 1.6675 | 1.4773 | 1.12875 |
| XP_022005608.1 XP_035833070.1 | 1.478  | 1.3089 | 1.12919 |
| XP_021987458.1 XP_035842399.1 | 1.8914 | 1.675  | 1.12919 |
| XP_021973855.1 XP_021993222.1 | 2.103  | 1.8618 | 1.12955 |
| XP_021973316.1 XP_022010919.1 | 1.7954 | 1.5885 | 1.13025 |
| XP_021988953.1 XP_022033162.1 | 1.3831 | 1.2227 | 1.13119 |
| XP_021993052.1 XP_022000224.2 | 1.3124 | 1.16   | 1.13138 |
| XP_021992525.1 XP_022029622.1 | 1.3842 | 1.2227 | 1.13208 |
| XP_021989733.1 XP_022013182.1 | 0.9993 | 0.8825 | 1.13235 |
| XP_021989736.1 XP_021999258.1 | 1.5049 | 1.3289 | 1.13244 |
| XP_021969020.1 XP_021995116.1 | 1.9375 | 1.7109 | 1.13244 |
| XP_021993620.1 XP_022018622.1 | 1.0754 | 0.9485 | 1.13379 |
| XP_021988953.1 XP_021993621.2 | 1.4101 | 1.2437 | 1.13379 |
| XP_022005608.1 XP_035842399.1 | 1.7545 | 1.5473 | 1.13391 |
| XP_021993283.1 XP_022039085.1 | 1.6751 | 1.4767 | 1.13435 |
| XP_021993220.1 XP_022013239.1 | 0.9611 | 0.8472 | 1.13444 |
| XP_021993283.1 XP_021995117.1 | 1.4003 | 1.2316 | 1.13698 |
| XP_021993221.1 XP_022010101.1 | 1.7671 | 1.5539 | 1.1372  |
| XP_022009213.1 XP_022022835.1 | 1.2601 | 1.1075 | 1.13779 |
| XP_021993283.1 XP_021993621.2 | 2.8498 | 2.5028 | 1.13864 |
| XP_021989734.1 XP_021993283.1 | 1.3466 | 1.1822 | 1.13906 |
| XP_021989734.1 XP_022013183.1 | 0.9929 | 0.8716 | 1.13917 |
| XP_021993220.1 XP_022010919.1 | 1.5593 | 1.3688 | 1.13917 |
| XP_021993220.1 XP_022006668.1 | 1.7462 | 1.5325 | 1.13945 |
| XP_022005608.1 XP_022013560.1 | 1.0968 | 0.9612 | 1.14107 |
| XP_021985239.1 XP_022010919.1 | 1.1325 | 0.9921 | 1.14152 |
| XP_022034230.1 XP_022035384.1 | 1.7732 | 1.5526 | 1.14208 |
| XP_021981407.1 XP_022039074.2 | 1.2919 | 1.1309 | 1.14236 |
| XP_022000224.2 XP_022026964.1 | 1.8498 | 1.6179 | 1.14333 |
| XP_022000224.2 XP_022010616.1 | 1.2914 | 1.1281 | 1.14476 |
| XP_021973855.1 XP_022002417.1 | 1.7718 | 1.5474 | 1.14502 |
| XP_022006926.1 XP_022009213.1 | 1.6273 | 1.4204 | 1.14566 |
| XP_021989735.1 XP_022037775.1 | 1.3718 | 1.1967 | 1.14632 |
| XP_021969020.1 XP_021973854.1 | 1.9267 | 1.6781 | 1.14814 |
| XP_021981395.1 XP_021993221.1 | 1.4349 | 1.2495 | 1.14838 |
| XP_022000196.1 XP_022029739.1 | 1.1212 | 0.9751 | 1.14983 |
| XP_021989735.1 XP_022013183.1 | 1.0624 | 0.9237 | 1.15016 |
| XP_021989733.1 XP_022013183.1 | 0.9863 | 0.8574 | 1.15034 |
| XP_022021911.1 XP_022021912.1 | 0.0872 | 0.0756 | 1.15344 |
| XP_022021912.1 XP_022021913.1 | 0.0872 | 0.0756 | 1.15344 |
| XP_022021912.1 XP_022021914.1 | 0.0872 | 0.0756 | 1.15344 |
| XP_021973855.1 XP_021981626.1 | 2.2499 | 1.9461 | 1.15611 |
| XP_022006668.1 XP_022026964.1 | 1.2836 | 1.1093 | 1.15713 |
| XP_021981388.1 XP_022013182.1 | 1.0354 | 0.8944 | 1.15765 |
| XP_022006927.1 XP_022009213.1 | 1.4104 | 1.2181 | 1.15787 |
| XP_022000196.1 XP_022022487.2 | 1.4438 | 1.2469 | 1.15791 |
| XP_021993052.1 XP_022013183.1 | 1.4588 | 1.2595 | 1.15824 |
| XP_021993283.1 XP_022010295.2 | 1.3913 | 1.2002 | 1.15922 |
| XP_021969020.1 XP_022029739.1 | 1.4623 | 1.2587 | 1.16175 |
| XP_021984766.1 XP_022013182.1 | 0.9844 | 0.8463 | 1.16318 |
| XP_022035551.1 XP_022037775.1 | 1.5147 | 1.2979 | 1.16704 |
| XP_022035552.1 XP_022037775.1 | 1.5147 | 1.2979 | 1.16704 |
| XP_021993283.1 XP_022002418.1 | 1.2857 | 1.1012 | 1.16754 |
| XP_021993621.2 XP_022006327.1 | 1.4811 | 1.2685 | 1.1676  |
| XP_021976022.1 XP_022026964.1 | 1.4169 | 1.212  | 1.16906 |
| XP_021973855.1 XP_022002419.1 | 1.8139 | 1.5514 | 1.1692  |
| XP_021995116.1 XP_022026964.1 | 1.2467 | 1.0652 | 1.17039 |
| XP_022006327.1 XP_022013239.1 | 1.7437 | 1.4894 | 1.17074 |
| XP_021993052.1 XP_022010919.1 | 1.372  | 1.1718 | 1.17085 |
| XP_022026963.1 XP_022037775.1 | 1.7088 | 1.4594 | 1.17089 |
| XP_021973316.1 XP_022021912.1 | 1.5051 | 1.2852 | 1.1711  |
| XP_022005608.1 XP_022006668.1 | 1.7081 | 1.4579 | 1.17162 |
| XP_021989736.1 XP_021992525.1 | 1.0488 | 0.8928 | 1.17473 |
| XP_022006668.1 XP_022010919.1 | 1.2019 | 1.023  | 1.17488 |
| XP_021976022.1 XP_022013183.1 | 1.3495 | 1.1479 | 1.17563 |
| XP_021993283.1 XP_022037775.1 | 1.5172 | 1.2893 | 1.17676 |
| XP_021988953.1 XP_022039074.2 | 1.2178 | 1.0344 | 1.1773  |
| XP_021985239.1 XP_022010616.1 | 1.0923 | 0.9274 | 1.17781 |
| XP_022000224.2 XP_022004979.1 | 1.555  | 1.3184 | 1.17946 |
| XP_021978807.1 XP_022001254.1 | 1.4051 | 1.1913 | 1.17947 |
| XP_021973854.1 XP_021993283.1 | 2.208  | 1.8718 | 1.17961 |
| XP_021973316.1 XP_022004980.1 | 1.7108 | 1.4501 | 1.17978 |
| XP_022005608.1 XP_022010292.1 | 1.1647 | 0.9868 | 1.18028 |
| XP_021968895.1 XP_035842399.1 | 1.6724 | 1.4153 | 1.18166 |
| XP_021993621.2 XP_022026963.1 | 1.0185 | 0.8615 | 1.18224 |
| XP_021972810.1 XP_021978842.1 | 1.5682 | 1.3256 | 1.18301 |

|                |                |        |        |         |
|----------------|----------------|--------|--------|---------|
| XP_022013239.1 | XP_022026964.1 | 1.1313 | 0.9546 | 1.1851  |
| XP_021993221.1 | XP_022010616.1 | 1.3956 | 1.1772 | 1.18552 |
| XP_022006668.1 | XP_022009213.1 | 1.5311 | 1.2901 | 1.18681 |
| XP_021981395.1 | XP_022013182.1 | 1.1095 | 0.9342 | 1.18765 |
| XP_021984766.1 | XP_021993052.1 | 1.3487 | 1.1337 | 1.18964 |
| XP_021978807.1 | XP_022018622.1 | 1.3297 | 1.1175 | 1.18989 |
| XP_021993220.1 | XP_021993283.1 | 1.9854 | 1.6678 | 1.19043 |
| XP_021993621.2 | XP_022018622.1 | 1.1666 | 0.9799 | 1.19053 |
| XP_021993221.1 | XP_022010919.1 | 1.3549 | 1.1377 | 1.19091 |
| XP_022006327.1 | XP_035833070.1 | 1.9551 | 1.6416 | 1.19097 |
| XP_021976022.1 | XP_021992525.1 | 1.3451 | 1.1292 | 1.1912  |
| XP_021978807.1 | XP_021993052.1 | 0.9817 | 0.824  | 1.19138 |
| XP_021995116.1 | XP_022000196.1 | 1.3091 | 1.0984 | 1.19182 |
| XP_022010919.1 | XP_022018622.1 | 1.2152 | 1.0186 | 1.19301 |
| XP_021993551.1 | XP_021993621.2 | 1.6644 | 1.3951 | 1.19303 |
| XP_021993220.1 | XP_021995116.1 | 1.1989 | 1.0049 | 1.19305 |
| XP_021984766.1 | XP_022013183.1 | 1.0526 | 0.8801 | 1.196   |
| XP_021993222.1 | XP_022018622.1 | 1.549  | 1.2941 | 1.19697 |
| XP_021993222.1 | XP_021999258.1 | 1.9237 | 1.6057 | 1.19804 |
| XP_021973855.1 | XP_021993620.1 | 1.5705 | 1.3096 | 1.19922 |
| XP_021989737.1 | XP_021993220.1 | 1.6416 | 1.3684 | 1.19965 |
| XP_021968895.1 | XP_021973855.1 | 1.4204 | 1.1831 | 1.20057 |
| XP_021988953.1 | XP_021993222.1 | 1.7397 | 1.4474 | 1.20195 |
| XP_021993283.1 | XP_022004980.1 | 1.6718 | 1.3901 | 1.20265 |
| XP_022035384.1 | XP_035838717.1 | 1.3164 | 1.0945 | 1.20274 |
| XP_021993283.1 | XP_022002416.1 | 1.2624 | 1.0495 | 1.20286 |
| XP_021986500.1 | XP_022013182.1 | 1.2506 | 1.0378 | 1.20505 |
| XP_021973855.1 | XP_022010294.1 | 1.5112 | 1.254  | 1.2051  |
| XP_022013182.1 | XP_022013560.1 | 1.428  | 1.1834 | 1.20669 |
| XP_022001254.1 | XP_022037775.1 | 1.188  | 0.9834 | 1.20805 |
| XP_022005608.1 | XP_022022487.2 | 1.3333 | 1.1029 | 1.2089  |
| XP_021984981.2 | XP_022037775.1 | 1.3175 | 1.0894 | 1.20938 |
| XP_021993221.1 | XP_022001254.1 | 1.5761 | 1.3029 | 1.20969 |
| XP_021976022.1 | XP_022022487.2 | 1.5343 | 1.2681 | 1.20992 |
| XP_021999258.1 | XP_022006927.1 | 1.3569 | 1.1214 | 1.21001 |
| XP_021993221.1 | XP_022005608.1 | 1.523  | 1.2585 | 1.21017 |
| XP_021993283.1 | XP_022026963.1 | 1.4049 | 1.1602 | 1.21091 |
| XP_021988953.1 | XP_022010101.1 | 1.5755 | 1.301  | 1.21099 |
| XP_021972810.1 | XP_021993052.1 | 1.2339 | 1.0167 | 1.21363 |
| XP_021992525.1 | XP_022001254.1 | 1.5151 | 1.2474 | 1.21461 |
| XP_021989735.1 | XP_021993622.1 | 2.005  | 1.6479 | 1.2167  |
| XP_035833070.1 | XP_035838717.1 | 1.6316 | 1.3408 | 1.21689 |
| XP_021989737.1 | XP_022013182.1 | 1.0861 | 0.892  | 1.2176  |
| XP_021993221.1 | XP_022010291.1 | 1.4038 | 1.1527 | 1.21784 |
| XP_022002415.1 | XP_022002418.1 | 0.0531 | 0.0435 | 1.22069 |
| XP_021973854.1 | XP_022005608.1 | 1.8616 | 1.5244 | 1.2212  |
| XP_021969020.1 | XP_035842399.1 | 1.9459 | 1.5933 | 1.2213  |
| XP_021988953.1 | XP_022006926.1 | 1.3438 | 1.0998 | 1.22186 |
| XP_021984981.2 | XP_022035384.1 | 1.5342 | 1.2555 | 1.22198 |
| XP_021976022.1 | XP_022006927.1 | 1.424  | 1.1652 | 1.22211 |
| XP_022006927.1 | XP_022022487.2 | 1.324  | 1.0831 | 1.22242 |
| XP_021989736.1 | XP_021993622.1 | 1.8155 | 1.4851 | 1.22248 |
| XP_021989736.1 | XP_022013182.1 | 1.0995 | 0.8986 | 1.22357 |
| XP_022002416.1 | XP_022002418.1 | 0.0454 | 0.0371 | 1.22372 |
| XP_021973855.1 | XP_022010291.1 | 1.4022 | 1.144  | 1.2257  |
| XP_021973855.1 | XP_022013558.1 | 1.4022 | 1.1438 | 1.22591 |
| XP_021973316.1 | XP_022029739.1 | 1.2854 | 1.0481 | 1.22641 |
| XP_021981388.1 | XP_022013183.1 | 1.0222 | 0.8324 | 1.22802 |
| XP_021981388.1 | XP_021993221.1 | 1.5253 | 1.2419 | 1.2282  |
| XP_021976022.1 | XP_022010919.1 | 1.6464 | 1.3398 | 1.22884 |
| XP_021972810.1 | XP_021993283.1 | 1.6579 | 1.3485 | 1.22944 |
| XP_022029738.1 | XP_022029739.1 | 0.2131 | 0.1733 | 1.22966 |
| XP_021993283.1 | XP_022002421.1 | 1.3877 | 1.1273 | 1.23099 |
| XP_021989737.1 | XP_021993283.1 | 1.4033 | 1.1398 | 1.23118 |
| XP_021989737.1 | XP_021993622.1 | 1.7438 | 1.4153 | 1.23211 |
| XP_021995116.1 | XP_035842399.1 | 1.6612 | 1.3474 | 1.23289 |
| XP_021978807.1 | XP_022006927.1 | 1.0712 | 0.8688 | 1.23297 |
| XP_021993620.1 | XP_022026964.1 | 1.1629 | 0.9418 | 1.23476 |
| XP_021976022.1 | XP_022013182.1 | 1.4141 | 1.1444 | 1.23567 |
| XP_022013239.1 | XP_022021911.1 | 1.6629 | 1.3438 | 1.23746 |
| XP_022006927.1 | XP_022035384.1 | 1.5167 | 1.2252 | 1.23792 |
| XP_021993220.1 | XP_022026964.1 | 1.2047 | 0.9731 | 1.238   |
| XP_021973855.1 | XP_021987458.1 | 1.758  | 1.4196 | 1.23838 |
| XP_021993052.1 | XP_022014870.1 | 1.2676 | 1.0234 | 1.23862 |
| XP_022005608.1 | XP_022010291.1 | 1.1856 | 0.9564 | 1.23965 |
| XP_021973855.1 | XP_021987457.1 | 1.7395 | 1.4024 | 1.24037 |
| XP_021973855.1 | XP_022035384.1 | 1.798  | 1.4495 | 1.24043 |
| XP_021981626.1 | XP_021984766.1 | 1.3537 | 1.0911 | 1.24067 |
| XP_022006927.1 | XP_022010616.1 | 0.8947 | 0.7202 | 1.24229 |
| XP_021999258.1 | XP_022039085.1 | 1.6893 | 1.3596 | 1.2425  |
| XP_021987457.1 | XP_022022835.1 | 1.2295 | 0.9895 | 1.24255 |
| XP_021987458.1 | XP_022022835.1 | 1.2086 | 0.9679 | 1.24868 |
| XP_021973855.1 | XP_022029739.1 | 1.9991 | 1.6005 | 1.24905 |
| XP_021993220.1 | XP_021993621.2 | 0.6004 | 0.4799 | 1.25109 |
| XP_021992525.1 | XP_021993221.1 | 1.5147 | 1.2084 | 1.25348 |
| XP_021993221.1 | XP_022004980.1 | 1.4187 | 1.1318 | 1.25349 |
| XP_022029622.1 | XP_035842399.1 | 1.9483 | 1.5506 | 1.25648 |
| XP_022006927.1 | XP_022013182.1 | 1.5299 | 1.2157 | 1.25845 |

|                |                |        |        |         |
|----------------|----------------|--------|--------|---------|
| XP_022013239.1 | XP_022021914.1 | 1.6552 | 1.3149 | 1.2588  |
| XP_021973855.1 | XP_021985239.1 | 1.8572 | 1.4744 | 1.25963 |
| XP_021988953.1 | XP_021993551.1 | 1.7028 | 1.3515 | 1.25993 |
| XP_022010291.1 | XP_022010919.1 | 1.1273 | 0.8943 | 1.26054 |
| XP_021976022.1 | XP_022039074.2 | 1.2616 | 1.0007 | 1.26072 |
| XP_022001254.1 | XP_022006927.1 | 1.2586 | 0.9967 | 1.26277 |
| XP_022000224.2 | XP_022006927.1 | 1.3314 | 1.0512 | 1.26655 |
| XP_021986500.1 | XP_021993221.1 | 1.3619 | 1.0744 | 1.26759 |
| XP_022004455.1 | XP_022035384.1 | 1.4755 | 1.1639 | 1.26772 |
| XP_021981395.1 | XP_022013183.1 | 1.0929 | 0.8619 | 1.26801 |
| XP_022002421.1 | XP_022004455.1 | 0.2474 | 0.1949 | 1.26937 |
| XP_021976022.1 | XP_022037775.1 | 1.2387 | 0.9752 | 1.2702  |
| XP_021973011.1 | XP_021976022.1 | 1.4915 | 1.1736 | 1.27088 |
| XP_022013239.1 | XP_022021913.1 | 1.7106 | 1.3449 | 1.27192 |
| XP_022013239.1 | XP_022021912.1 | 1.7847 | 1.4031 | 1.27197 |
| XP_022029622.1 | XP_022034230.1 | 1.5157 | 1.1913 | 1.27231 |
| XP_021993283.1 | XP_022026964.1 | 1.3904 | 1.0928 | 1.27233 |
| XP_022009213.1 | XP_022035384.1 | 1.3028 | 1.0233 | 1.27314 |
| XP_021985239.1 | XP_021993283.1 | 1.8598 | 1.4582 | 1.27541 |
| XP_021986500.1 | XP_022013183.1 | 1.3276 | 1.0407 | 1.27568 |
| XP_021968895.1 | XP_021995117.1 | 1.1981 | 0.9379 | 1.27743 |
| XP_021995116.1 | XP_022013239.1 | 1.3255 | 1.037  | 1.27821 |
| XP_021973011.1 | XP_022010919.1 | 1.353  | 1.0553 | 1.2821  |
| XP_021969020.1 | XP_022026963.1 | 1.6841 | 1.3135 | 1.28215 |
| XP_022001254.1 | XP_022013183.1 | 1.421  | 1.1082 | 1.28226 |
| XP_021976022.1 | XP_022021912.1 | 1.9888 | 1.5501 | 1.28301 |
| XP_021978807.1 | XP_022029739.1 | 1.1683 | 0.9104 | 1.28328 |
| XP_021973855.1 | XP_022001254.1 | 2.1952 | 1.7098 | 1.28389 |
| XP_021986500.1 | XP_022035551.1 | 1.3673 | 1.0649 | 1.28397 |
| XP_021986500.1 | XP_022035552.1 | 1.3673 | 1.0649 | 1.28397 |
| XP_021973855.1 | XP_022002420.1 | 1.4435 | 1.1241 | 1.28414 |
| XP_021993621.2 | XP_022005608.1 | 1.3642 | 1.0616 | 1.28504 |
| XP_021989734.1 | XP_021993221.1 | 1.4905 | 1.1587 | 1.28636 |
| XP_022005608.1 | XP_022010294.1 | 1.1599 | 0.9009 | 1.28749 |
| XP_022000196.1 | XP_022006926.1 | 1.5705 | 1.2187 | 1.28867 |
| XP_021989736.1 | XP_022037775.1 | 1.4283 | 1.1076 | 1.28954 |
| XP_021993221.1 | XP_035833070.1 | 1.5323 | 1.1871 | 1.29079 |
| XP_021993551.1 | XP_021993622.1 | 1.8734 | 1.4482 | 1.29361 |
| XP_021993551.1 | XP_022010919.1 | 1.7366 | 1.3413 | 1.29471 |
| XP_021987457.1 | XP_021993221.1 | 1.5681 | 1.2096 | 1.29638 |
| XP_021993221.1 | XP_022026963.1 | 1.522  | 1.1725 | 1.29808 |
| XP_021973855.1 | XP_022002418.1 | 1.5664 | 1.205  | 1.29992 |
| XP_021981388.1 | XP_021993622.1 | 1.5484 | 1.1902 | 1.30096 |
| XP_021989736.1 | XP_021993283.1 | 1.2967 | 0.9952 | 1.30295 |
| XP_021989737.1 | XP_022013183.1 | 1.0847 | 0.8316 | 1.30435 |
| XP_021973316.1 | XP_022026964.1 | 1.444  | 1.1068 | 1.30466 |
| XP_021988953.1 | XP_021993622.1 | 1.7942 | 1.3748 | 1.30506 |
| XP_021986500.1 | XP_021993283.1 | 1.5583 | 1.1931 | 1.30609 |
| XP_021973855.1 | XP_022006327.1 | 0.9877 | 0.7553 | 1.30769 |
| XP_021989733.1 | XP_021993221.1 | 1.4427 | 1.1029 | 1.3081  |
| XP_021993221.1 | XP_021993283.1 | 1.9006 | 1.4527 | 1.30832 |
| XP_022005608.1 | XP_022013558.1 | 1.1618 | 0.8865 | 1.31055 |
| XP_021989736.1 | XP_022013183.1 | 1.098  | 0.8374 | 1.3112  |
| XP_021973855.1 | XP_021993551.1 | 2.2016 | 1.6776 | 1.31235 |
| XP_021973316.1 | XP_021976022.1 | 1.6591 | 1.2638 | 1.31279 |
| XP_021989737.1 | XP_021993221.1 | 1.5144 | 1.147  | 1.32031 |
| XP_022001254.1 | XP_022013182.1 | 1.3916 | 1.0538 | 1.32055 |
| XP_021989733.1 | XP_021993622.1 | 1.7392 | 1.3169 | 1.32068 |
| XP_021992525.1 | XP_022009213.1 | 0.9995 | 0.7567 | 1.32087 |
| XP_021993283.1 | XP_022006927.1 | 1.6148 | 1.2219 | 1.32155 |
| XP_021993221.1 | XP_022006327.1 | 1.8203 | 1.3772 | 1.32174 |
| XP_021993220.1 | XP_022037775.1 | 1.8916 | 1.4307 | 1.32215 |
| XP_021973855.1 | XP_022013560.1 | 1.3937 | 1.0538 | 1.32255 |
| XP_021984981.2 | XP_021993220.1 | 1.5772 | 1.1925 | 1.3226  |
| XP_021989736.1 | XP_021993221.1 | 1.5233 | 1.1485 | 1.32634 |
| XP_021989733.1 | XP_021993283.1 | 1.3807 | 1.0397 | 1.32798 |
| XP_021993220.1 | XP_022009213.1 | 1.437  | 1.0818 | 1.32834 |
| XP_022005608.1 | XP_022010919.1 | 1.2896 | 0.9688 | 1.33113 |
| XP_021993283.1 | XP_022004455.1 | 1.5456 | 1.1593 | 1.33322 |
| XP_021999258.1 | XP_022035384.1 | 1.5264 | 1.1432 | 1.3352  |
| XP_021981407.1 | XP_021993221.1 | 1.3999 | 1.0477 | 1.33616 |
| XP_021976022.1 | XP_021993221.1 | 1.5036 | 1.1252 | 1.3363  |
| XP_021992525.1 | XP_021993220.1 | 1.691  | 1.2652 | 1.33655 |
| XP_022006327.1 | XP_022010291.1 | 1.4371 | 1.0731 | 1.3392  |
| XP_021981395.1 | XP_022022487.2 | 1.3893 | 1.0359 | 1.34115 |
| XP_021993283.1 | XP_022029738.1 | 1.8226 | 1.3587 | 1.34143 |
| XP_022021911.1 | XP_022026963.1 | 1.6513 | 1.2297 | 1.34285 |
| XP_022021913.1 | XP_022026963.1 | 1.6513 | 1.2297 | 1.34285 |
| XP_022021914.1 | XP_022026963.1 | 1.6513 | 1.2297 | 1.34285 |
| XP_021993622.1 | XP_022039085.1 | 1.9598 | 1.4586 | 1.34362 |
| XP_021984766.1 | XP_022005608.1 | 1.0606 | 0.7891 | 1.34406 |
| XP_021993220.1 | XP_035838717.1 | 1.3691 | 1.0173 | 1.34582 |
| XP_021993283.1 | XP_022002417.1 | 1.3637 | 1.0107 | 1.34926 |
| XP_021973855.1 | XP_035835830.1 | 1.3715 | 1.0163 | 1.3495  |
| XP_021973316.1 | XP_022005608.1 | 1.4567 | 1.073  | 1.3576  |
| XP_022004979.1 | XP_022014870.1 | 1.5648 | 1.1522 | 1.3581  |
| XP_021973855.1 | XP_022005608.1 | 1.9806 | 1.458  | 1.35844 |
| XP_022029622.1 | XP_022035551.1 | 1.5323 | 1.1274 | 1.35914 |

|                               |        |        |         |
|-------------------------------|--------|--------|---------|
| XP_022029622.1 XP_022035552.1 | 1.5323 | 1.1274 | 1.35914 |
| XP_021981395.1 XP_021993622.1 | 1.6846 | 1.2383 | 1.36041 |
| XP_021993622.1 XP_022006927.1 | 1.7554 | 1.2866 | 1.36437 |
| XP_021993622.1 XP_022009213.1 | 1.6714 | 1.2087 | 1.38281 |
| XP_022004979.1 XP_022022487.2 | 1.4607 | 1.0562 | 1.38298 |
| XP_021973854.1 XP_035833070.1 | 2.3476 | 1.6907 | 1.38854 |
| XP_021993221.1 XP_022013183.1 | 1.67   | 1.1996 | 1.39213 |
| XP_022022487.2 XP_022034230.1 | 1.2755 | 0.9156 | 1.39308 |
| XP_021976022.1 XP_021993220.1 | 1.6935 | 1.215  | 1.39383 |
| XP_021972810.1 XP_022005608.1 | 1.5069 | 1.0798 | 1.39554 |
| XP_021986500.1 XP_021993222.1 | 1.47   | 1.053  | 1.39601 |
| XP_022010919.1 XP_035833070.1 | 1.9484 | 1.3946 | 1.3971  |
| XP_021973316.1 XP_022013239.1 | 1.52   | 1.0868 | 1.3986  |
| XP_021973855.1 XP_022034230.1 | 1.8737 | 1.3396 | 1.3987  |
| XP_021993283.1 XP_022029740.1 | 1.4269 | 1.0198 | 1.3992  |
| XP_021989734.1 XP_021993622.1 | 1.8812 | 1.3427 | 1.40106 |
| XP_021973855.1 XP_022002415.1 | 1.593  | 1.1363 | 1.40192 |
| XP_022006927.1 XP_022022835.1 | 1.5205 | 1.0826 | 1.40449 |
| XP_021993551.1 XP_022005608.1 | 1.7734 | 1.2593 | 1.40824 |
| XP_021989734.1 XP_022037775.1 | 1.3406 | 0.9516 | 1.40879 |
| XP_021969020.1 XP_021993052.1 | 1.1488 | 0.8146 | 1.41026 |
| XP_021973316.1 XP_021993283.1 | 1.6583 | 1.173  | 1.41373 |
| XP_021992525.1 XP_022006927.1 | 1.4275 | 1.0094 | 1.41421 |
| XP_021993551.1 XP_022026963.1 | 1.743  | 1.2324 | 1.41431 |
| XP_021973855.1 XP_022002416.1 | 1.6242 | 1.1481 | 1.41469 |
| XP_021973855.1 XP_022039085.1 | 1.7578 | 1.2421 | 1.41518 |
| XP_021993622.1 XP_035838717.1 | 1.6289 | 1.1447 | 1.42299 |
| XP_021988229.1 XP_021993052.1 | 1.5756 | 1.1009 | 1.43119 |
| XP_021973011.1 XP_021973855.1 | 1.674  | 1.1694 | 1.4315  |
| XP_021976022.1 XP_021999258.1 | 0.8889 | 0.6191 | 1.43579 |
| XP_021978842.1 XP_022029738.1 | 1.0551 | 0.7316 | 1.44218 |
| XP_021984766.1 XP_021993622.1 | 2.1973 | 1.5213 | 1.44436 |
| XP_021987458.1 XP_021993221.1 | 1.6252 | 1.1252 | 1.44437 |
| XP_021973855.1 XP_022010295.2 | 1.5091 | 1.0441 | 1.44536 |
| XP_021984981.2 XP_021993221.1 | 1.4811 | 1.0219 | 1.44936 |
| XP_021989735.1 XP_021993221.1 | 1.6003 | 1.1031 | 1.45073 |
| XP_021976022.1 XP_021993283.1 | 2.017  | 1.3818 | 1.45969 |
| XP_021993221.1 XP_022013182.1 | 1.6292 | 1.1155 | 1.46051 |
| XP_021976022.1 XP_022005608.1 | 1.3455 | 0.9199 | 1.46266 |
| XP_021973854.1 XP_022010291.1 | 1.4696 | 1.0046 | 1.46287 |
| XP_021985239.1 XP_021993052.1 | 1.4047 | 0.9585 | 1.46552 |
| XP_021976022.1 XP_022014870.1 | 1.5523 | 1.0591 | 1.46568 |
| XP_021972810.1 XP_021973855.1 | 1.5433 | 1.0443 | 1.47783 |
| XP_022005608.1 XP_022037775.1 | 1.2628 | 0.8544 | 1.478   |
| XP_021969020.1 XP_022010919.1 | 1.5913 | 1.0713 | 1.48539 |
| XP_022013239.1 XP_022026963.1 | 1.3268 | 0.8874 | 1.49515 |
| XP_021978807.1 XP_022022487.2 | 1.6708 | 1.1121 | 1.50238 |
| XP_021993283.1 XP_022005608.1 | 1.4666 | 0.9644 | 1.52074 |
| XP_021973855.1 XP_021988229.1 | 2.1745 | 1.4187 | 1.53274 |
| XP_021988953.1 XP_021993052.1 | 1.2323 | 0.8019 | 1.53673 |
| XP_022010616.1 XP_022029740.1 | 1.013  | 0.6554 | 1.54562 |
| XP_022008276.2 XP_022035552.1 | 1.8488 | 1.1932 | 1.54945 |
| XP_021993221.1 XP_035842399.1 | 2.3631 | 1.5196 | 1.55508 |
| XP_022008276.2 XP_022035551.1 | 1.8217 | 1.1667 | 1.56141 |
| XP_022006668.1 XP_022026963.1 | 1.6363 | 1.0465 | 1.56359 |
| XP_021989735.1 XP_021993283.1 | 1.4866 | 0.9465 | 1.57063 |
| XP_021993621.2 XP_022026964.1 | 0.9838 | 0.6251 | 1.57383 |
| XP_021973316.1 XP_021973855.1 | 2.4596 | 1.5514 | 1.58541 |
| XP_021993622.1 XP_022018622.1 | 1.8356 | 1.142  | 1.60736 |
| XP_022013239.1 XP_022018622.1 | 1.5694 | 0.9763 | 1.6075  |
| XP_021993220.1 XP_022022835.1 | 1.7122 | 1.0615 | 1.613   |
| XP_021993551.1 XP_022006668.1 | 1.7943 | 1.1086 | 1.61853 |
| XP_021976022.1 XP_022021911.1 | 1.9721 | 1.2183 | 1.61873 |
| XP_021993221.1 XP_035838717.1 | 1.7387 | 1.0504 | 1.65527 |
| XP_021973316.1 XP_022029740.1 | 1.4076 | 0.8459 | 1.66403 |
| XP_021976022.1 XP_022021914.1 | 1.9966 | 1.1809 | 1.69074 |
| XP_021993221.1 XP_022009213.1 | 1.659  | 0.973  | 1.70504 |
| XP_021993283.1 XP_022006327.1 | 2.4436 | 1.4272 | 1.71216 |
| XP_021976022.1 XP_022035384.1 | 1.7595 | 1.0205 | 1.72415 |
| XP_021986500.1 XP_021999258.1 | 1.7316 | 1.0037 | 1.72522 |
| XP_022001254.1 XP_022006668.1 | 1.6203 | 0.9368 | 1.72961 |
| XP_021976022.1 XP_022021913.1 | 2.06   | 1.1547 | 1.78401 |
| XP_022006668.1 XP_022035384.1 | 1.6746 | 0.9322 | 1.7964  |
| XP_021993283.1 XP_022001254.1 | 1.7116 | 0.9482 | 1.8051  |
| XP_021993222.1 XP_022005608.1 | 1.4739 | 0.8077 | 1.82481 |
| XP_021969020.1 XP_022005608.1 | 1.732  | 0.9313 | 1.85977 |
| XP_021976022.1 XP_021993222.1 | 2.0304 | 1.0717 | 1.89456 |
| XP_022002415.1 XP_022002417.1 | 0.0314 | 0.0161 | 1.95031 |
| XP_021973855.1 XP_035833070.1 | 1.7125 | 0.8733 | 1.96095 |
| XP_021993622.1 XP_022005608.1 | 1.9556 | 0.9945 | 1.96642 |
| XP_021999258.1 XP_022005608.1 | 1.1965 | 0.5752 | 2.08015 |

Supplementary Table S5: List of differentially expressed lipid transfer proteins in sunflower roots exposed to biotic/abiotic stress

| NCBI protein id | NCBI mRNA id   | log Fold Change | FDR         | Group   | Treatment                 |
|-----------------|----------------|-----------------|-------------|---------|---------------------------|
| XP_021988229.1  | XM_022132537.2 | 2.834715039     | 0.00387003  | Group 1 | abscisic acid (ABA)       |
| XP_022002419.1  | XM_022146727.2 | 8.021563417     | 0.012413052 | Group 1 |                           |
| XP_022002421.1  | XM_022146729.2 | 8.186317769     | 0.006042532 | Group 1 |                           |
| XP_022039085.1  | XM_022183393.2 | 2.511753711     | 0.042272083 | Group 1 |                           |
| XP_022010291.1  | XM_022154599.2 | 6.266556948     | 0.010920857 | Group 1 |                           |
| XP_021978842.1  | XM_022123150.2 | 4.240420962     | 0.002877963 | Group 3 |                           |
| XP_021976022.1  | XM_022120330.2 | 8.466916229     | 0.025079117 | Group 4 |                           |
| XP_021981388.1  | XM_022125696.2 | 4.14310633      | 0.006239578 | Group 4 |                           |
| XP_021981407.1  | XM_022125715.2 | 4.513320439     | 0.003816971 | Group 4 |                           |
| XP_021981626.1  | XM_022125934.2 | 3.712406533     | 0.017443818 | Group 4 |                           |
| XP_021984981.2  | XM_022129289.2 | 2.46919501      | 0.014244771 | Group 4 |                           |
| XP_021989733.1  | XM_022134041.2 | 4.682197855     | 0.001881819 | Group 4 |                           |
| XP_021989734.1  | XM_022134042.2 | 4.240280619     | 0.015103787 | Group 4 |                           |
| XP_021989735.1  | XM_022134043.2 | 4.677704929     | 0.001447002 | Group 4 |                           |
| XP_021989736.1  | XM_022134044.2 | 4.424335739     | 0.000479134 | Group 4 |                           |
| XP_021989737.1  | XM_022134045.2 | 4.870993345     | 0.000345912 | Group 4 |                           |
| XP_021992525.1  | XM_022136833.2 | 5.119870041     | 0.00249623  | Group 4 |                           |
| XP_021999258.1  | XM_022143566.2 | 4.951915155     | 0.001223199 | Group 4 |                           |
| XP_022001254.1  | XM_022145562.2 | 3.631235954     | 0.010139831 | Group 4 |                           |
| XP_022009213.1  | XM_022153521.2 | 5.208208295     | 0.001081865 | Group 4 |                           |
| XP_022013182.1  | XM_022157490.2 | 4.961363904     | 0.041359508 | Group 4 |                           |
| XP_022029622.1  | XM_022173930.2 | 11.29730415     | 0.000326543 | Group 4 |                           |
| XP_022035551.1  | XM_022179859.2 | 2.841906932     | 0.034868881 | Group 4 |                           |
| XP_022029622.1  | XM_022173930.2 | 4.784501987     | 0.034373502 | Group 4 | ethylene (ACC)            |
| XP_021978807.1  | XM_022123115.2 | 1.784522849     | 0.003879871 | Group 1 | auxin (IAA)               |
| XP_021973011.1  | XM_022117319.2 | 2.407373712     | 0.004250813 | Group 3 |                           |
| XP_021973854.1  | XM_022118162.2 | 1.64039657      | 0.032908746 | Group 3 |                           |
| XP_022000196.1  | XM_022144504.2 | 1.962624556     | 0.008497727 | Group 3 |                           |
| XP_022006327.1  | XM_022150635.2 | 1.95107845      | 0.021490264 | Group 3 |                           |
| XP_022037775.1  | XM_022182083.2 | 2.440186916     | 0.027866949 | Group 3 |                           |
| XP_021981388.1  | XM_022125696.2 | -7.869640004    | 0.01857345  | Group 4 |                           |
| XP_021984981.2  | XM_022129289.2 | 1.688692553     | 0.041339442 | Group 4 |                           |
| XP_021989734.1  | XM_022134042.2 | -6.6365625      | 0.04719478  | Group 4 |                           |
| XP_021989736.1  | XM_022134044.2 | -2.283604219    | 0.026583534 | Group 4 |                           |
| XP_021993551.1  | XM_022137859.2 | 2.105354452     | 0.006676769 | Group 4 | methyl jasmonate (MeJA)   |
| XP_021988229.1  | XM_022132537.2 | 2.430023286     | 0.014848974 | Group 1 |                           |
| XP_022039074.2  | XM_022183382.2 | -2.030430003    | 0.018062055 | Group 1 | Saline environment (NaCl) |
| XP_021984981.2  | XM_022129289.2 | 3.06292858      | 0.024043793 | Group 4 |                           |
| XP_021989737.1  | XM_022134045.2 | 2.815975745     | 0.017989441 | Group 4 | salicylic acid (SA)       |
| XP_022009213.1  | XM_022153521.2 | 3.030159904     | 0.040323592 | Group 4 |                           |
| XP_021989735.1  | XM_022134043.2 | 3.811445451     | 0.012418785 | Group 4 |                           |
| XP_021989736.1  | XM_022134044.2 | 3.285999362     | 0.006314513 | Group 4 |                           |
| XP_021989737.1  | XM_022134045.2 | 3.690486494     | 0.003701662 | Group 4 |                           |
| XP_022009213.1  | XM_022153521.2 | 3.305522051     | 0.023768798 | Group 4 | kinetin (KIN)             |
| XP_022029622.1  | XM_022173930.2 | 5.130494744     | 0.042188326 | Group 4 |                           |
